# Supplementary material for: Sediment-encased pressure-temperature maturation experiments chemically simulate natural diagenesis of melanin
Source: Research Square preprint supplement (doi:10.21203/rs.3.rs-106894/v1), 2020-12-11
Supplement: Supplementary file 1 [file 0f7757794cb9b979a67e01f3.docx]

Supplementary Information

**Sediment-encased pressure-temperature maturation experiments chemically simulate natural diagenesis of melanin**

Roy *et al.*

This Supplementary Information includes:

Supplementary Tables S1-S2

Supplementary Figures S1-S5

Supplementary References

**Supplementary Table S1:** Specimen data and experimental maturation treatments. Specimen data includes taxonomic information, and where applicable, museum accession codes, tissue types, fossil localities, and geological ages. PCA No. refers to the data point numbers assigned in the PCA score plots (Figs. 2, S2, S3).

**Capsule matured enzymatically extracted melanin from extant feathers1, 2**

| **PCA No.** | **Common Name** | **Scientific Name** | **T (°C)** | **P (bars)** | **Feather Colour** | **Melanin Type** |
| --- | --- | --- | --- | --- | --- | --- |
| 1 | Chicken | *Gallus gallus* | 200 | 250 | Brown | Phaeomelanin |
| 2 | Carrion crow | *Corvus corone* | 200 | 250 | Glossy Black | Eumelanin |
| 3 | Chicken | *Gallus gallus* | 200 | 250 | Black | Eumelanin |
| 4 | Dark-eyed junco | *Junco hyemalis* | 200 | 250 | Grey | Eumelanin, Phaeomelanin |
| 5 | *Mallard* | *Anas platyrynchos* | 200 | 250 | Grey | Eumelanin, Phaeomelanin |
| 6 | Grey catbird | *Dumetella carolinensis* | 200 | 250 | Brown | Phaeomelanin |
| 7 | Rock dove | *Columba livia* | 200 | 250 | Grey | Eumelanin, Phaeomelanin |
| 8 | Turkey | *Meliagris gallopavo* | 200 | 250 | Iridescent | Eumelanin |
| 9 | Chicken | *Gallus gallus* | 250 | 250 | Brown | Phaeomelanin |
| 10 | Carrion crow | *Corvus corone* | 250 | 250 | Glossy Black | Eumelanin |
| 11 | House wren | *Troglodytes aedon* | 250 | 250 | Brown | Phaeomelanin |
| 12 | Chicken | *Gallus gallus* | 250 | 250 | Black | Eumelanin, Phaeomelanin |
| 13 | Dark-eyed junco | *Junco hyemalis* | 250 | 250 | Grey | Eumelanin, Phaeomelanin |
| 14 | Grey catbird | *Dumetella carolinensis* | 250 | 250 | Brown | Phaeomelanin |
| 15 | Rock dove | *Columba livia* | 250 | 250 | Grey | Eumelanin, Phaeomelanin |
| 16 | Turkey | *Meliagris gallopavo* | 250 | 250 | Iridescent | Eumelanin |

**Melanin-bearing fossil specimens1, 2, 3**

| **PCA No.** | **Taxon** | **Accession No.** | **Clade** | **Tissue** | **Fossil Locality** | **Geological Age** |
| --- | --- | --- | --- | --- | --- | --- |
| 17 | Pipidae | MU 41-3 | Anura | Skin | Mush Valley Ethiopia | Ypresian-Lutetian |
| 18 | Pipidae | MU 32-2A/B | Anura | Skin | Mush Valley Ethiopia | Ypresian-Lutetian |
| 19 | Indeterminate | FUM-N 2275 | Aves | Feather | Fur, Denmark | Ypresian-Lutetian |
| 20 | Indeterminate | SMF-ME 3850 | Aves | Feather | Messel, Germany | Ypresian-Lutetian |
| 21 | *Hassianycteris* | SMF-ME 11407b | Mammalia | Hair | Messel, Germany | Ypresian-Lutetian |
| 22 | *Palaeochiropteryx* | SMF-ME 11406a | Mammalia | Hair | Messel, Germany | Ypresian-Lutetian |
| 23 | *Pelobates* | PW2005-5034-LS-GDKE | Anura | Skin | Enspel, Germany | Chattian |
| 24 | *Keuppia* | NHMUK PI CC578 | Cephalopoda | Ink Sac | Hakel/Hjoula, Lebanon | Cenomanian |
| 25 | *Glyphiteuthis* | BRSUG 29387 | Cephalopoda | Ink Sac | Hakel/Hjoula, Lebanon | Cenomanian |
| 26 | Indeterminate | - | Cephalopoda | Ink Sac | Lyme Regis, UK | Sinemurian |
| 27 | *Messelornis* | SMF-ME 11402a | Aves | Feather | Messel, Germany | Ypresian-Lutetian |
| 28 | *Palaeobatrachus* | SMF-ME 11390a | Anura | Eye | Messel, Germany | Ypresian-Lutetian |
| 29 | *Palaeobatrachus* | SMF-ME 11390a | Anura | Skin | Messel, Germany | Ypresian-Lutetian |
| 30 | Indeterminate | - | Cyclostomata | Eye | Mazon Creek | Carboniferous |
| 31 | *Tullymonstrum* | BMRP2014MCP1000 | Bilateria | Eye | Mazon Creek | Carboniferous |
| 32 | *Tullymonstrum* | BMRP2014MCP1000 | Bilateria | Eye | Mazon Creek | Carboniferous |
| 33 | *Yi qi* | STM 31-2 | Pennaraptora | Feather | Tiaojishan, China | Oxfordian |
| 34 | *Yi qi* | STM 31-2 | Pennaraptora | Feather | Tiaojishan, China | Oxfordian |
| 35 | *Sapeornis* | STM 15-18 | Avialae | Feather | Yixian, China | Aptian-Albian |

**Unmatured enzymatically extracted melanin samples1, 2**

| **PCA No.** | **Common Name** | **Scientific Name** | **Tissue** | **Colour** | **Melanin Type** |
| --- | --- | --- | --- | --- | --- |
| 36 | Chicken | *Gallus gallus* | Feather | Brown | Phaeomelanin |
| 37 | Carrion crow | *Corvus corone* | Feather | Glossy Black | Eumelanin |
| 38 | House wren | *Troglodytes aedon* | Feather | Brown | Phaeomelanin |
| 39 | Chicken | *Gallus gallus* | Feather | Black | Eumelanin |
| 40 | Dark-eyed junco | *Junco hyemalis* | Feather | Grey | Eumelanin, Phaeomelanin |
| 41 | Mallard | *Anas platyrynchos* | Feather | Grey | Eumelanin, Phaeomelanin |
| 42 | Dark-eyed junco | *Dumetella carolinensis* | Feather | Brown | Phaeomelanin |
| 43 | Rock dove | *Columba livia* | Feather | Grey | Eumelanin, Phaeomelanin |
| 44 | Turkey | *Meliagris gallopavo* | Feather | Iridescent | Eumelanin |
| 45 | Rock dove | *Columba livia* | Feather | Grey | Eumelanin, Phaeomelanin |
| 46 | Rock dove | *Columba livia* | Feather | Black | Eumelanin |
| 47 | Edible frog | *Pelophylax kl. esculentus* | Liver | Mixed | Eumelanin, Phaeomelanin |
| 48 | Edible frog | *Pelophylax kl. esculentus* | Eye | Mixed | Eumelanin, Phaeomelanin |
| 49 | Edible frog | *Pelophylax kl. esculentus* | Eye | Mixed | Eumelanin, Phaeomelanin |
| 50 | Eurasian magpie | *Pica pica* | Feather | Iridescent | Eumelanin |
| 51 | Purified Sepiamelanin (Sigma -Aldrich) | | - | - | Eumelanin standard |

**Sediment encased P/T- maturation samples of extant feathers**

| **PCA No.** | **Common Name** | **Scientific Name** | **T (°C)** | **P (bars)** | **Colour** | **Melanin Type** |
| --- | --- | --- | --- | --- | --- | --- |
| 52 | Wrinkled hornbill | *Rhabdotorrhinus corrugatus* | ~190 | 250 | Black | Eumelanin |
| 53 | Common pheasant | *Phasianus colchicus* | ~190 | 250 | Brown | Phaeomelanin |
| 54 | Rock dove | *Columba livia* | ~190 | 250 | Grey | Eumelanin, Phaeomelanin |
| 55 | Wrinkled hornbill | *Rhabdotorrhinus corrugatus* | ~190 | 250 | Black | Eumelanin |
| 56 | Rock dove | *Columba livia* | ~190 | 250 | Iridescent | Eumelanin |
| 57 | White-rumped munia | *Lonchura striata* | ~200 | 250 | Black | Eumelanin |
| 58 | Von Shrenck’s bittern | *Ixobrychus eurhythmus* | ~200 | 250 | Brown | Phaeomelanin |
| 59 | Von Shrenck’s bittern | *Ixobrychus eurhythmus* | ~200 | 250 | Grey | Eumelanin, Phaeomelanin |
| 60 | Rock dove | *Columba livia* | ~200 | 250 | Iridescent | Eumelanin |
| 61 | Common pheasant | *Phasianus colchicus* | ~225 | 250 | Brown | Phaeomelanin |
| 62 | Turkey | *Meliagris gallopavo* | ~225 | 250 | Iridescent | Eumelanin |
| 63 | Wrinkled hornbill | *Rhabdotorrhinus corrugatus* | ~225 | 250 | Black | Eumelanin |
| 64 | Rock dove | *Columba livia* | ~225 | 250 | Grey | Eumelanin, Phaeomelanin |
| 65 | Common pheasant | *Phasianus colchicus* | ~250 | 250 | Brown | Phaeomelanin |
| 66 | Wrinkled hornbill | *Rhabdotorrhinus corrugatus* | ~250 | 250 | Black | Eumelanin |
| 67 | Rock dove | *Columba livia* | ~250 | 250 | Grey | Eumelanin, Phaeomelanin |
| 68 | Turkey | *Meliagris gallopavo* | ~250 | 250 | Iridescent | Eumelanin |
| 69 | Turkey | *Meliagris gallopavo* | ~250 | 250 | Iridescent | Eumelanin |
| 70 | Common pheasant | *Phasianus colchicus* | ~250 | 250 | Brown | Phaeomelanin |
| 71 | Wrinkled hornbill | *Rhabdotorrhinus corrugatus* | ~250 | 250 | Black | Eumelanin |
| 72 | Rock dove | *Columba livia* | ~250 | 250 | Grey | Eumelanin, Phaeomelanin |
| 73 | Wrinkled hornbill | *Rhabdotorrhinus corrugatus* | ~300 | 250 | Black | Eumelanin |
| 74 | Common pheasant | *Phasianus colchicus* | ~300 | 250 | Brown | Phaeomelanin |
| 75 | White-rumped munia | *Lonchura striata* | ~300 | 250 | Black | Eumelanin |
| 76 | Von Shrenck’s bittern | *Ixobrychus eurhythmus* | ~300 | 250 | Brown | Phaeomelanin |
| 77 | Von Shrenck’s bittern | *Ixobrychus eurhythmus* | ~300 | 250 | Grey | Eumelanin, Phaeomelanin |
| 78 | Rock dove | *Columba livia* | ~300 | 250 | Iridescent | Eumelanin |
| 79 | Wrinkled hornbill | *Rhabdotorrhinus corrugatus* | ~300 | 250 | Black | Eumelanin |

**Supplementary Figure S1:** PCA on ToF-SIMS data of fossil and experimental samples. **a** Comparison of secondary ion spectra of fresh melanin extracts, capsule-matured melanin extracts, sediment-encased maturation (SEM) of whole feathers, and fossil samples.

**
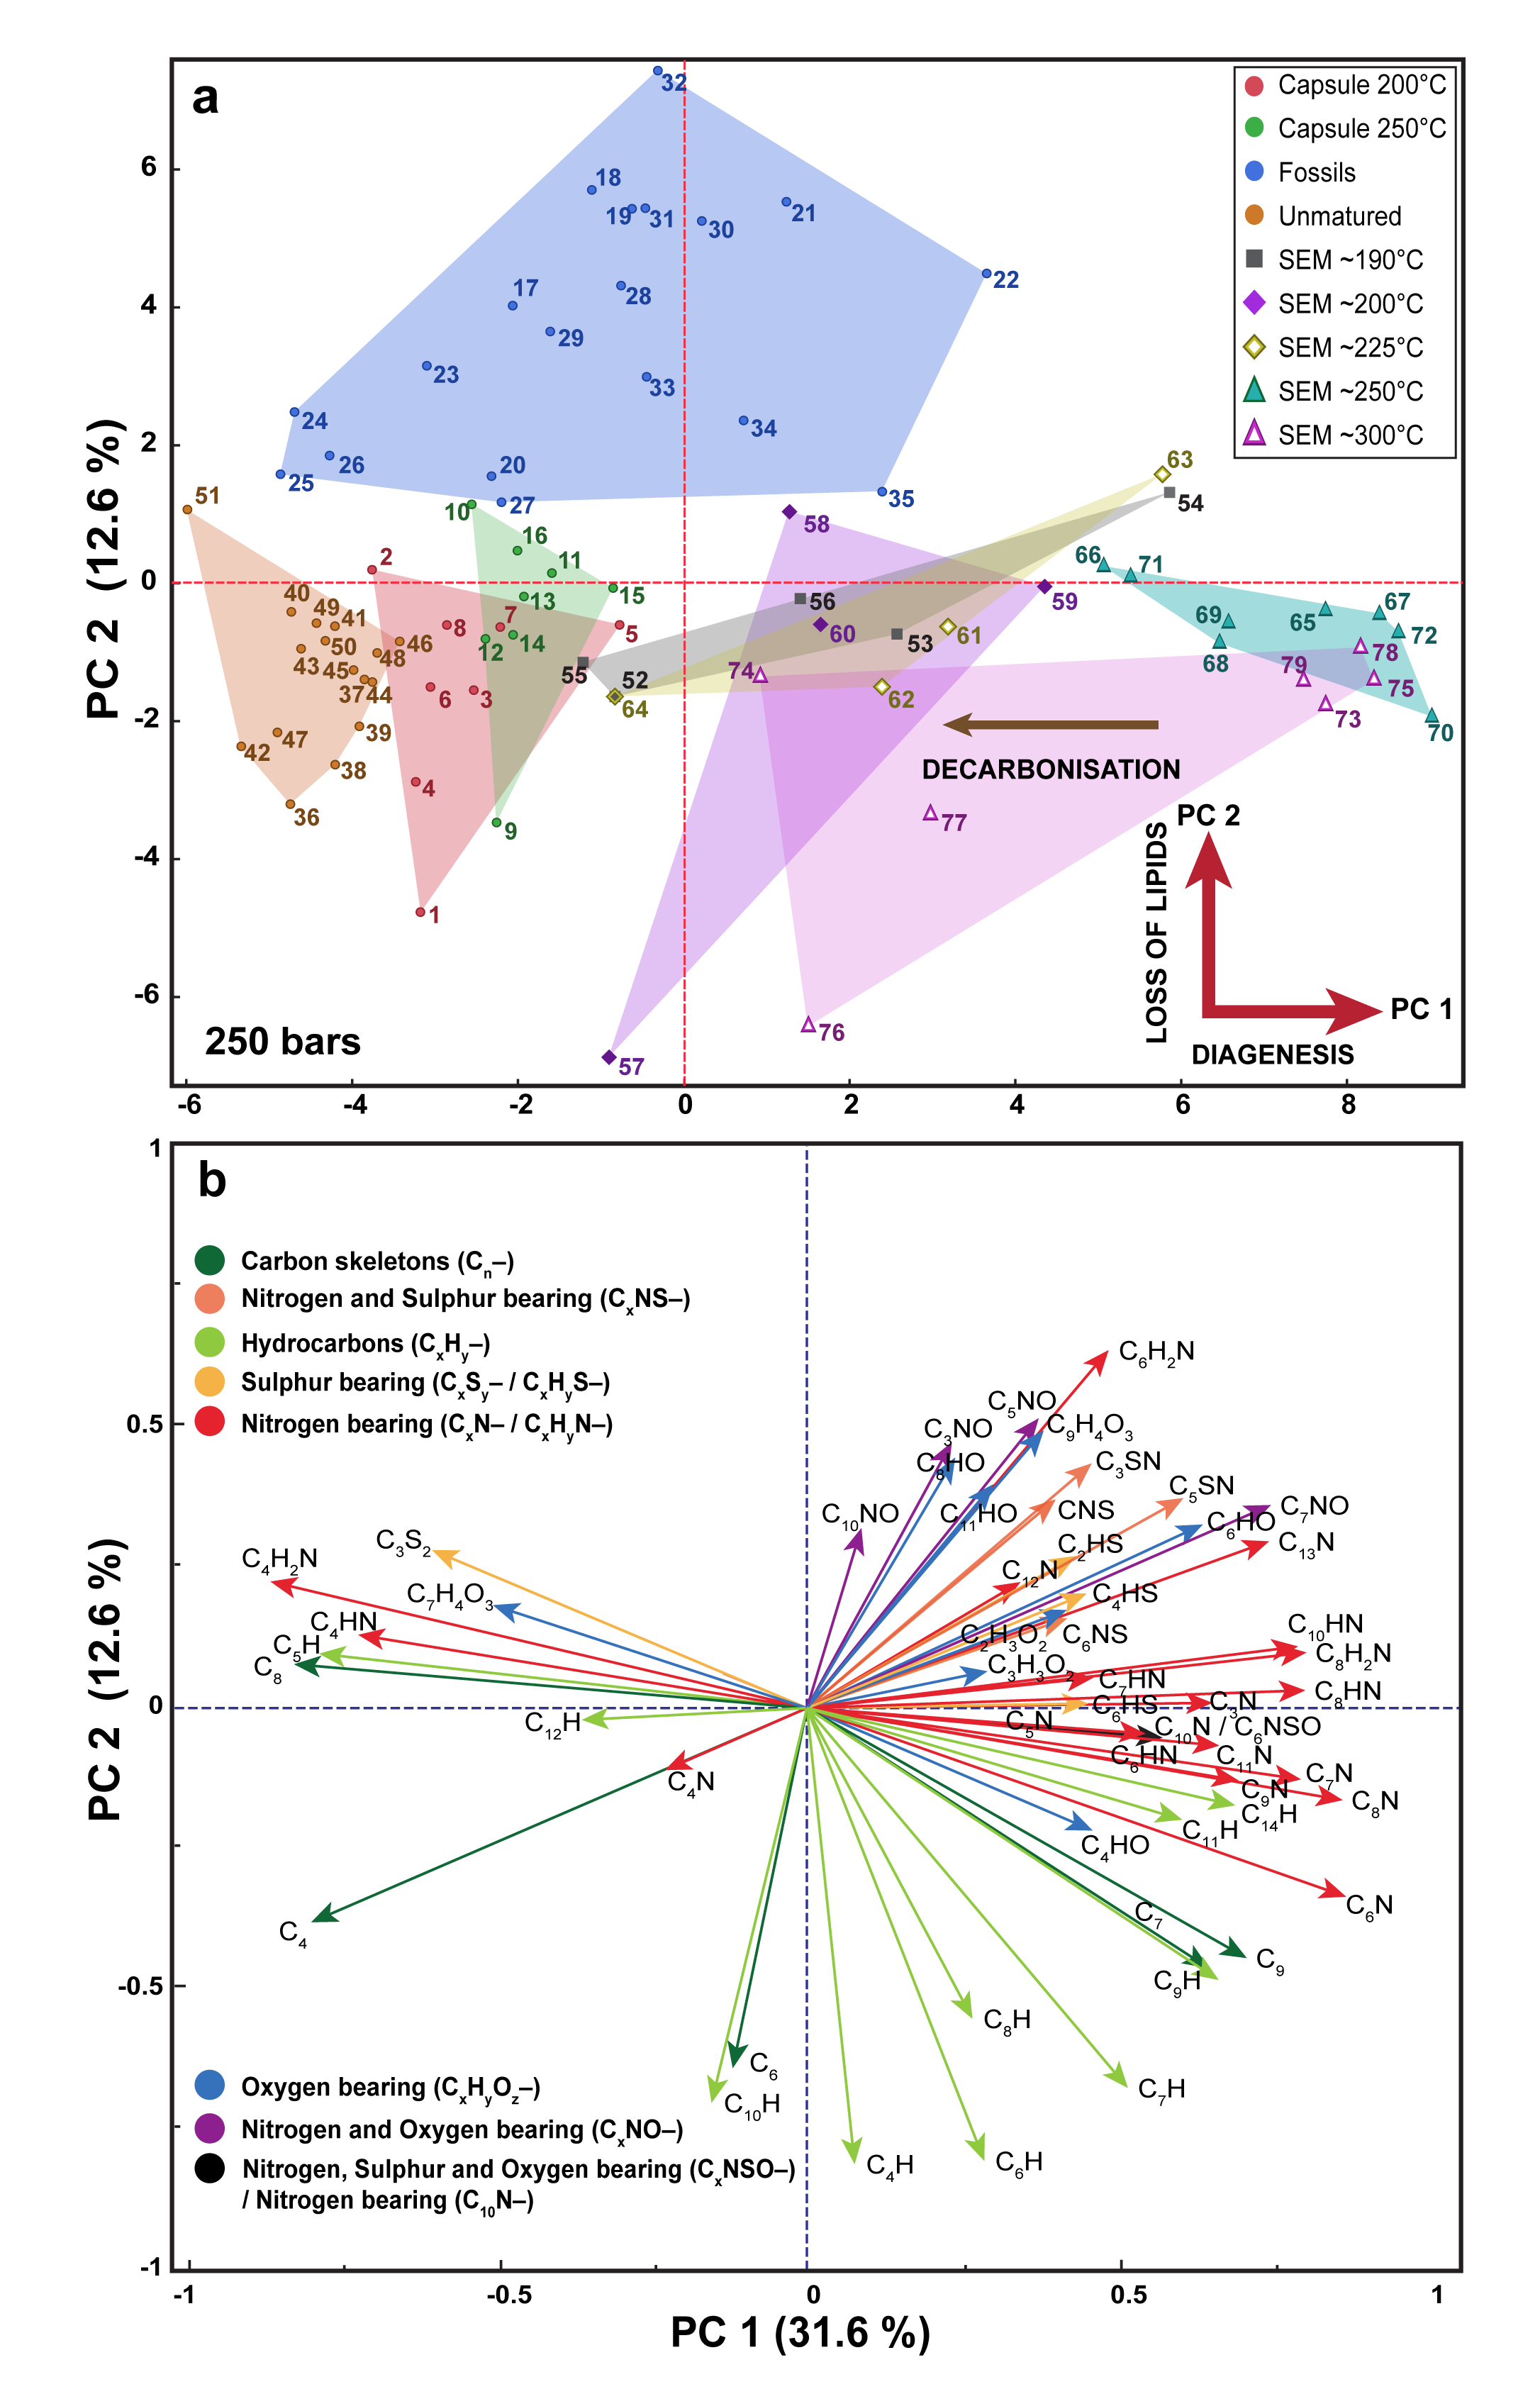
**

**Supplementary Figure S2: Comparison of ToF-SIMS spectra of fresh, experimental and fossil samples.** Aligned time-of-flight secondary ion negative spectra for α-keratin reference (K0253, Sigma-Aldrich)4, white feather β-keratin4, fresh (unmatured) melanin extracted from black and brown feathers1, (spectra collected at room temperature under the same analytical parameters on the same make and model of equipment as used here and provided by Peter Sjövall, RISE Research Institutes of Sweden, Chemistry and Materials, Borås, Sweden), 200°C capsule-matured melanin extracted from black and brown feathers, 200°C sediment-encased P/T-matured black and brown feathers, and a fossil feather (*Messelornis*, SMF-ME 11402a). Spectra are colour coded as: feather β-keratin reference (red), unmatured melanin extract (purple), capsule-matured melanin extract (pink), sediment-matured feathers (green), and fossil feather (blue). Characteristic melanin fragments based on Colleary, Dolocan 1 and Lindgren, Sjovall 5,6 are shown as dots above each spectrum. Black dots indicate eumelanin-specific fragments, whereas brown dots indicate phaeomelanin-specific fragments. A large peak present at m/Z 75 and two large peaks m/Z 90.84 and 92.93, as well as the absence of peaks beyond m/Z 120, in the α -keratin spectrum indicate that experimental and fossil samples do not match α -keratin, but instead are dominated by melanin. β-keratin spectrum also largely shows peaks which do not match the unmatured melanin, experimental samples or fossil melanin. We expect melanin to be a more heavily cross-linked polymer in many of these samples than a polypeptide chain, possibly explaining the lack of large mass fragments in the feather β-keratin reference. ~190-200°C experimentally matured samples are shown here because these appear to be most similar to fossil specimens in PCA.

**
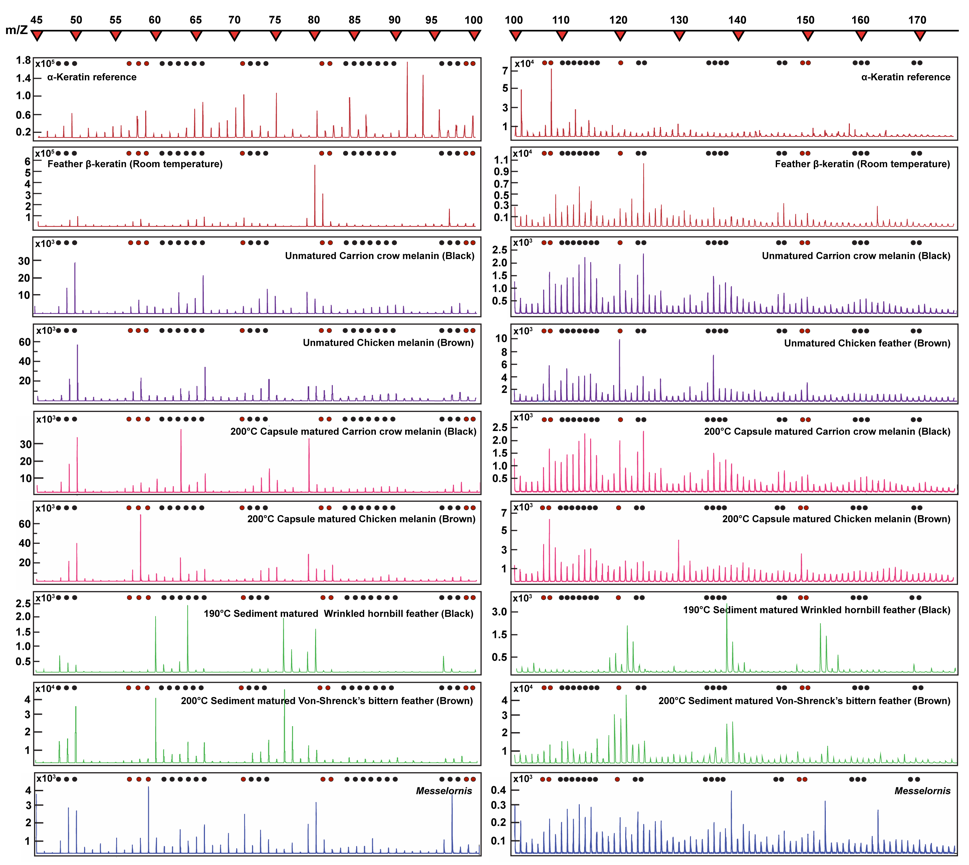
**

**Supplementary Table S2:** PCA loading matrixshowing the loadings for the 55 characteristic TOF-SIMS peaks of melanin in PC1–PC4 of the total PCA (i.e., with hydrocarbons included). Secondary ions are colour-coded to reflect different heteroatomic compositions: (a) carbon skeletons (Cn-, dark green); (b) hydrocarbons (CxHy-, light green); sulphur-bearing (CxSy-/ CxHyS-, yellow); nitrogen-bearing (CxN-/CxHyH-, red); nitrogen- and sulphur-bearing (CxNS, orange); oxygen-bearing (CxHyOz-, dark blue); and nitrogen-, sulphur-, and oxygen-bearing (CxNSO-, black). The black colour indicates CxNSO- (m/Z 134.00) but the fragment size is also very similar to that of C10N (m/Z 133.97) thus two chemical groups cannot be unambiguously identified. Peak assignments based on Colleary, Dolocan 1 and Lindgren, Sjovall 5,6.

| **Fragments** | **PC1** | **PC2** | **PC3** | **PC4** |
| --- | --- | --- | --- | --- |
| **C4** | -0.79348 | -0.38106 | -0.20128 | -0.04774 |
| **C4H** | 0.07623 | -0.81131 | 0.00647 | -0.30771 |
| **C3N** | 0.64900 | 0.00922 | -0.46777 | -0.43664 |
| **C2HS** | 0.34168 | 0.22413 | 0.58716 | -0.51734 |
| **CNS** | 0.39801 | 0.37143 | 0.41605 | -0.60341 |
| **C2H3O2** | -0.13391 | 0.06111 | 0.62390 | 0.49750 |
| **C5H** | -0.78069 | 0.09671 | 0.14468 | 0.21807 |
| **C4N** | -0.22715 | -0.11034 | 0.29148 | 0.26806 |
| **C4HN** | -0.71828 | 0.13035 | 0.10357 | 0.09341 |
| **C4H2N** | -0.85863 | 0.22507 | -0.09924 | 0.03929 |
| **C4HO** | 0.45725 | -0.21788 | -0.24053 | -0.23427 |
| **C3NO** | 0.23182 | 0.47289 | -0.49582 | 0.32742 |
| **C3H3O2** | 0.28875 | 0.06541 | 0.65880 | 0.41566 |
| **C6** | -0.11883 | -0.64061 | -0.17591 | -0.18182 |
| **C6H** | 0.28386 | -0.80549 | 0.11529 | -0.20459 |
| **C5N** | 0.56919 | -0.05277 | -0.45536 | -0.43887 |
| **C4HS** | 0.43053 | 0.27049 | 0.48577 | -0.49807 |
| **C3SN** | 0.45559 | 0.43530 | 0.37392 | -0.56889 |
| **C7** | 0.64412 | -0.46335 | 0.06603 | 0.26114 |
| **C7H** | 0.51360 | -0.67589 | 0.11901 | 0.10843 |
| **C6N** | 0.86293 | -0.33562 | -0.04337 | 0.12535 |
| **C6HN** | 0.58140 | -0.05810 | 0.47945 | 0.21089 |
| **C6H2N** | 0.48274 | 0.63677 | -0.34204 | -0.16755 |
| **C6HO** | 0.63358 | 0.32656 | -0.29311 | -0.12294 |
| **C5NO** | 0.37084 | 0.51547 | -0.61127 | 0.24936 |
| **C8** | -0.82092 | 0.07798 | -0.09203 | 0.08879 |
| **C8H** | 0.26480 | -0.55265 | 0.11948 | 0.05047 |
| **C7N** | 0.79056 | -0.12682 | -0.23553 | -0.24015 |
| **C7HN** | 0.45831 | 0.05401 | 0.59952 | 0.38361 |
| **C3S2** | -0.59989 | 0.28103 | 0.22565 | 0.36069 |
| **C6HS** | 0.44992 | 0.00809 | 0.34848 | -0.31165 |
| **C5SN** | 0.60254 | 0.37367 | 0.23380 | -0.32843 |
| **C9** | 0.70385 | -0.44484 | -0.02740 | 0.05288 |
| **C9H** | 0.65874 | -0.48373 | -0.01573 | 0.26620 |
| **C8N** | 0.85731 | -0.16372 | 0.11039 | 0.18207 |
| **C8HN** | 0.79748 | 0.03150 | 0.28103 | 0.13854 |
| **C8H2N** | 0.79941 | 0.09892 | 0.13855 | -0.04169 |
| **C8HO** | 0.23723 | 0.44589 | -0.33622 | 0.29418 |
| **C7NO** | 0.74257 | 0.36120 | -0.13423 | 0.25427 |
| **C6NS** | 0.41639 | 0.15956 | -0.20360 | 0.44393 |
| **C10H** | -0.15281 | -0.70235 | 0.06481 | 0.21619 |
| **C9N** | 0.69098 | -0.12910 | -0.24374 | -0.08706 |
| **C11H** | 0.60051 | -0.19860 | 0.16582 | 0.47884 |
| **C10N/C6NSO** | 0.54207 | -0.04551 | -0.24712 | 0.47626 |
| **C10HN** | 0.78599 | 0.10959 | 0.04062 | 0.14465 |
| **C7H4O3** | -0.50253 | 0.18313 | -0.02421 | 0.02818 |
| **C12H** | -0.36019 | -0.02106 | 0.13366 | 0.17110 |
| **C11N** | 0.65979 | -0.06678 | -0.28121 | 0.20240 |
| **C11HO** | 0.29809 | 0.39806 | 0.45738 | -0.07440 |
| **C10NO** | 0.08715 | 0.32015 | 0.39224 | 0.49388 |
| **C12N** | 0.41587 | 0.17439 | -0.51029 | 0.38937 |
| **C12HN** | 0.44753 | 0.20384 | -0.08908 | 0.18780 |
| **C9H4O3** | 0.37889 | 0.49403 | 0.26780 | 0.04476 |
| **C14H** | 0.68536 | -0.17308 | 0.14279 | 0.12509 |
| **C13N** | 0.73954 | 0.29675 | -0.11744 | 0.15208 |

**Supplementary Figure S3** Loadings of ToF-SIMS secondary ions on PC1–PC4 of the same PCA as shown in Fig. 2 (i.e., all 55 fragments included). Different chemical groups are colour coded. The black bar indicates CxNSO- (m/Z 134.00) but the fragment size is also very similar to that of C10N (m/Z 133.97) thus two chemical groups cannot be unambiguously identified.


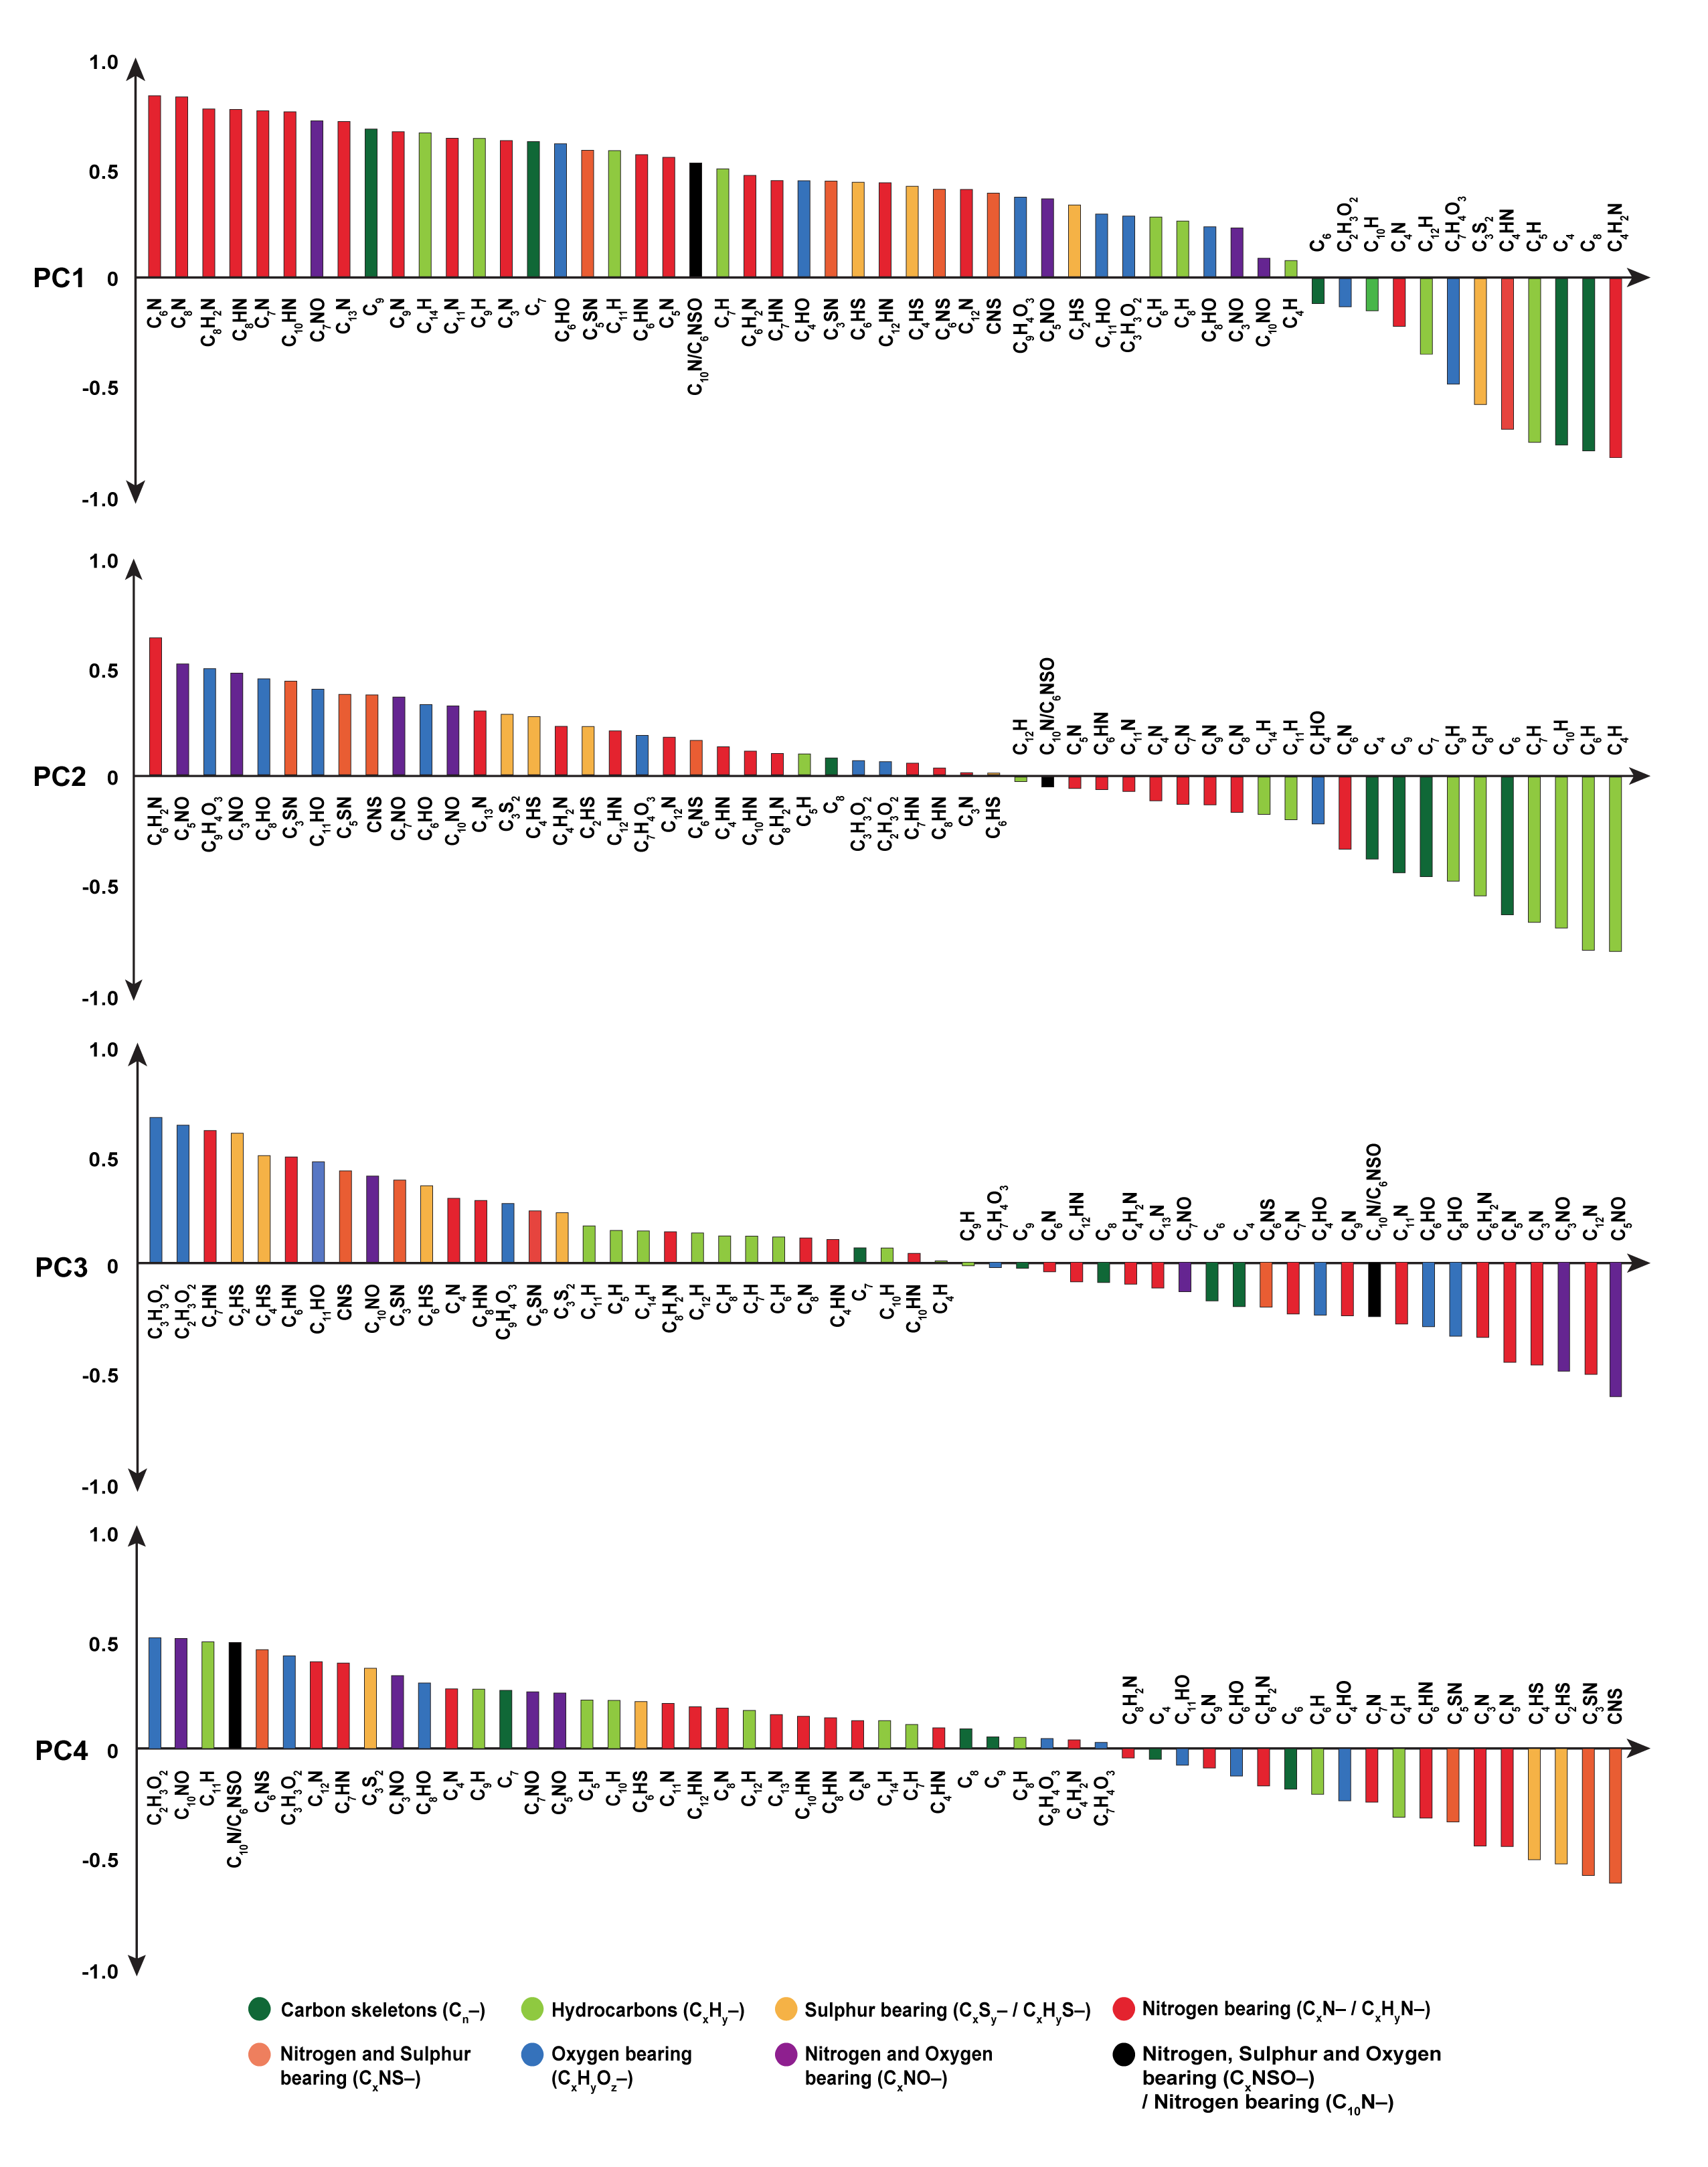


**Supplementary Figure S4:** PC2 and PC3 of the same PCA on TOF-SIMS data of fossil and modern/experimental samples as in Fig. 2 (i.e., all 55 fragments included). **a** Comparison of secondary ion spectra of modern melanin extracts, capsule-matured melanin extracts, sediment-encased maturation (SEM) of whole feathers, and fossil samples along PC2 and PC3. **b** Loading plot indicating the relative contributions of secondary ions on PC2 and PC3**.** The black arrow indicates CxNSO- (m/Z 134.00) but the fragment size is also very similar to that of C10N (m/Z 133.97) thus two cannot be unambiguously identified. **c** Box plot of PC3 values according to sample category.

**
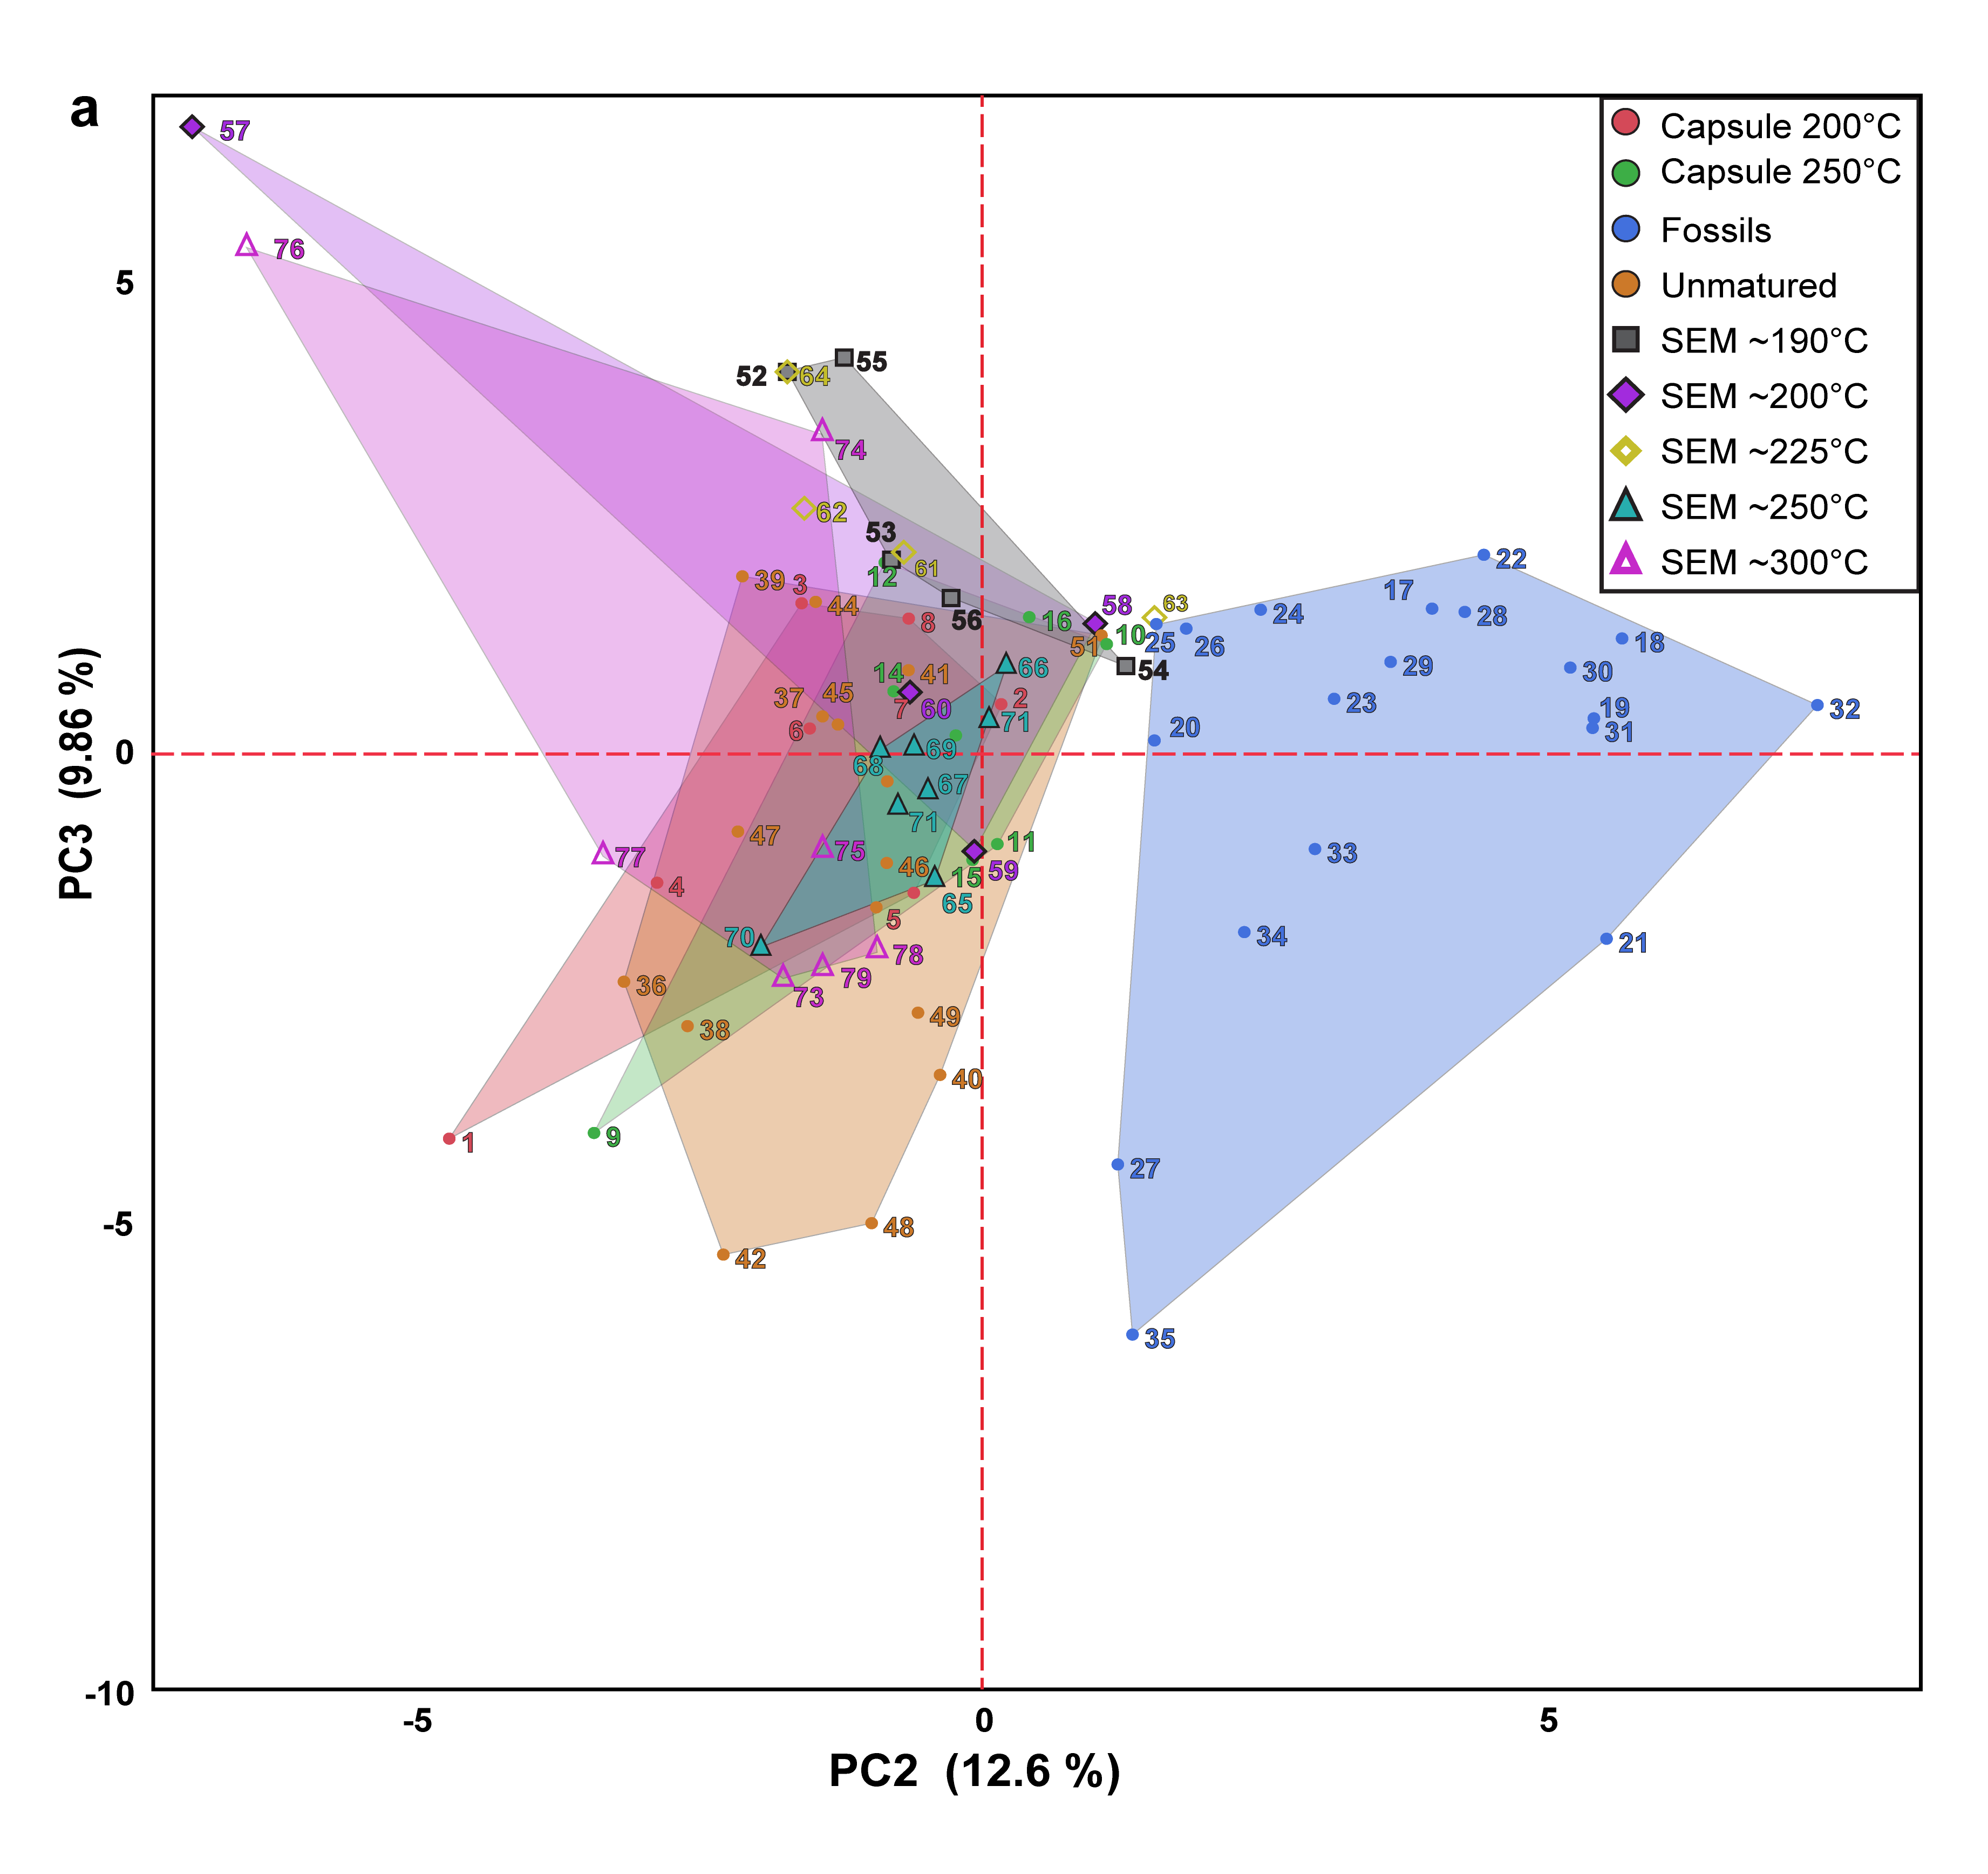
**

**
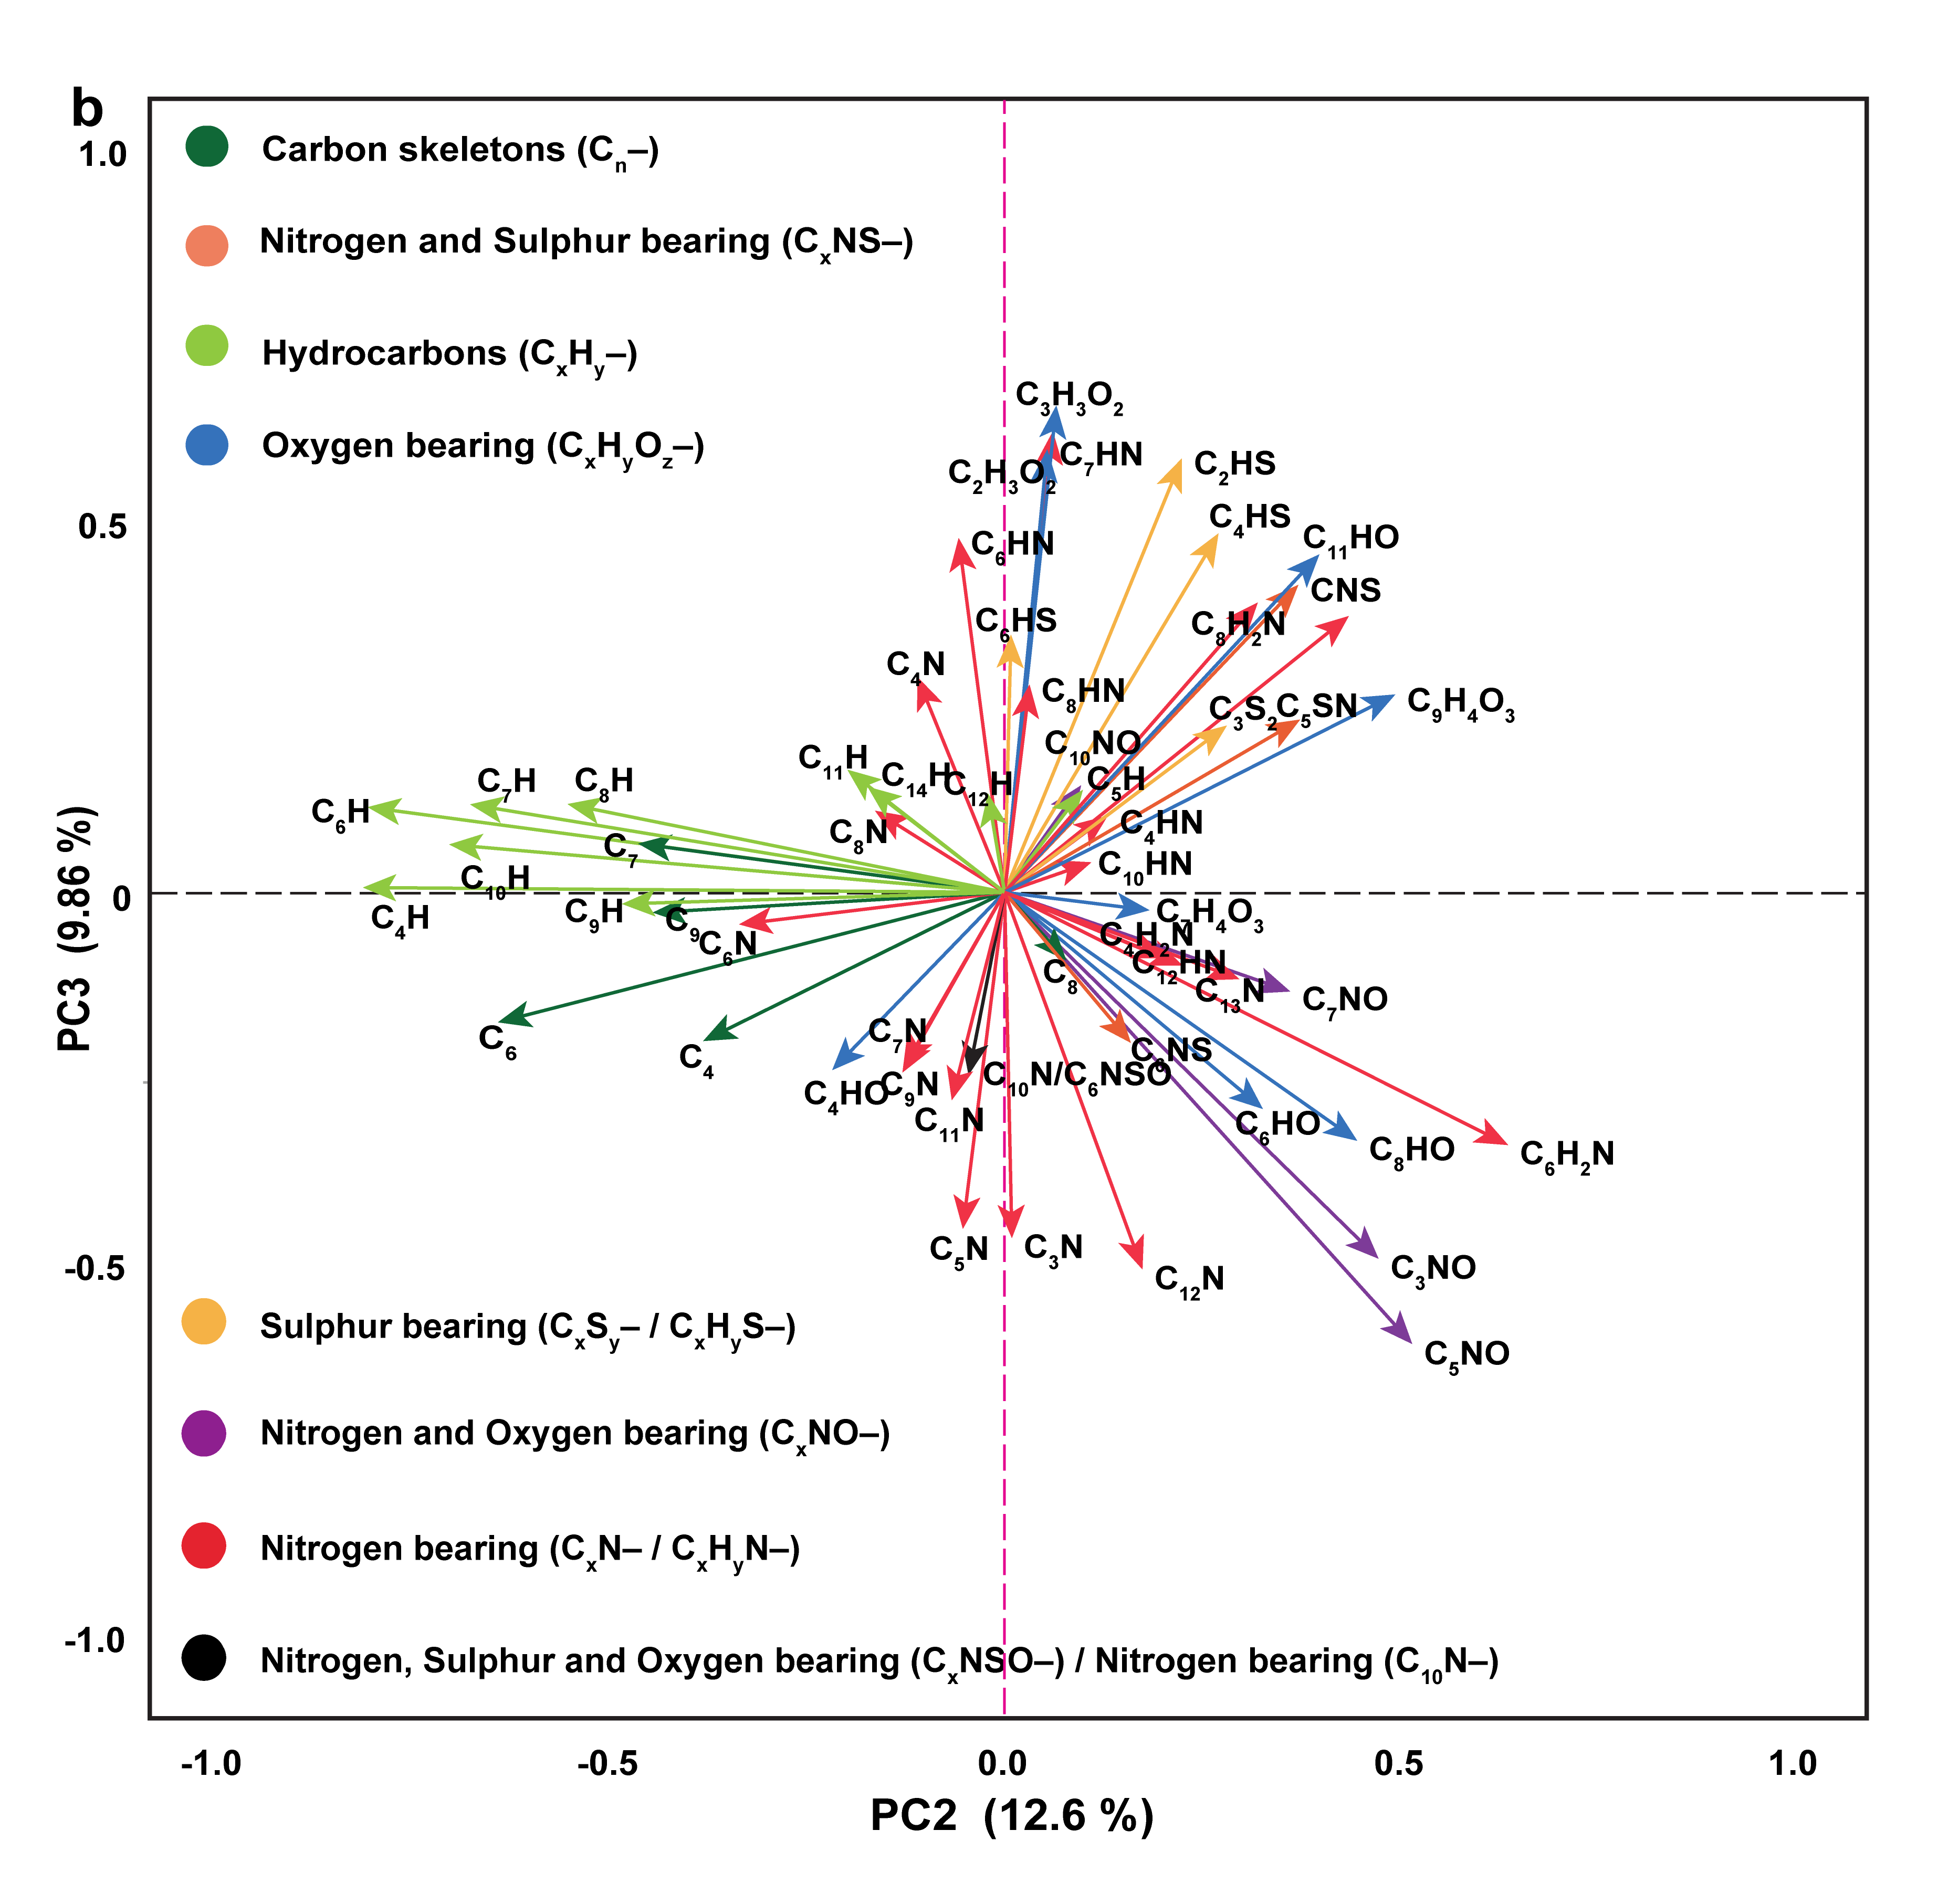
**

**
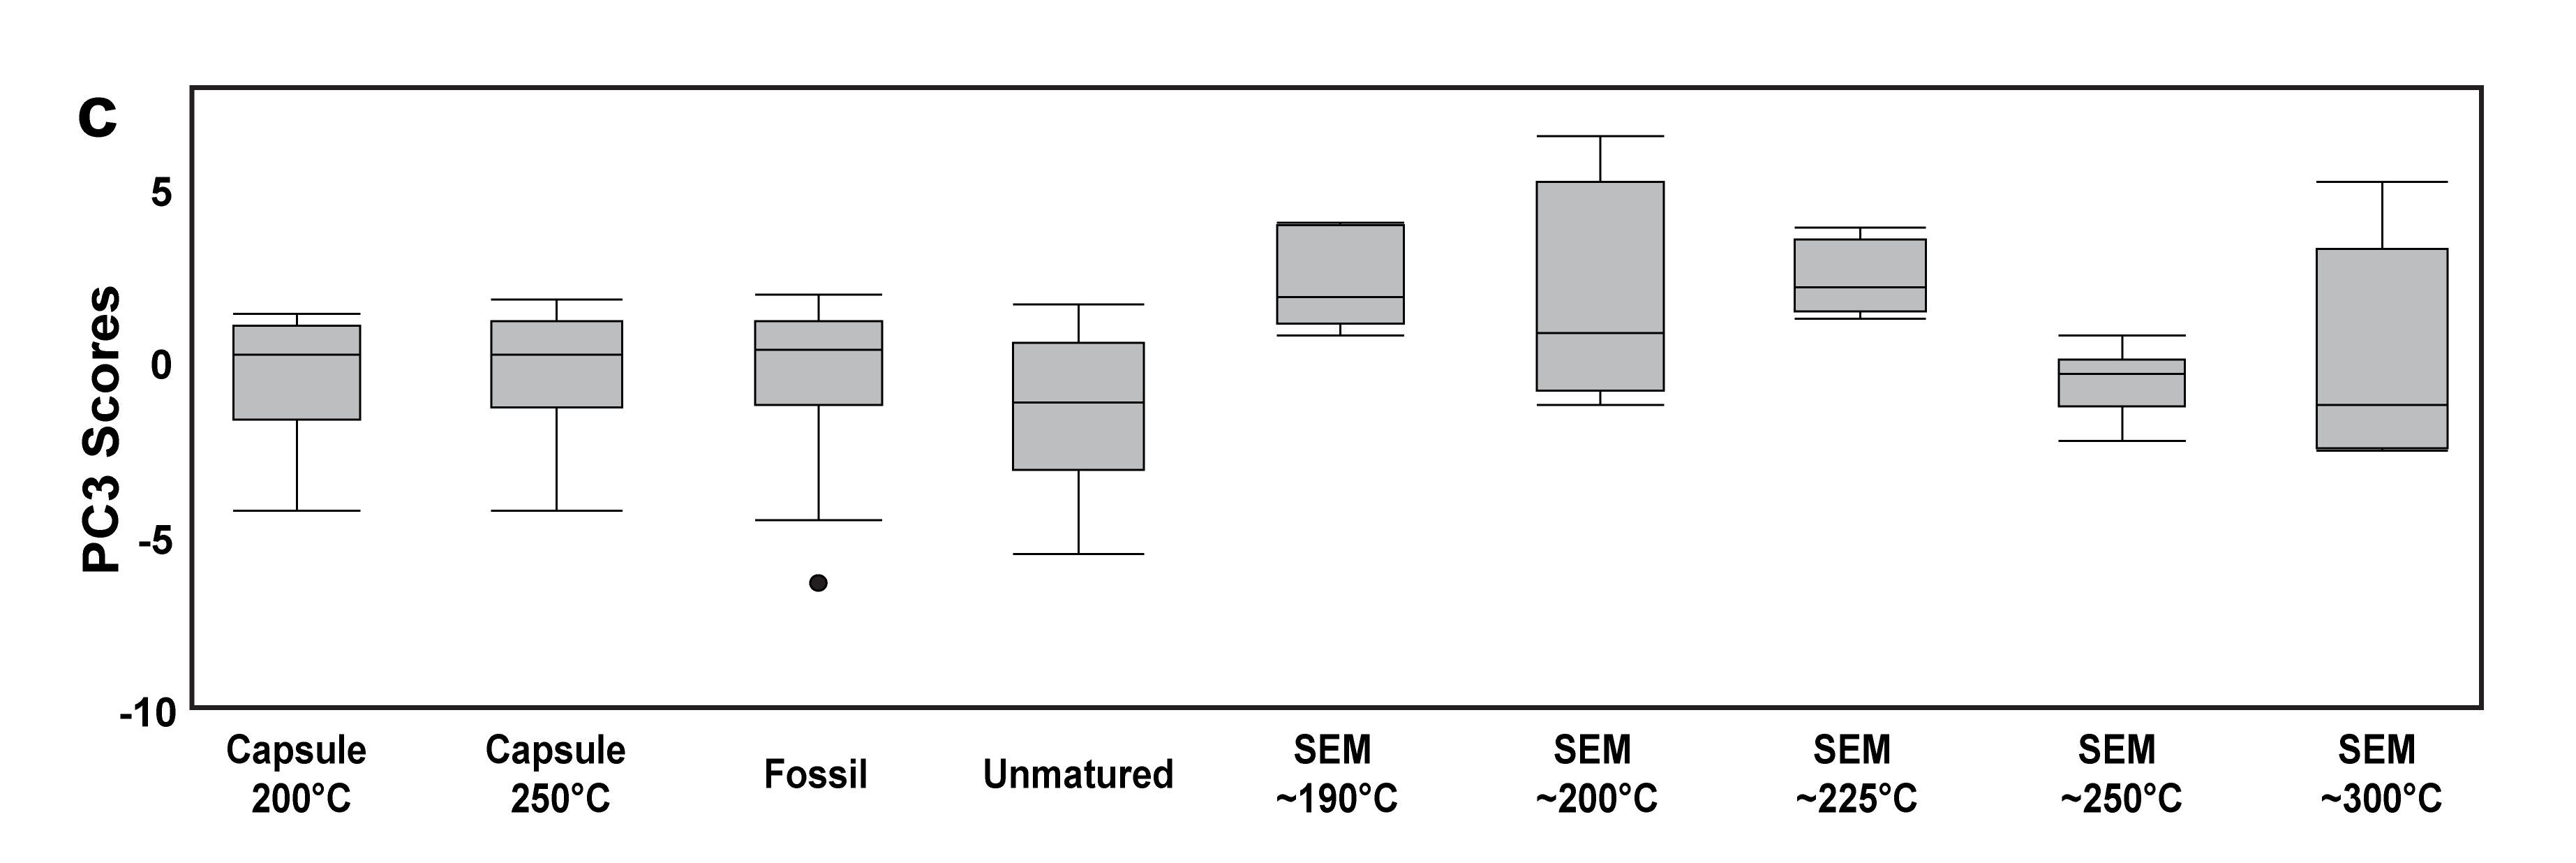
**

**Supplementary Figure S5:** A separate PCA on negative secondary ions in which hydrocarbon (CxHy-) fragments are excluded (i.e., the remaining 45 fragments) **a** Excluding hydrocarbon fragments leads to an increase in overlap between experimental categories (Capsule 200-250°C; 195-225°C) and fossils suggesting that fossils are depleted in hydrocarbon fragments due to early microbial decay or late oxidative weathering. PC1 scores of low temperature sediment matured samples (~190°C, ~200°C, ~225°C) become more comparable with fossil samples when this hydrocarbon discrepancy is accounted for. There is some heterogeneity in fossil samples probably due to differences in age, locality, and taphonomy. Fossils overlap with a few unmatured melanin extracts further supporting the idea that melanin, rather than protein, produces the stains of fossils. **b** Loading plot indicating the relative contributions of secondary ions on PC1 and PC2. The black arrow indicates CxNSO- (m/Z 134.00) but the fragment size is also very similar to that of C10N (m/Z 133.97) thus two chemical groups cannot be unambiguously identified.


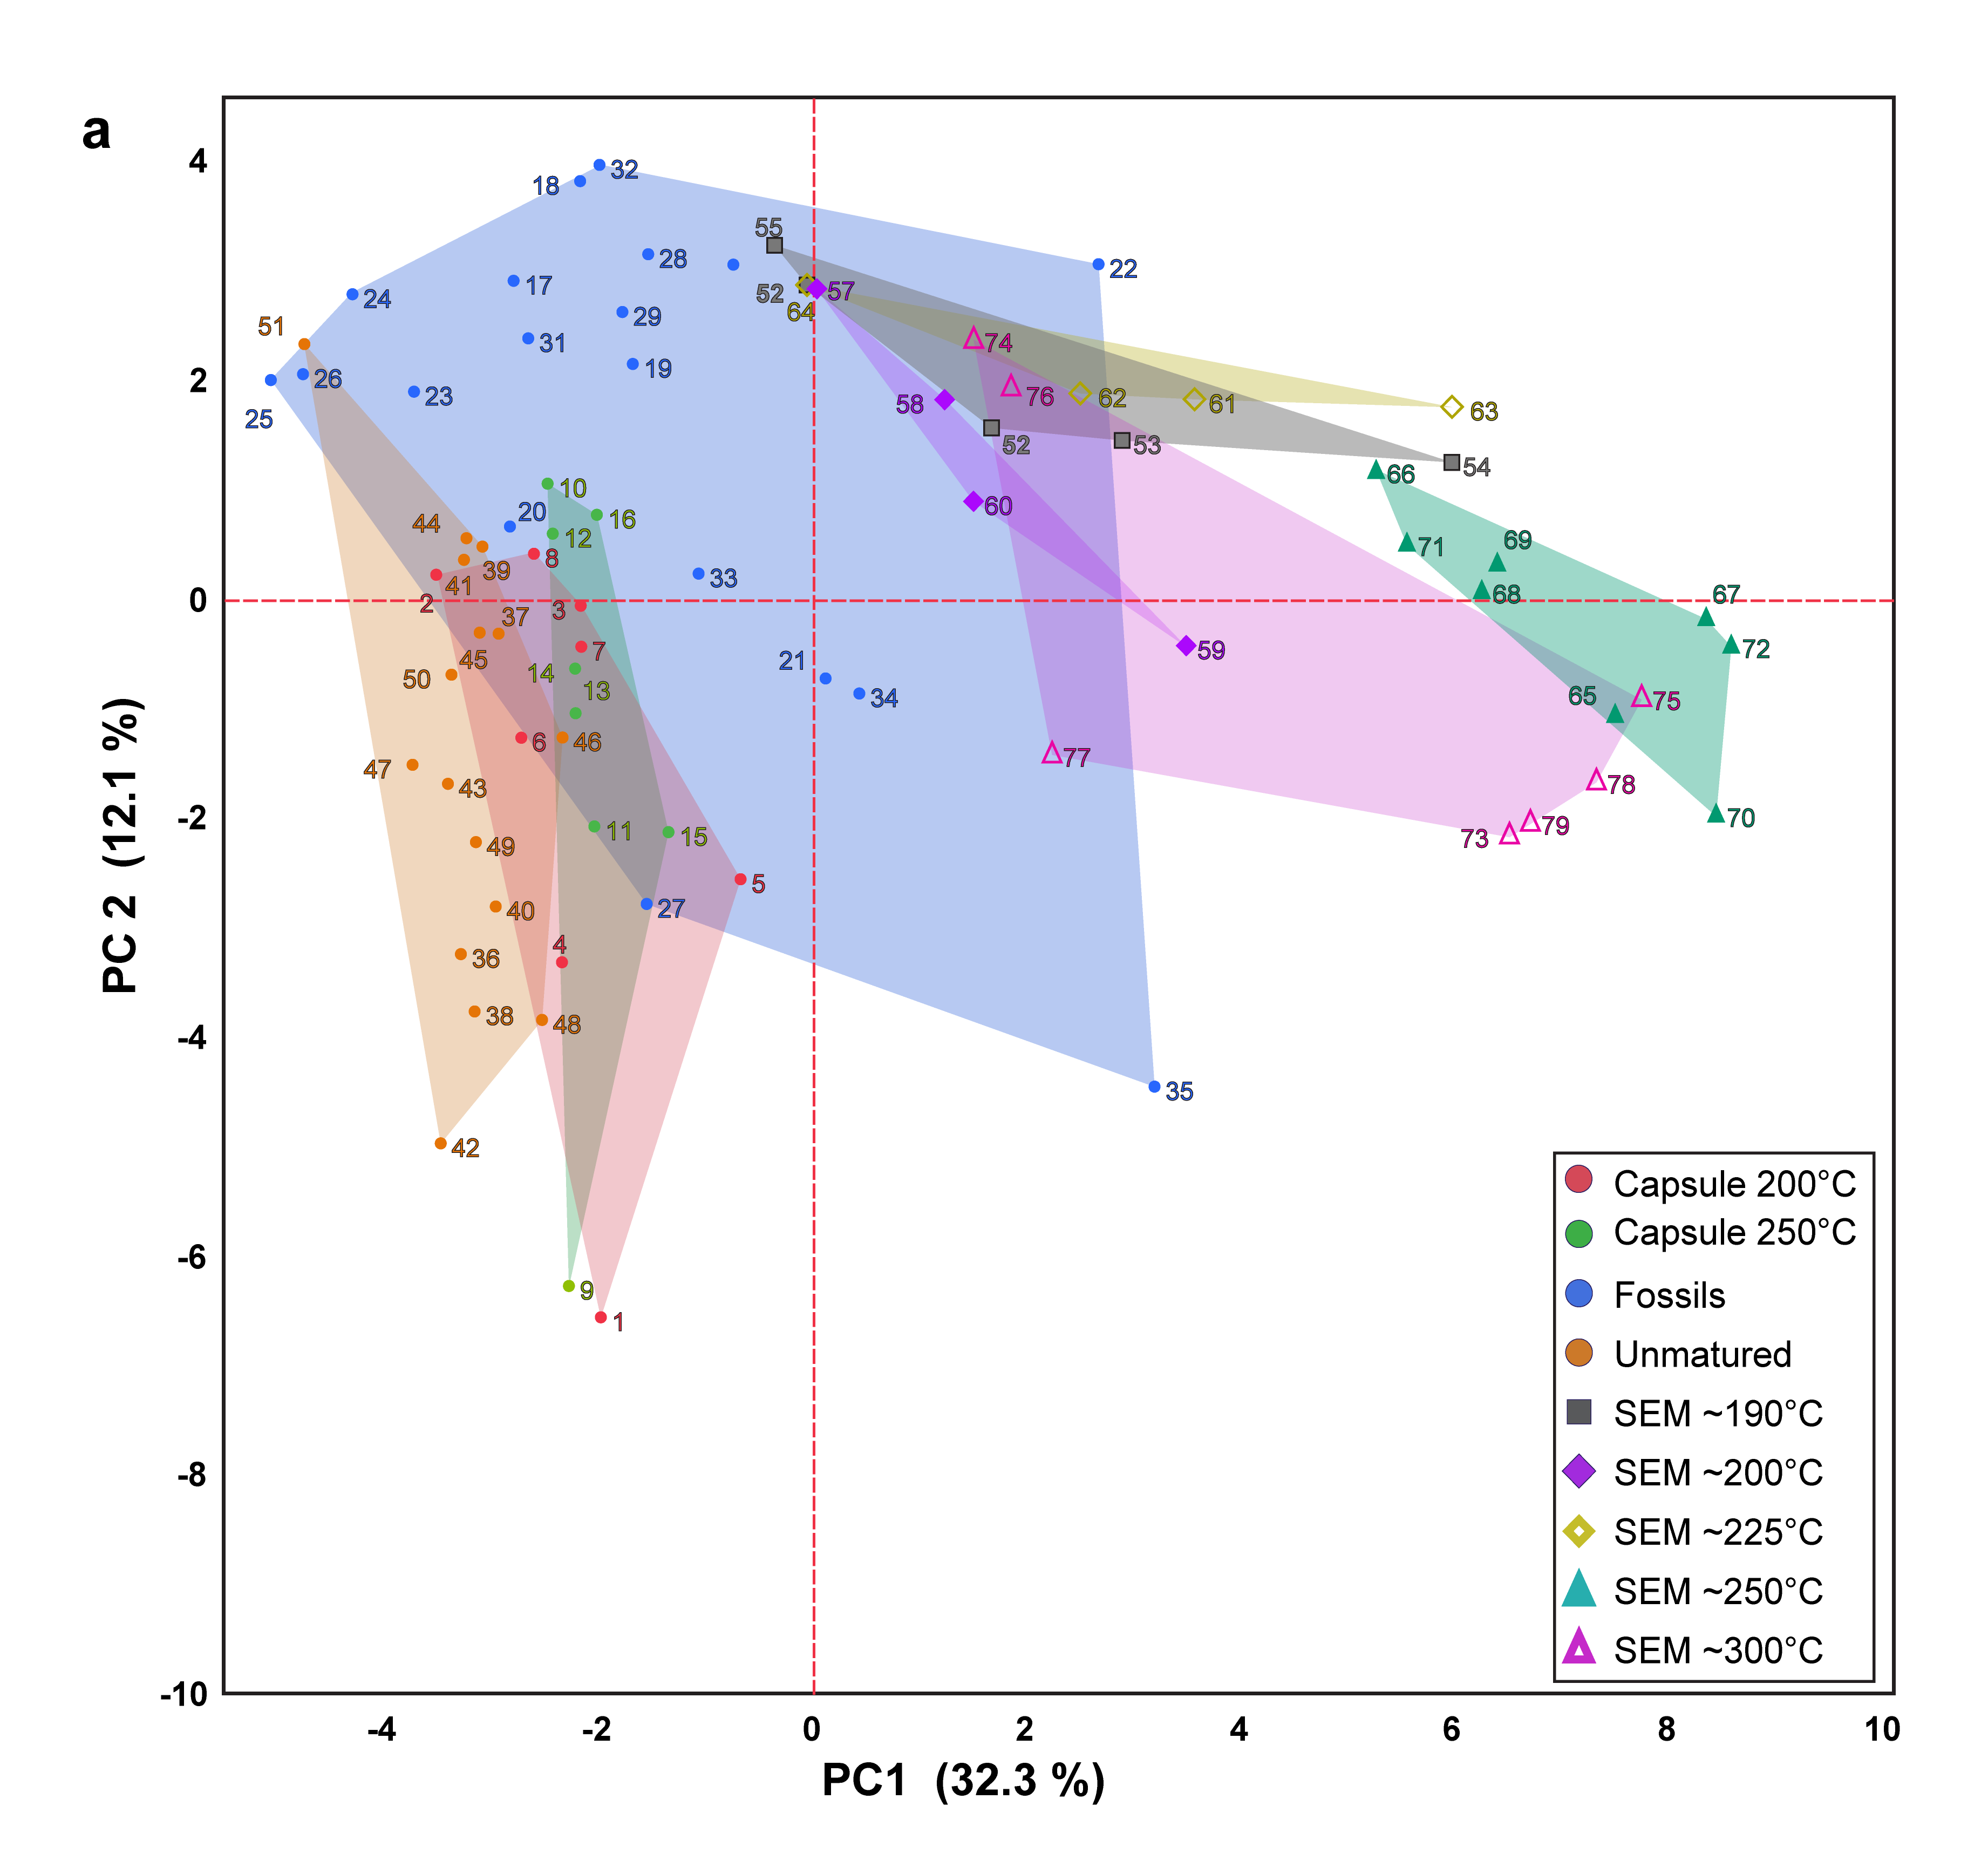


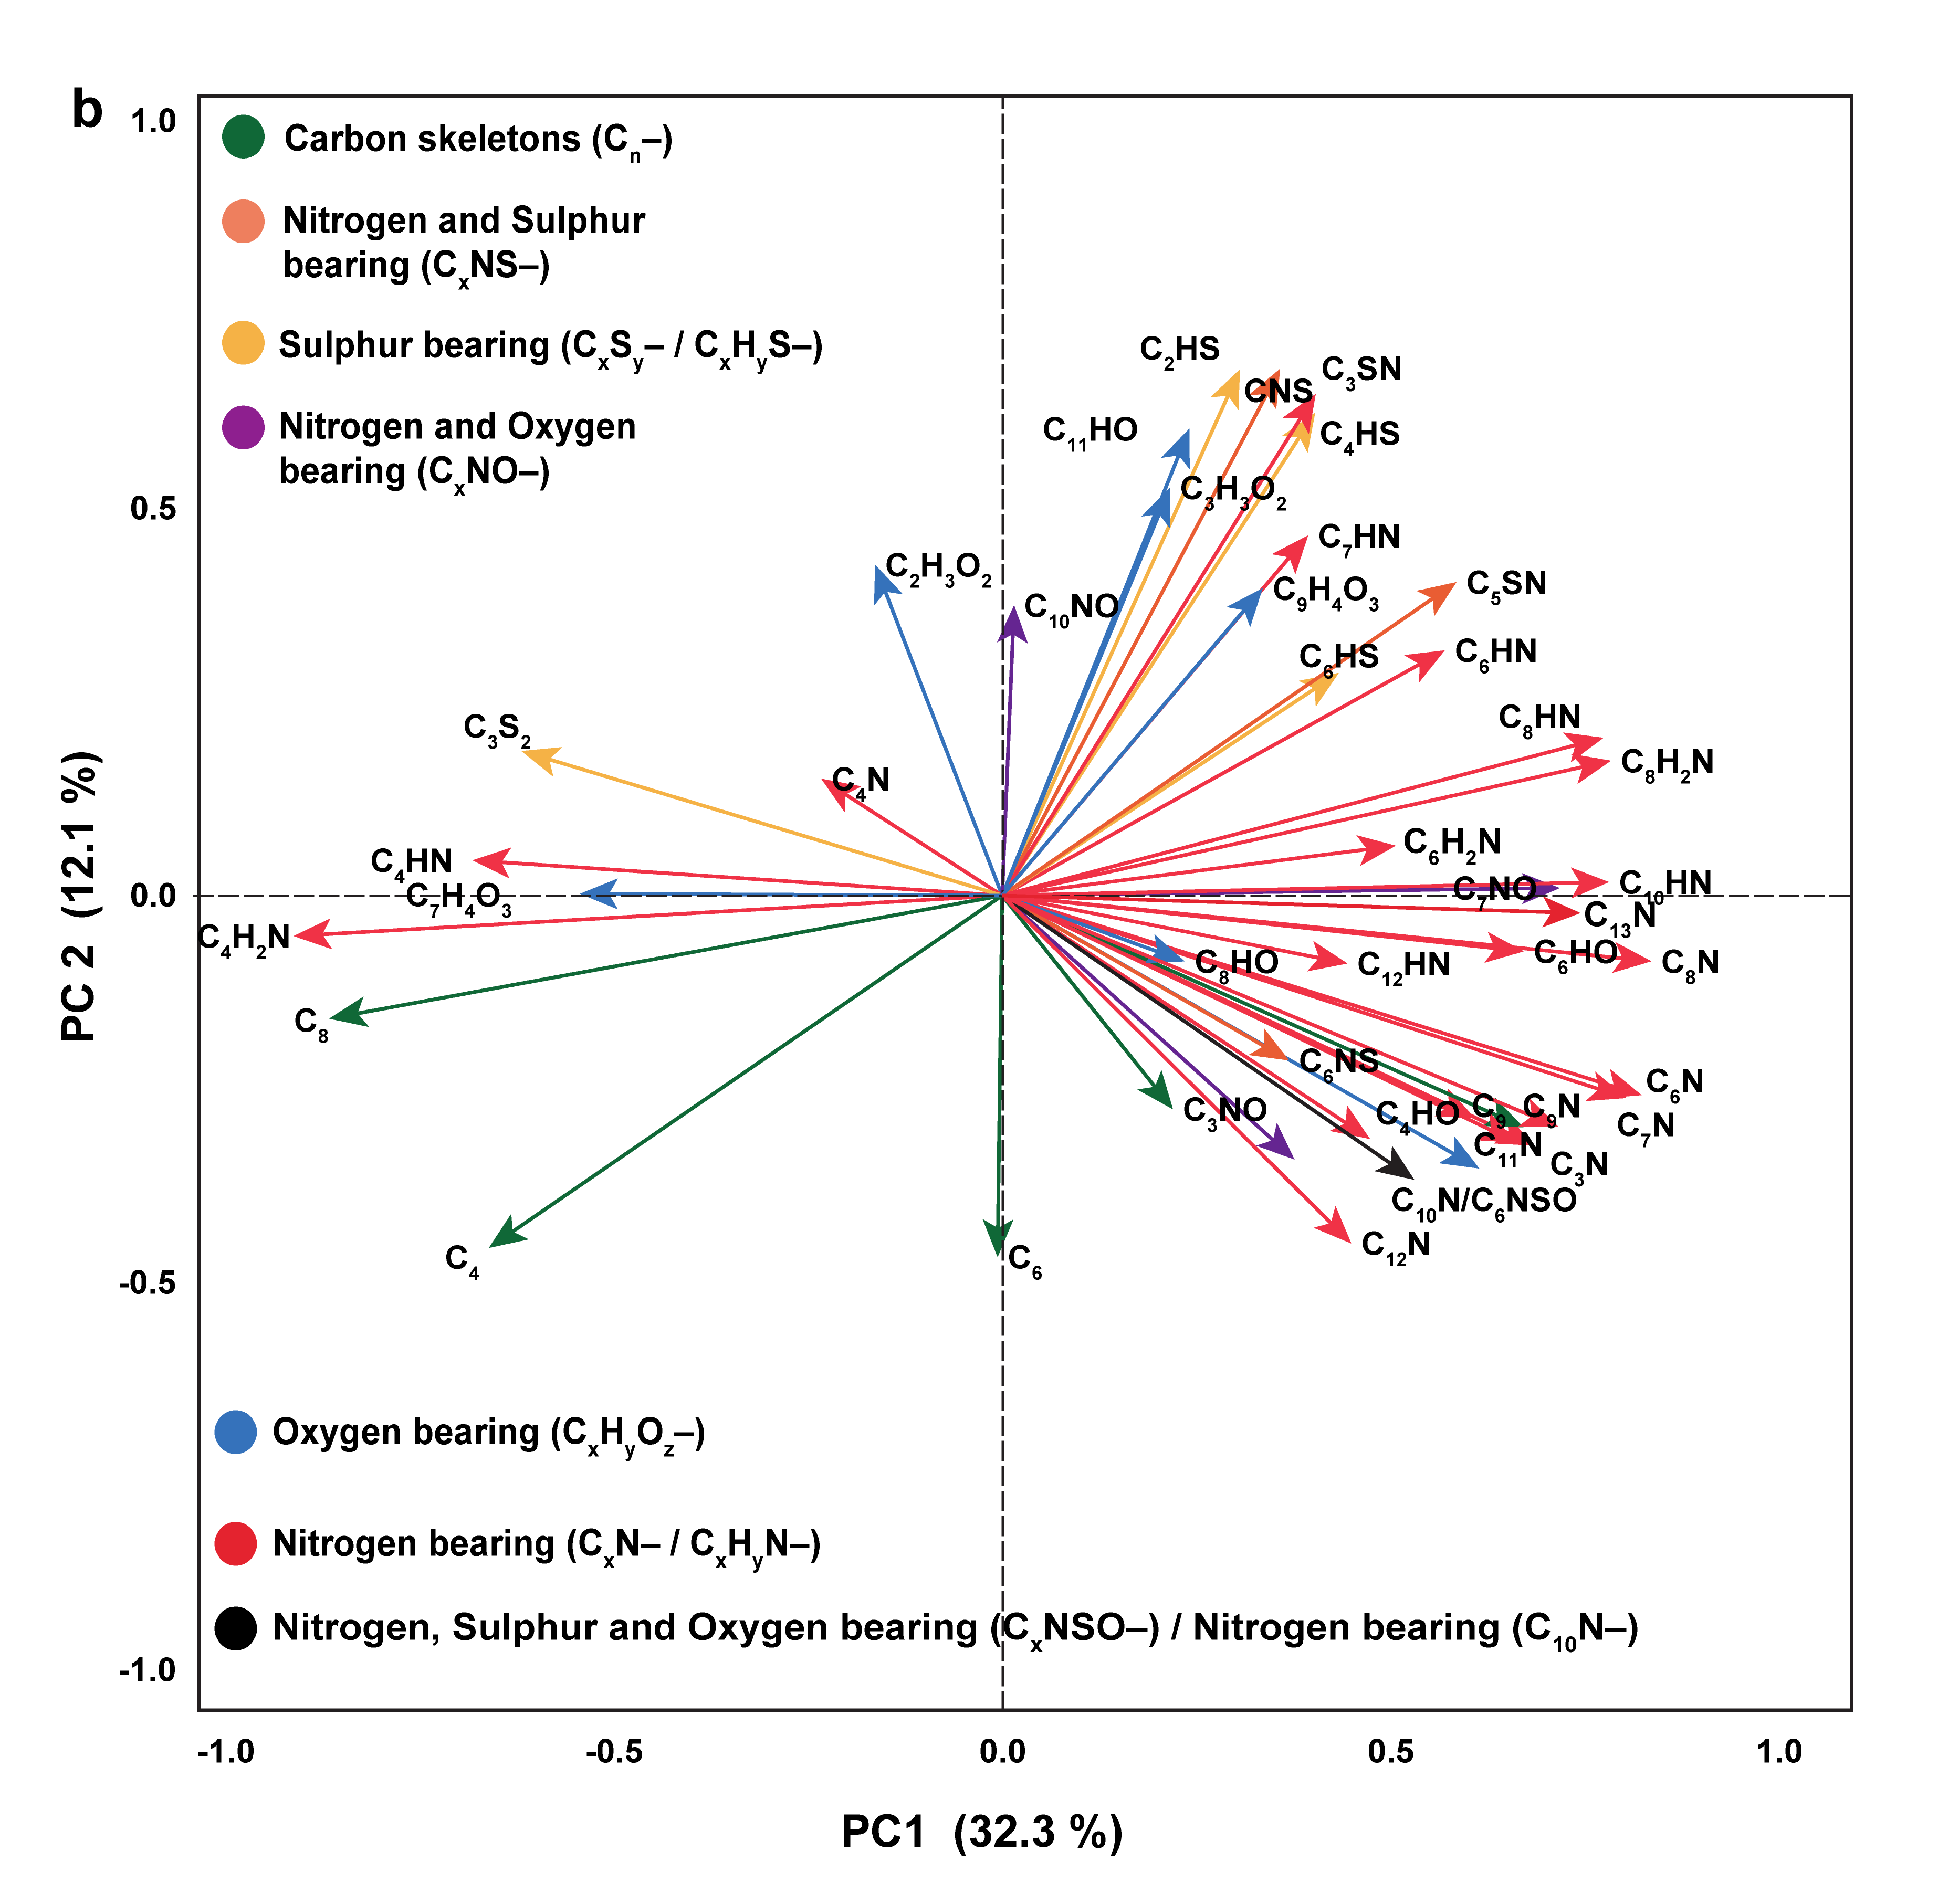


**References**

1. Colleary C*, et al.* Chemical, experimental, and morphological evidence for diagenetically altered melanin in exceptionally preserved fossils. *Proceedings of the National Academy of Sciences USA* **112**, 12592-12597 (2015).

2. Clements T, Dolocan A, Martin P, Purnell MA, Vinther J, Gabbott SE. The eyes of Tullimonstrum reveal a vertebrate affinity. *Nature* **532**, 500-503 (2016).

3. Xu X*, et al.* A bizarre Jurassic maniraptoran theropod with preserved evidence of membranous wings. *Nature* **521**, 70-73 (2015).

4. Schweitzer MH, Zheng W, Moyer AE, Sjövall P, Lindgren J. Preservation potential of keratin in deep time. *PloS one* **13**, e0206569 (2018).

5. Lindgren J*, et al.* Skin pigmentation provides evidence of convergent melanism in extinct marine reptiles. *Nature* **506**, 484-488 (2014).

6. Lindgren J*, et al.* Molecular preservation of the pigment melanin in fossil melanosomes. *Nat Commun* **3**, 824 (2012).
