# Supplementary material for: Sediment-encased pressure-temperature maturation experiments chemically simulate natural diagenesis of melanin
Source: Research Square preprint supplement (doi:10.21203/rs.3.rs-106894/v1), 2020-12-11
Supplement: Supplementary file 2 [file 8c2041fc0fa50e62e95d885d.xlsx]

## Sheet: PCA whole
Theoretical m/Z					48.001	49.008	50.004	56.98	57.976	59.014	61.008	62.004	63.011	64.019	65.015	65.999	71.025	72.001	73.008	74.004	80.98	81.976	84.001	85.008	86.009	87.011	88.019	89.003	89.999	96.001	97.008	98.004	99.011	100.004	104.98	105.976	108.001	109.008	110.004	111.011	112.019	113.003	113.999	117.976	121.008	122.004	133.008	134.0036/133.9706	135.011
No.	Taxonomy	Abbr.	Stub No.	Category	C4	C4H	C3N	C2HS	CNS	C2H3O2	C5H	C4N	C4HN	C4H2N	C4HO	C3NO	C3H3O2	C6	C6H	C5N	C4HS	C3SN	C7	C7H	C6N	C6HN	C6H2N	C6HO	C5NO	C8	C8H	C7N	C7HN?	C3S2?	C6HS	C5SN	C9	C9H	C8N	C8HN	C8H2N	C8HO	C7NO	C6NS	C10H	C9N	C11H	C10N/C6NSO	C10HN
1	Chicken	ChickPHEO200 (40)	N/A	200°C	144042	930605	1776012	567330	2945166	146096	139593	249572	318668	352861	410310	775511	89535	195833	646066	737877	856488	1046284	128270	100211	164625	228688	345724	384453	209136	83562	241617	373163	154827	49186	217275	314482	106216	106126	146913	176515	102842	230904	172704	61637	63348	101142	75977	77973	88607
2	Crow	CrowEU200 (46)	N/A	200°C	350177	1011371	1824901	191734	327347	194214	188486	292284	245167	382970	215099	677063	128026	330847	508132	341885	217171	263241	198582	169448	237106	227707	326263	211843	272242	173780	370425	537216	138789	16961	82819	118413	123418	124103	163320	175422	130727	189982	150824	39507	179758	264607	81929	94631	124017
3	Chicken	CHIX200 (45)	N/A	200°C	529031	2138037	5628024	350410	2065189	254286	326385	614215	565638	1109047	1394253	1881479	156229	525682	1346023	2560304	550810	771972	313412	299359	469059	478803	781937	885843	773243	294107	679340	1129235	282425	18696	148868	274734	209604	185491	306615	325506	501991	447696	367757	146510	312937	498816	160490	63162	230330
4	Junco	JNCO200 (42)	N/A	200°C	282196	1468028	3477957	567728	2460483	236479	177471	327820	368522	738559	949415	1321938	158700	303691	946876	1492814	1825546	817169	221310	177525	276963	315818	502860	590658	464369	166501	505923	696078	184794	30468	187095	296616	170212	219454	217815	269041	358418	307239	243805	110065	245267	310547	155263	62370	208073
5	Mallard	GRCA200 (44)	N/A	200°C	858351	3731528	6002199	1036134	2723799	216959	578210	983510	831643	1366493	1720544	2091618	1136772	587191	2137153	2364870	1199398	1143194	406377	413881	580492	724568	761206	811703	538784	281130	890563	937899	422432	245223	369503	491279	236978	223818	292106	354207	405185	413292	148711	116146	373456	394249	154040	33390	215840
6	Dumetella carolinensis	D200 (41)	N/A	200°C	380720	1535230	3526487	448252	1380943	156706	204707	162552	350380	270600	732530	1081644	136896	295527	942078	1567850	633744	624600	223380	184530	303154	306778	437585	483288	377339	190057	462787	718996	170959	17443	155922	263553	154047	124706	191083	207657	288382	258726	193100	111727	225031	314494	119285	43800	136812
7	Pigeon	PIGG200 (43)	N/A	200°C	399848	1613979	3170819	371744	726379	233612	224597	357583	378100	573182	694679	1042051	108164	296917	986932	1454256	429925	429381	236086	174521	283469	277900	385645	436575	349627	165524	430510	649643	152244	17357	117714	179060	130899	132771	174430	184517	253676	220922	161639	74896	208924	280833	74924	122134	138408
8	Turkey Feather	B200 (47)	N/A	200°C	301089	1058847	2604466	241725	418831	217808	160007	381797	252470	431709	536039	888642	81579	265137	725003	1261197	212281	304887	166586	136576	237059	223818	329170	355927	304063	143528	379597	599927	136052	22590	80378	155343	101072	111373	152429	183618	234419	196023	142493	51501	190469	269876	83060	102082	114462
9	Chicken	ChickPHEO250 (48)	N/A	250°C	270542	2158274	2462555	892543	1877030	197043	307965	93346	608453	781870	267977	845458	230240	242233	1371506	974173	1174197	898253	197493	211374	279179	370644	463543	430706	259321	136368	404279	354829	141088	236434	263631	313686	129391	120793	158788	187351	228090	216108	78266	107895	210170	153435	96123	134863	239559
10	Crow	CrowEU250 (54)	N/A	250°C	481505	1444450	3786579	100637	447649	251278	216868	372475	296079	500207	281618	611545	144876	646452	432146	555304	322397	262856	276168	272984	305475	287147	407202	147126	244791	206744	662625	833059	179278	15344	84640	154810	113397	115570	194802	203935	170502	229469	156227	29647	266316	353619	73000	110457	155359
11	House Wren	HOWR250 (49)	N/A	250°C	394789	1994510	2601961	487487	910034	170822	207955	323118	319883	433862	460168	381203	90987	225603	1049690	1065293	485190	486356	167387	151743	231922	229732	289654	304831	183207	136654	490148	465397	118191	17293	163210	204596	109755	125268	134582	142483	187127	155524	109127	55187	217140	196782	88197	23058	106455
12	Chicken	CHIX250 (53)	N/A	250°C	477456	1792207	4559678	170180	776275	146879	244856	202487	423214	792712	928359	918394	170860	367575	1087287	1924893	427411	518090	217981	239225	329865	334888	550884	594646	453918	192464	538993	865907	168028	10352	92242	177048	138182	125515	203784	236078	369306	315203	239288	50823	245670	370767	68885	146955	163928
13	Junco	JNCO250 (51)	N/A	250°C	377645	1439598	3829634	291200	991556	169848	154199	351607	299677	569913	625595	643500	67412	240160	860749	1502640	1028252	596110	200818	134740	246889	254410	407889	420143	290196	169308	2189937	708583	123075	13121	122392	201042	125737	122552	167386	187456	281811	245184	158152	49308	229808	300333	86353	108313	140829
14	Dumetella carolinensis	D250 (50)	N/A	250°C	297439	1449308	2756836	268871	610118	132863	170644	328259	287629	480086	583180	521733	104420	212747	772244	1155758	382662	386488	141104	137431	208607	221251	322153	344264	212803	118612	355199	500874	116398	17653	95027	154380	90529	85873	129753	155959	206144	179861	125557	61492	168308	218390	49693	81745	107541
15	Pigeon	PIGG250 (52)	N/A	250°C	355407	1759638	2006869	303438	470667	220076	227853	359449	359233	290045	521086	462767	248126	191016	822955	812210	374280	308591	129709	142394	181891	227164	236671	332891	169982	92663	298978	338265	128348	31950	87822	122395	77734	80120	102394	121138	141368	120451	59095	37273	143134	136850	53004	67842	95470
16	Turkey	B250 (55)	N/A	250°C	405287	1439981	3666611	95878	391864	181216	221219	824841	316109	566014	659747	827790	197944	549861	1059444	1668459	288040	379989	216660	211057	306622	336659	414890	461035	318660	239491	559312	780183	191573	51052	73363	134035	118079	126395	194182	228550	287723	24680	163139	36688	258682	346270	74634	24487	146161
17	Pipidae	BigFROG (9)	N/A	Fossil	618189	1642240	1832104	70162	55930	130788	257554	298847	220234	280954	626139	779866	130552	402718	1137607	911137	155372	86594	265136	230179	283244	229262	196501	265293	221809	241942	730194	465272	123110	18974	52331	168630	163149	174787	182419	165555	143948	140066	95545	98708	319633	217484	86627	101995	86430
18	Pipidae	SmallFROG (10)	N/A	Fossil	62243	130635	90377	4651	4857	3596	20975	20071	11816	12568	25773	34255	2266	31795	75602	40737	6160	3995	17907	14126	15828	9115	7316	11728	9117	17203	42326	20674	5488	1117	6229	6305	10369	11568	9707	6335	4983	7354	8726	6160	20079	10436	7448	8521	4856
19	Fur Feather	FurBIRD (6)	N/A	Fossil	185775	457446	330734	47500	49881	23178	68589	76353	41622	46191	118373	133200	17553	101823	270338	164304	44079	43305	64703	82734	53033	41474	32123	56161	49682	62899	140974	77424	9080	10046	32092	25567	51941	48552	31836	27261	21052	27040	29592	22207	70576	33634	15978	17599	11601
20	Messel Feather	MESSEL (4)	N/A	Fossil	22412	69365	70833	3773	3741	12727	8316	12431	12782	12987	22740	41423	7867	13353	42697	30580	10675	6214	8901	9085	10408	9068	7893	10938	8379	7368	21824	15313	5388	3130	6818	7833	4359	4925	6491	5865	5224	4375	3673	6341	10430	7340	3307	7574	6012
21	Hassianicterys	HANS (12)	N/A	Fossil	13571	38075	22145	7194	7562	2231	3501	4069	2763	1854	4354	4893	2518	7790	21311	8959	6418	3338	4142	3044	3031	2503	1330	2001	1087	3279	10911	3947	1540	397	2727	1260	1528	1957	1817	1362	329	809	474	619	5037	1290	900	956	793
22	Palaeochiroptetryx	POLY (13)	N/A	Fossil	140331	299169	269920	3331	7465	282	33656	61057	33306	47276	61775	183339	810	42563	97550	56849	32837	11692	26014	21438	19608	16646	14662	19769	27658	19803	36393	49762	909	353	602	1331	16465	10861	11630	22874	7858	18461	8307	187	43193	10228	255	93	461
23	Pelobates	TADPOLE (11)	N/A	Fossil	711086	2577181	1523441	122491	107945	350767	317169	510661	423278	349273	836718	1094300	374954	374166	1491268	614842	329822	152201	269669	313977	339661	293800	214782	367678	277023	165586	524941	301818	174927	48443	155465	152385	148419	307349	210519	211381	142115	230317	141184	179788	427480	134348	183219	282411	169984
24	Keuppia	OCTOPUS (2)	N/A	Fossil	70298	106793	216559	11629	6063	2407	29941	21054	27603	22296	30070	111564	5948	21386	71590	57322	23692	12871	41713	28418	31246	15724	11696	32423	23531	43717	85501	69589	12774	2433	10730	20297	23555	14453	24839	6923	34922	17231	12284	25972	22070	15903	10974	11365	7736
25	Glyphiteuthis	SQUID (3)	N/A	Fossil	333593	739112	990466	80483	79632	11399	113648	143877	123068	90766	206427	504718	10747	190878	394177	346381	163599	94075	140446	105465	144978	119335	138622	143043	159667	166083	335849	329562	54988	33965	73126	83785	85833	94002	117963	101799	93170	98098	80362	52687	203891	182580	64984	84672	92423
26	Indeterminate Cephalopod	OLDSQUID (1)	N/A	Fossil	334043	745680	1116796	78662	85259	20988	113541	148096	122497	152261	118028	348643	18804	205788	513695	553490	182375	93684	137944	105153	141994	116848	138751	123046	152233	180163	528480	326620	81567	41929	72101	102753	105447	74095	116139	96749	65537	103264	90798	51558	203019	189147	72394	83940	91128
27	Messelornis	MESSELORNIS (5)	N/A	Fossil	27179	111468	110323	5411	7256	171399	17298	14894	15844	28387	38716	69147	75138	10618	59334	27079	20339	11490	26516	11275	22022	46834	15892	17900	14123	13128	54840	27173	44099	2344	3622	7646	10086	11622	14701	26886	18729	13954	5930	12745	16799	12884	6317	7016	6555
28	Palaeobatrachus Eye	MesselFROG (7)	N/A	Fossil	28967	74850	74329	3238	2333	4456	10239	12267	10212	9967	18070	29013	3766	16316	45495	31967	4712	3527	10203	8840	10114	7238	6093	8904	9015	8425	21918	15303	4047	2095	3916	2840	4836	5877	6208	5227	2946	4124	2829	6341	11045	6808	2843	3046	3871
29	Palaeobtrachus Skin	FROGnerve (8)	N/A	Fossil	242648	559403	527343	24548	32393	36434	98083	97385	367477	85375	140937	228705	29003	135015	346813	240339	41500	30028	81660	70202	81469	63426	47498	69501	67993	74817	197564	120495	43773	22151	33521	44810	78217	67665	54639	44829	39699	44439	50562	45798	102087	69199	42280	51882	32956
30	Cyclostome eye	LAMPREYeye (14)	N/A	Fossil	30672	104438	84566	3418	2443	7884	13771	21303	17077	15957	26619	38354	12188	22940	70917	36001	8214	7085	14785	13632	11911	9746	7339	10588	9208	14783	43187	19566	6476	4873	2679	3661	8621	5906	4452	4285	2780	5771	2668	6501	22841	9722	5241	8134	4202
31	Tullymonstrum	Tullymonster_1	N/A	Fossil	111134	362637	177109	16362	4136	47809	43159	9679	28940	4109	70634	62832	4385	9264	204903	84843	38545	9927	29505	28482	31215	30016	18108	36750	15774	25394	88433	40408	17352	7882	5079	3495	16462	20183	18410	17582	12157	13473	5017	1663	64357	20600	12191	15174	12314
32	Tullymonstrum	Tullymonster_2	N/A	Fossil	466926	1209352	535026	44175	11887	101879	161166	152056	92173	51792	196851	159251	71139	234312	689037	263684	88022	40514	133630	130700	109843	79623	52225	93595	48133	114396	348344	148953	52949	5731	21866	15150	78354	89303	71182	55235	38495	37591	15745	8132	226369	76382	48039	54640	40790
33	Yi qi	AR5_610_	814	Fossil	28405	106251	55527.2	8783.7	15373.7	31580.8	48422.7	98533.9	27234.2	17827.6	30938.1	59590.3	26872.6	19744.9	71282.4	27900.8	8753.81	4140.61	15562.9	16764.9	14475.9	13186.1	10343.9	21421.4	15786.3	18118	45948.3	14746	11842	5832.06	8666.04	4336.11	3759.09	9315.07	11384.1	8773.87	6671.23	28269.8	9744.31	7185.5	52688	10764.3	11194.6	7103.71	7104.71
34	Yi qi	AR5_611_	814	Fossil	41615.8	151248	71011.2	15210.4	26282	59997.5	77741.1	238097	36795	28234	42792.9	79740.5	47734.4	26843.8	104508	35929.1	9593.61	4913.73	19316.1	24818.5	20971.2	21696.5	14475.7	40879.6	21224.9	17528.2	45618.3	16877.6	19220.1	7585.87	13181	5679.85	4920.16	11058.1	13240.1	8978.24	8274.3	34877.3	12591.2	8251.44	75007	12926.4	17211.8	8398	8400
35	Sapeornis	AR5_710_	808	Fossil	94094.8	267153	174357	175263	351960	613720	80958.9	5.14358e+06	129199	200360	167452	267018	1.15172e+06	95030.4	871038	103578	133324	76652.7	86571.6	160852	267197	558843	88672.4	125629	55552	184004	895795	77103.2	625243	91100.5	47405.5	27596.3	26284.4	44396.8	49855	45700.1	141646	139706	153422	69798.6	217762	42746.7	35206.6	38369.9	38364.9
36	Chicken	ChickPHEO (24)	N/A	Unmatured	280650	1147359	3066899	525729	1445278	425927	208482	355151	397490	515003	383300	1898954	743663	273037	629608	790244	781367	1213482	388388	356061	363714	443898	427482	409672	545679	368636	652725	750888	443001	65290	248673	466324	212375	130854	331876	425461	223859	376484	311949	695595	145563	243740	175329	248606	159586
37	Crow	CrowEU (31)	N/A	Unmatured	175141	677295	1777389	210687	459902	285378	127644	202636	214874	382263	543174	1299272	308840	206416	539743	834412	310534	373149	199485	151331	207904	228999	260281	302280	350276	127590	325274	433473	195591	23142	90743	148361	152390	114766	144321	179785	196378	198051	145108	166961	141059	209553	90282	200279	114861
38	House Wren	HOWR (25)	N/A	Unmatured	186981	893656	1987012	564287	1374602	234048	145303	273740	294302	586909	869375	1606330	1051800	423321	698558	913938	1283725	1133470	428193	127205	332210	349615	380006	448669	390953	390141	1102671	597305	500945	27502	167826	364348	175539	100286	348842	505000	335561	580388	264883	147260	192941	262285	171649	100299	144114
39	Chicken	CHIX (30)	N/A	Unmatured	396712	1386618	3545021	351401	656414	50037	244927	455006	485461	924918	1297587	2728727	623836	451205	836068	1713151	628159	599560	356436	179702	426469	453778	641035	743951	819733	229970	593820	888877	349916	62573	120989	265414	217494	217110	333426	437117	470962	521465	373972	282932	245382	409068	96228	361942	207484
40	Junco	JNCO (27)	N/A	Unmatured	173585	705796	1526369	353132	699001	650181	134904	204075	225185	451162	688306	1268582	1091412	443515	619666	748128	1051879	501211	581689	291867	344979	329122	269306	335503	260034	653121	329171	576097	630963	99392	102870	161487	181728	222047	330111	522399	301343	520872	217282	56018	181887	230433	144277	158416	197431
41	Mallard	GRCA (29)	N/A	Unmatured	434346	1709066	4478449	424873	758958	885239	323318	499351	514742	953210	1288479	2927965	766873	484912	1516763	2186028	594612	594307	508422	443275	543220	635383	669920	793845	807264	355996	815978	1118153	465044	62160	187664	287387	315650	400960	364245	454704	504678	563702	383934	347663	351150	526287	254173	459737	321219
42	Dumetella carolinensis	D (26)	N/A	Unmatured	152016	904550	1210255	545575	810295	780083	154955	313494	282402	412860	331280	961037	780496	314107	524822	361113	627820	465106	385255	115528	338751	265753	228700	208404	243827	205013	226340	408819	453659	139968	117931	167318	178009	246368	222798	327903	188522	156628	279291	312087	159706	224520	191670	237986	191439
43	Pigeon	PIGG (28)	N/A	Unmatured	200166	1071139	1746358	473328	726929	248335	159097	348486	352781	543078	882672	1468608	717394	486829	723915	915065	643468	524279	485522	130634	373935	337255	324957	400221	403348	153753	339681	524501	457773	81933	129382	203453	173724	215292	276227	397451	281596	447260	242547	211605	170387	235649	147293	251379	195286
44	Turkey	B (32)	N/A	Unmatured	596078	2430058	6218045	631325	1376310	148719	394205	960401	756795	1309666	1810570	4367675	651026	664333	1723142	3025468	771940	1109978	576843	426913	680922	722860	948177	1075786	1190829	361322	1052872	1551325	558944	37168	256447	494491	297215	333693	493903	631415	690298	693484	506405	365250	491592	697927	297230	588536	345639
45	Pigeon	PIDGprox (37)	N/A	Unmatured	19607	68056	187041	20097	49934	11990	13024	22379	23966	38896	28878	95935	24554	21560	50718	87795	33298	40176	21989	17033	22728	22030	14137	30506	34628	13187	25352	33962	18957	7594	10532	12382	9294	11832	17092	18547	13176	23024	18722	26242	16056	23721	6364	13010	12475
46	Pigeon	PIDGdistal (38)	N/A	Unmatured	166031	715127	1515523	220708	279131	407840	33232	210159	261790	350131	335005	1052465	294986	228823	599033	774819	395600	369354	236792	215672	254072	297698	162639	294883	350693	180265	346120	439453	259656	206107	106146	132207	91632	112136	185422	216634	125644	240427	152067	129482	87800	12550	76429	126983	121114
47	Frog Liver	FROGliver (35)	N/A	Unmatured	195581	619880	1607305	239542	457533	270980	113689	205450	194920	324576	311158	981187	155340	165366	239427	502973	346943	323326	202282	176368	206199	245880	258487	208566	356211	174098	324590	439135	188020	150539	147396	233390	123739	103706	162422	195053	143723	208927	153104	117283	145345	189986	62772	106002	123053
48	Frog Eye	FROGeye (33)	N/A	Unmatured	244816	1030132	1928671	175595	296410	2055156	183657	298396	318369	581832	446012	1614236	2221973	194479	752480	640168	685734	340204	345413	311599	306115	1010177	392521	285969	470336	206150	1138352	729674	555335	445613	112142	170106	150170	200608	541559	663500	416491	306195	244962	156770	226586	299189	185232	196111	276763
49	Frog Eye	FROGeye (34)	N/A	Unmatured	278994	1192806	2699409	326853	593865	2001505	165464	402513	397224	855376	823099	1965563	1064087	271955	879034	880161	613645	515291	501877	468304	452908	743160	545649	509663	682000	734291	1949676	778547	1072147	653535	182472	300111	414621	442819	475940	690235	704139	573540	477981	204155	291671	409902	230000	327816	255811
50	Magpie Feather	MAGfeather (39)	N/A	Unmatured	441508	1337689	3065346	382309	744941	425153	233984	414896	373961	657364	516668	1792528	388693	375741	658524	1035284	636703	634669	457550	382634	443959	460206	484582	439237	599062	362003	815775	968014	397710	325058	176294	285833	193375	257694	316674	383158	395758	441933	269479	142920	296943	475142	151476	222863	214172
51	Eumelanin Standard	PUREMEL (36)	N/A	Unmatured	807355	2431855	5332415	135812	327806	466583	495568	645020	607938	987138	1579260	3027018	772800	578734	1648100	2221014	295010	371916	1209245	543761	835235	599069	593597	641061	793018	486590	1436586	1204756	588891	622500	208044	263324	590773	857578	608205	871374	556302	601909	424176	1032761	645379	562281	488889	831096	468149
52	Wrinkled Hornbill - Black	AR8_220_	1031	SEM~190°C	62846.4	52958.8	206273	4847.35	6992.66	5399.95	21909.6	39984	25213.6	209220	49543.9	119493	6173.28	26617	29015	106962	12220.3	15010.8	17846	8805.56	23860.3	17068.3	33231.6	28202.6	50425.8	51330.4	35080.2	46757.7	10723	13002.1	5574.32	9626.99	6672.75	11491.9	12359.4	12344.1	10725.9	18055.5	17361.8	22573.6	14815.4	22110	6864.51	18966.1	8632.6
53	Common Pheasant -Reddish Brown	AR8_511_	1041	SEM~190°C	66292.1	54479.9	125576	6341.12	8867.18	7530.34	26988.1	32993.3	19651.2	215127	36308.6	74698.7	7631.69	21961.7	23017.9	56105.9	14277.9	16864.9	12029.9	6239.63	11472.4	11624.9	16212	14943.4	24600.2	51581.4	29309.5	18691.7	6237.04	10373.7	5828.23	7467.98	5642.08	5594.83	5702.58	4474.13	4787.58	5901.34	10355.1	9352.99	12061.4	8782.11	3661.29	5442.98	4844.76
54	Pigeon - Grey	AR8_720_	1035	SEM~190°C	13353.1	7580.99	9762.14	788.41	1007.67	874.28	2194.42	3116.06	1545.1	27724.3	2397.74	4546.36	491.16	3480.82	3191.62	4371.45	1827.31	1599.68	1177.95	596.24	749.39	593.24	826.98	824.6	1203.97	9382.63	2526.18	1491.46	502.18	562.72	563.21	600.24	399.11	522.19	523.19	301.07	295.06	209.05	353.09	626.27	1567.64	764.47	347.09	510.17	510.17
55	Wrinkled Hornbill - Black	AR8_611_	1037	SEM~190°C	68810.8	64469.4	263107	4222.89	7315.35	6976.29	27597.7	48643.7	41588	191618	54951.4	148346	4666.21	33878	39170.7	139930	12684.9	13219.1	26408.1	12167.5	32551.8	20421	41458.8	33161.5	59419.9	49997.1	37525.5	63225.6	13675.9	14255.7	5822.17	7921.28	7497.7	15162	16422.9	16807.2	14010.2	22640.9	18818.9	28140.6	15696.6	29617.2	10184.2	25215.6	9944.8
56	Pigeon - Iridescent	AR5_110_	1038	SEM~190°C	62073.8	65957.5	129695	8349.2	9002.16	13197.4	27690.1	27142.6	30829.4	211357	35775.1	84088.5	10083.1	25301.5	33682.6	62372.8	11703.6	13451.6	14372.5	8835.8	14007.5	12065.5	17022	17017.7	27663.1	47413.8	32643.9	25533.3	7615.19	9314.73	5990.08	5757.67	5973.38	8991.02	11011.2	7427.94	6124.88	7545.55	8871.31	12864.2	11521	12201.4	5757.34	12456.2	12455.2
57	White-rumped mannikin -Black	AR4_510_	1077	SEM ~200°C	12702.9	25268.2	145375	1551.01	2481.88	2655.41	11532.5	19424	24973.2	53811.5	21812.5	350997	9456.24	6299.34	11357.8	33897.8	5318.81	3750.68	8224.87	4105.35	9879.4	7187.75	34732.7	39229.1	85105.9	25280.8	11902.3	11562.4	4437.63	6177.7	4966.6	8503.18	6067.15	5304.64	9368.44	6286.88	5517.59	176160	20859.6	14703.8	5922.77	5536.88	6833.07	9966.18	9964.17
58	Shrenck's Bittern - Reddish Brown	AR4_610_	1078	SEM ~200°C	30945.3	37644	79375.4	3952	6956.19	10341.6	22880.2	16774.7	19841.5	42157.3	12151.8	33612.5	2831.45	15498	18394	36637.9	4673.56	6566.56	9650.02	4662.01	6890.08	4677.82	6225	6204.08	10523.6	10716.6	9207.96	12697.8	2749.18	6929.2	2984.97	2586.68	3794.8	4865.87	5270.76	3283.08	2335.39	2896.51	2740.11	6656.67	6384.08	5838.74	2508.64	4625.15	4625.15
59	Shrenck's Bittern - Grey	AR4_710_	1079	SEM ~200°C	15847.2	20449.8	23732.7	3154.23	2505.06	11530.2	25217.4	10760.1	13630	26254	6778.3	13784.1	3375.23	6384.31	8094.65	9013.5	2788.25	1800.48	3428.33	2344.4	2316.45	3917.73	3048.66	3308.75	3617.05	5947.46	3511.52	3153.68	1735.25	8202.09	1337.76	1275.61	950.39	1552.06	1611.16	1028.48	896.33	1192.56	1202.54	1770.35	4157.77	1735.22	1168.51	1297.67	1296.67
60	Pigeon-iridescent	AR4_810_	1080	SEM ~200°C	6965.25	7391.76	13886.9	1102.51	1068.54	4845.48	7988.29	4658.85	4945.23	14446.1	2944.89	9640.19	1086.51	2864.8	3532.61	5925.71	1161.5	903.36	1796.42	1051.46	1510.01	1413.8	1707.17	1870.52	2452.68	3831.49	2057.81	2650.18	835.27	2794.8	607.14	753.18	493.1	1013.43	1145.57	810.28	609.15	1361.77	857.26	1329.74	2219.8	1471.85	725.19	1309.66	1308.66
61	Common Pheasant -Reddish Brown	AR8_321_	1026	SEM ~225°C	23431.2	16878.1	38393.1	1431.4	1740.07	3635.66	11496	9954.95	12595.4	69400.5	9167.58	22093.1	1234.05	6849.56	8556.08	17675.1	3896.56	4032.22	3755.61	2115.06	3950.63	3110.57	5537.03	4596.38	7059.72	23945.5	10187.2	7913.41	1935.68	3272.39	1275.16	1676.95	1283.18	2160.26	2867.64	1951.69	1993.78	2139.36	2181.3	3614.04	3700.6	3816.03	1599.78	4027.06	1576.77
62	Turkey - iridescent	AR8_411_	1028	SEM ~225°C	14647	10071.4	24085.5	1019.68	1186.92	2103.89	9983.57	7520.66	6543.78	42065	7023.08	15029.9	1146.86	3158.5	5003.23	12324.4	2787.07	2908.56	2519.19	1383.26	3227.8	2786.07	4363.46	3617.65	5733.51	12300.6	6840.4	5185.61	1466.45	3567.45	678.31	1409.33	669.31	1213.98	1528.55	1072.77	1065.76	2169.16	2178.12	2415.87	2796.13	2531.24	701.33	2161.07	1244.03
63	Wrinkled Hornbill - Black	AR8_711_	1030	SEM ~225°C	15300.8	8822.17	11646.8	830.44	1022.65	707.61	1671.25	2982.51	1332.93	31628.9	2667.36	5383.63	529.18	4112.27	3686.31	5137.12	1850.28	1765.94	1440.3	686.3	897.53	728.34	859.11	908.71	1433.31	9942.66	2775.79	1679.77	548.2	428.19	588.22	627.27	418.12	576.22	568.21	325.08	343.08	229.05	373.09	755.38	1520.48	780.49	338.08	550.2	379.09
64	Pigeon - Grey	AR8_820_	1045	SEM ~225°C	62846	52959	206273	4847	6993	5400	21910	39984	25214	209220	49544	119493	6173	26617	29015	106962	12220	15011	17846	8806	23860	17068	33232	28203	50426	51330	35080	46758	10723	13002	5574	9627	6673	11492	12359	12344	10726	18056	17362	22574	14815	22110	6865	18966	8633
65	Common Pheasant -Reddish Brown	AR9_111_	1065	SEM ~250°C	16055.8	12079.1	3321.69	1801.68	1216.77	4889.93	13133.4	9266.6	8197.73	43647.6	3397.95	3149.12	877.4	3793.37	4625.93	1638.39	2974.66	1831.81	1166.72	979.5	648.22	712.27	1729.37	1402.11	769.32	13628.5	3148.21	1121.68	986.52	4751.86	870.41	1159.71	328.07	460.12	376.08	240.04	239.03	176.02	313.06	254.04	4132.96	970.54	525.15	387.08	627.22
66	Wrinkled Hornbill - Black	AR9_211_	1058	SEM ~250°C	61500.6	59754.1	79057.6	4643.58	4194.46	11993.1	38318.8	25145.1	66854.6	173158	20913.3	43257.6	3123.29	21620.6	30120	33593.4	9161.55	8590.84	10276.7	6231.99	7961.42	5645.26	10281.9	9168.34	12929.6	52193	22359.8	13659.2	3964.67	9192.27	3754.7	3854.29	2793.35	5662.33	7169.87	3840.11	5002.72	2750.2	3537.88	8085.47	9809.14	6606.43	3764.76	7497.41	3225.74
67	Pigeon - Grey	AR9_321_	1061	SEM ~250°C	41169.7	27303.1	16044.3	3557.43	2647.59	8396.54	28865.8	14783.7	36215.6	121735	8489.71	12730.2	1989.05	9794.68	11875.5	6689.78	6471.98	5483.49	2942.52	2023.12	1828.79	1812.72	4052.49	3402.95	3169.18	41037.8	11712.2	4094.6	1875.82	8595.67	1726.58	1906.95	990.54	1563.29	1629.4	943.5	966.5	653.24	1056.6	1535.24	5955.34	2464.33	1221.78	1488.15	1378.01
68	Turkey - iridescent	AR9_410_	1056	SEM ~250°C	20364.2	14443.3	14096.2	1885.07	1532.37	4679.56	20076.8	10736.3	14378.5	62174.3	5705.82	9155.45	1736.77	4681.69	5866.8	6486.39	3663.09	3517.29	2033.5	1377.13	1722.75	2104.58	2841.8	2393.36	2859.78	18888.5	9119.38	3052.46	1419.21	7041.81	1132.78	1524.39	773.37	1031.64	871.46	691.3	663.27	809.4	1141.78	1104.75	4502.94	1785.08	730.32	1097.71	1054.68
69	Turkey - iridescent	AR9_510_	1057	SEM ~250°C	19852	12297.1	12120.8	1560.43	1350.07	4762.71	18110.5	8981.89	12059.6	49471.4	4373.12	7544.99	1195.84	4897.9	5768.28	5797.47	2933.22	2588.94	1886.16	1228.9	1494.34	1418.19	2279.08	1860.04	2211.86	16829.7	5493.61	2782.54	1099.73	5370.67	852.45	1084.71	601.22	1003.6	1137.79	764.35	820.41	580.21	731.33	1200.86	3335.55	1576.57	796.38	1261.95	913.5
70	Common Pheasant -Reddish Brown	AR9_611_	1064	SEM ~250°C	17428.9	13189.3	3573.83	1969.09	1512.23	9130.18	34005.4	13152.7	16222.5	47702	3816.81	3487.55	951.49	3887.08	5110.91	1784.72	3650.27	2078.38	1429.14	1168.74	715.29	815.37	2423.17	1659.49	745.31	14064.7	3240.77	1226.83	1117.69	11766.5	885.44	1366.03	311.06	488.14	473.13	342.07	299.05	277.05	420.1	340.07	4976.43	1051.65	689.27	536.16	736.31
71	Wrinkled Hornbill - Black	AR9_720_	1059	SEM ~250°C	80073.7	70782.2	72031.2	6909.16	5973.09	18969.8	38239.4	34779	74063.9	242888	24507.4	42000.3	4607.88	24496.6	32707.5	30460.7	13982.2	11744.5	9662.45	6426.1	7648.05	6766.46	13330.6	10666.2	12544	73885.8	28635.1	13589.7	5648.4	8623.09	5042.14	6305.63	3145.25	5216.01	5982.47	3651.02	4125.86	2503.48	3580.71	6832.99	15540.1	6698.57	4311.64	6801.88	4207.27
72	Pigeon - Grey	AR9_820_	1060	SEM ~250°C	71035.8	49246.2	25541.1	6759.42	5083.86	17417.5	53314.2	26682.3	70650.1	251939	15701.4	23297.7	4138.16	17741	21104.1	10991.6	12326.9	11065.5	4904.23	3614.13	3079.31	3528.78	7684.8	6358.75	5446.02	76077.2	20824.5	7182.8	3599.04	17278.8	3300.95	3901.35	1815.88	2819.38	2752.2	1762.72	1631.48	1182.81	1872.96	2408.21	11535.9	4409.6	2198.66	2396.16	2549.61
73	Wrinkled Hornbill - Black	AR5_510_	1053	SEM ~300°C	12729.6	13167.7	4770.03	2354.34	2151.28	13121	27536.7	8009.57	22836.3	42405.7	4217.11	8735.74	3017.15	3210.6	4635.41	1519.08	2321.1	1698.3	1195.56	1473.9	1005.41	1918.36	3182.08	2618.79	1731.3	8847.38	3031.07	925.38	1572.99	5776.73	1060.47	1597	526.12	471.08	389.07	290.04	364.06	1943.74	785.21	381.05	4387.07	1094.43	1010.41	655.14	653.14
74	Common Pheasant -Reddish Brown	AR8_120_	1047	SEM ~300°C	95477.1	76335.4	252272	6921.32	9386.85	6500.19	29142	53665.3	35828.7	358200	67260.5	156439	11090.7	34577.9	37917.2	126823	18573.7	24927.5	23426	11497.2	29452.8	24706.4	39895.3	33923.9	59164.4	87164.5	54683.9	52858.4	13460.1	15047.7	7301.85	11478	7312.16	12138	13127.6	13159.6	12006.9	19748.1	21667	23741.7	19346.4	23649.5	7006.59	18445.2	10220.7
75	White-rumped mannikin -Black	AR4_110_	1073	SEM ~300°C	20599	11882.2	7659.2	2485.62	1956.81	10663.1	19663	8414.75	14656.9	77817.5	4325.58	15146.9	2496.8	4451.14	5244.53	1825.53	3160.08	3420.46	1152.56	1150.55	983.39	1718.19	2924.55	3633.63	2221.12	25219	6378.17	1989.79	1324.72	6258.53	1053.43	1486.84	596.15	579.12	534.11	336.04	469.08	2276.26	696.17	528.11	3563.85	1058.4	774.2	487.07	487.07
76	Shrenck's Bittern - Reddish Brown	AR4_210_	1074	SEM ~300°C	14478.5	19414.3	126772	1627.16	3218.95	8633.41	27404.6	21519.9	24077	60918	15316.8	277259	6331.87	4151.76	5499.69	22056	11230.8	5204.59	4566.89	2830.45	8545.14	5263.38	30353.1	32019.4	64595.7	21543	8260.47	5723.51	3524.84	9292.13	3380.44	6295.26	3651.66	2102.69	3124.83	3086.06	2762.89	78438.1	10972.5	8277.45	5183.91	2464.12	3759.49	4550.01	4545.01
77	Shrenck's Bittern - Grey	AR4_310_	1075	SEM ~300°C	1299.79	1104.61	1677.38	246.02	223.02	1659.6	3246.39	1514.34	981.64	2113.13	482.1	2990.34	279.03	364.06	440.08	354.06	289.03	196.01	282.03	243.02	286.03	352.05	479.1	530.12	586.15	656.19	227.02	147.01	202.01	1064.96	156.01	252.02	95	132.01	99	95	119	726.24	175.01	157.01	527.11	197.01	196.02	134	134
78	Pigeon-iridescent	AR4_410_	1076	SEM ~300°C	569.15	136.01	99.01	96	88	143.01	367.09	185.02	131.01	230.02	63	114	100	91	94	70	129	80	88	76	87	122	88	84	79	133.01	97	82	85	106	95	112	65	80	81	79	93	83	97	87	90	91	90	89	89
79	Wrinkled Hornbill - Black	AR5_410_	1052	SEM ~300°C	18519.4	18421.4	4341.04	3458	3600.38	14889	25796.2	8008.83	30749.1	68181.8	5815.38	7538.02	5006.56	4747.12	6604.28	1839.57	3453.97	2671.3	1413.79	1844.45	1177.55	2005.54	4366.19	3225.03	1820.42	13453.6	5272.48	1390.86	2039.67	4127.66	1515.97	2240.06	718.23	588.13	608.14	288.04	517.11	1081.5	1037.35	468.08	5012.36	1369.61	1329.7	809.22	809.22
[truncated: 11 more columns]

## Sheet: PCA Norm
Theoretical m/Z					48.001	49.008	50.004	56.98	57.976	59.014	61.008	62.004	63.011	64.019	65.015	65.999	71.025	72.001	73.008	74.004	80.98	81.976	84.001	85.008	86.009	87.011	88.019	89.003	89.999	96.001	97.008	98.004	99.011	100.004	104.98	105.976	108.001	109.008	110.004	111.011	112.019	113.003	113.999	117.976	121.008	122.004	133.008	134.0036/133.9706	135.011
No.	Taxonomy	Abbr.	Stub No.	Category	C4	C4H	C3N	C2HS	CNS	C2H3O2	C5H	C4N	C4HN	C4H2N	C4HO	C3NO	C3H3O2	C6	C6H	C5N	C4HS	C3SN	C7	C7H	C6N	C6HN	C6H2N	C6HO	C5NO	C8	C8H	C7N	C7HN?	C3S2?	C6HS	C5SN	C9	C9H	C8N	C8HN	C8H2N	C8HO	C7NO	C6NS	C10H	C9N	C11H	C10N/C6NSO	C10HN
1	Chicken	ChickPHEO200 (40)	N/A	200°C	0.00813937	0.0525856	0.100357	0.0320581	0.166422	0.00825544	0.00788797	0.0141026	0.018007	0.0199391	0.0231854	0.0438218	0.00505935	0.0110659	0.0365072	0.0416952	0.0483975	0.0591223	0.00724815	0.00566262	0.00930246	0.0129225	0.0195358	0.0217243	0.0118176	0.00472183	0.013653	0.0210863	0.0087488	0.00277935	0.0122775	0.0177704	0.00600194	0.00599686	0.0083016	0.00997432	0.00581129	0.0130477	0.00975897	0.00348292	0.0035796	0.00571523	0.00429323	0.00440602	0.00500691
2	Crow	CrowEU200 (46)	N/A	200°C	0.0263742	0.0761731	0.137445	0.0144408	0.0246547	0.0146275	0.0141961	0.0220139	0.0184652	0.028844	0.0162005	0.0509941	0.00964249	0.0249183	0.0382708	0.0257496	0.0163566	0.0198264	0.0149565	0.0127623	0.017858	0.0171501	0.024573	0.0159553	0.0205044	0.0130885	0.0278992	0.0404613	0.0104531	0.00127745	0.00623765	0.00891847	0.00929543	0.00934702	0.0123007	0.0132122	0.00984592	0.0143088	0.0113596	0.00297554	0.0135388	0.0199293	0.00617062	0.00712729	0.00934055
3	Chicken	CHIX200 (45)	N/A	200°C	0.0151816	0.0613552	0.161507	0.0100557	0.0592646	0.00729723	0.00936626	0.0176261	0.0162321	0.0318263	0.0400108	0.0539927	0.0044833	0.0150855	0.0386268	0.0734729	0.0158066	0.0221532	0.00899397	0.00859069	0.0134606	0.0137402	0.0224392	0.025421	0.0221897	0.00843998	0.019495	0.0324056	0.00810474	0.000536518	0.00427206	0.00788403	0.006015	0.00532303	0.00879892	0.00934103	0.0144056	0.0128475	0.0105535	0.00420439	0.00898034	0.0143145	0.00460557	0.00181256	0.00660977
4	Junco	JNCO200 (42)	N/A	200°C	0.0105416	0.0548388	0.129921	0.0212077	0.0919124	0.00883378	0.00662951	0.0122459	0.0137663	0.0275892	0.0354658	0.0493816	0.00592831	0.0113445	0.035371	0.0557647	0.0681941	0.0305257	0.00826713	0.00663152	0.0103461	0.0117975	0.0187846	0.0220643	0.0173467	0.00621972	0.018899	0.0260023	0.00690306	0.00113815	0.00698901	0.0110802	0.00635834	0.0081978	0.00813657	0.0100501	0.0133889	0.011477	0.00910744	0.00411153	0.00916206	0.0116006	0.00579992	0.00232986	0.00777266
5	Mallard	GRCA200 (44)	N/A	200°C	0.019797	0.0860639	0.138435	0.0238974	0.0628216	0.00500394	0.0133358	0.0226836	0.019181	0.0315168	0.0396826	0.048241	0.0262185	0.013543	0.0492912	0.0545433	0.0276629	0.0263666	0.00937267	0.00954574	0.0133885	0.0167114	0.0175564	0.0187211	0.0124265	0.00648397	0.0205399	0.0216317	0.00974296	0.00565582	0.00852221	0.0113308	0.00546565	0.00516213	0.00673712	0.00816942	0.00934518	0.00953215	0.00342987	0.00267879	0.00861338	0.00909295	0.00355277	0.000770106	0.00497813
6	Dumetella carolinensis	D200 (41)	N/A	200°C	0.0172439	0.0695351	0.159725	0.0203027	0.062547	0.00709768	0.00927178	0.00736246	0.0158697	0.0122563	0.0331784	0.0489909	0.00620042	0.0133853	0.0426695	0.0710126	0.0287041	0.02829	0.0101175	0.00835791	0.0137307	0.0138949	0.0198195	0.0218895	0.0170908	0.00860824	0.020961	0.0325655	0.00774324	0.000790045	0.00706217	0.0119371	0.00697724	0.0056483	0.00865471	0.0094054	0.0130617	0.0117185	0.00874607	0.00506045	0.0101923	0.0142444	0.00540277	0.00198383	0.00619662
7	Pigeon	PIGG200 (43)	N/A	200°C	0.0196094	0.0791528	0.155503	0.0182311	0.0356231	0.0114568	0.0110147	0.0175366	0.0185428	0.02811	0.0340685	0.0511043	0.00530458	0.0145614	0.0484012	0.0713197	0.0210844	0.0210577	0.0115781	0.00855887	0.0139019	0.0136288	0.0189128	0.0214105	0.0171464	0.00811764	0.0211131	0.0318598	0.00746636	0.000851223	0.00577294	0.00878147	0.00641956	0.00651136	0.00855441	0.00904909	0.0124408	0.0108345	0.00792711	0.00367305	0.0102461	0.0137726	0.00367443	0.0059897	0.00678781
8	Turkey Feather	B200 (47)	N/A	200°C	0.018483	0.0649997	0.159881	0.0148388	0.0257109	0.0133706	0.00982238	0.0234375	0.0154984	0.0265014	0.0329059	0.0545513	0.00500791	0.016276	0.0445059	0.0774214	0.0130313	0.0187162	0.0102262	0.00838402	0.0145524	0.0137396	0.0202068	0.0218494	0.0186656	0.00881078	0.0233024	0.0368278	0.00835185	0.00138674	0.00493418	0.00953607	0.00620453	0.00683688	0.00935719	0.0112718	0.0143903	0.0120333	0.00874725	0.0031615	0.0116924	0.0165669	0.00509882	0.00626653	0.0070265
9	Chicken	ChickPHEO250 (48)	N/A	250°C	0.0116839	0.0932094	0.10635	0.0385463	0.0810633	0.0085097	0.0133001	0.00403133	0.0262773	0.0337666	0.0115731	0.0365128	0.00994337	0.0104613	0.0592312	0.0420716	0.05071	0.0387928	0.00852913	0.00912861	0.0120569	0.016007	0.020019	0.0186009	0.0111993	0.00588932	0.0174596	0.015324	0.00609317	0.0102109	0.0113854	0.0135472	0.00558801	0.00521669	0.00685758	0.00809113	0.00985052	0.00933306	0.00338007	0.00465966	0.00907661	0.0066264	0.00415126	0.00582433	0.0103458
10	Crow	CrowEU250 (54)	N/A	250°C	0.0262998	0.0788957	0.206823	0.00549678	0.0244505	0.0137248	0.0118453	0.0203446	0.0161718	0.0273213	0.015382	0.0334025	0.00791311	0.0353092	0.0236038	0.0303307	0.0176093	0.0143572	0.0150843	0.0149104	0.016685	0.0156839	0.0222413	0.00803601	0.0133705	0.0112923	0.0361925	0.0455016	0.00979215	0.000838088	0.00462303	0.00845571	0.00619373	0.00631242	0.0106401	0.0111389	0.0093128	0.0125336	0.00853311	0.00161932	0.0145462	0.0193146	0.00398725	0.00603315	0.0084857
11	House Wren	HOWR250 (49)	N/A	250°C	0.0225121	0.113733	0.148372	0.027798	0.051893	0.0097408	0.0118582	0.0184252	0.0182407	0.0247402	0.0262402	0.0217374	0.00518836	0.0128646	0.0598566	0.0607463	0.027667	0.0277335	0.00954493	0.00865286	0.0132249	0.0131	0.016517	0.0173824	0.010447	0.00779244	0.0279498	0.0265384	0.00673962	0.000986101	0.00930674	0.0116667	0.00625857	0.00714317	0.00767428	0.00812482	0.0106706	0.00886846	0.00622276	0.00314693	0.012382	0.0112211	0.00502927	0.00131484	0.0060704
12	Chicken	CHIX250 (53)	N/A	250°C	0.0195645	0.0734384	0.18684	0.00697339	0.0318091	0.00601859	0.0100333	0.00829722	0.0173418	0.0324826	0.0380409	0.0376326	0.00700125	0.0150619	0.0445533	0.0788754	0.0175138	0.0212295	0.00893211	0.00980261	0.0135167	0.0137225	0.0225733	0.0243665	0.0186	0.00788651	0.0220861	0.0354819	0.0068852	0.000424189	0.00377976	0.00725481	0.00566222	0.00514317	0.00835036	0.00967366	0.0151329	0.0129159	0.00980519	0.00208255	0.0100667	0.0151927	0.00282267	0.00602171	0.0067172
13	Junco	JNCO250 (51)	N/A	250°C	0.016696	0.0636459	0.169311	0.0128742	0.0438375	0.00750913	0.00681727	0.0155448	0.013249	0.0251963	0.0276581	0.0284497	0.00298034	0.0106177	0.0380544	0.066433	0.0454599	0.0263545	0.00887834	0.00595697	0.0109152	0.0112477	0.0180331	0.0185749	0.0128298	0.00748525	0.096819	0.0313271	0.00544125	0.000580091	0.00541105	0.00888824	0.00555894	0.00541813	0.00740028	0.00828759	0.0124591	0.0108398	0.00699203	0.00217995	0.01016	0.013278	0.00381774	0.00478861	0.00622617
14	Dumetella carolinensis	D250 (50)	N/A	250°C	0.0183607	0.0894648	0.170178	0.0165972	0.0376622	0.00820155	0.0105337	0.0202632	0.0177552	0.0296354	0.0359993	0.0322062	0.00644578	0.0131327	0.0476701	0.0713442	0.0236215	0.0238577	0.00871026	0.00848353	0.0128772	0.0136577	0.0198863	0.0212512	0.0131362	0.00732184	0.0219262	0.0309186	0.00718517	0.00108971	0.00586596	0.00952978	0.0055883	0.00530088	0.00800957	0.00962725	0.0127251	0.0111027	0.00775055	0.00379586	0.0103895	0.0134811	0.00306752	0.00504607	0.00663844
15	Pigeon	PIGG250 (52)	N/A	250°C	0.0246151	0.121871	0.138994	0.0210158	0.0325979	0.0152422	0.0157809	0.0248951	0.0248801	0.0200882	0.0360899	0.0320508	0.0171849	0.0132296	0.056997	0.0562528	0.0259222	0.0213727	0.00898351	0.00986206	0.0125976	0.0157331	0.0163916	0.0230557	0.0117728	0.00641774	0.0207069	0.0234279	0.00888925	0.00221282	0.00608246	0.00847695	0.00538377	0.00554903	0.0070917	0.00838989	0.009791	0.00834231	0.00409286	0.00258149	0.00991331	0.00947809	0.003671	0.00469867	0.00661215
16	Turkey	B250 (55)	N/A	250°C	0.0192719	0.0684729	0.174352	0.00455912	0.0186336	0.00861705	0.0105192	0.0392222	0.0150314	0.0269147	0.0313718	0.0393624	0.00941248	0.0261466	0.0503779	0.0793373	0.0136967	0.0180689	0.0103025	0.010036	0.0145803	0.0160086	0.0197285	0.0219228	0.0151527	0.0113881	0.026596	0.0370987	0.00910953	0.00242759	0.0034885	0.00637353	0.0056148	0.00601024	0.00923359	0.0108678	0.0136816	0.00117356	0.00775746	0.00174456	0.0123006	0.0164656	0.00354894	0.00116439	0.00695014
17	Pipidae	BigFROG (9)	N/A	Fossil	0.0392752	0.104336	0.116398	0.00445758	0.00355338	0.00830931	0.0163631	0.0189865	0.0139921	0.0178498	0.0397803	0.049547	0.00829432	0.0255857	0.0722752	0.057887	0.0098712	0.00550155	0.0168448	0.0146239	0.0179952	0.0145656	0.0124842	0.0168548	0.0140921	0.0153712	0.0463912	0.02956	0.00782151	0.00120547	0.00332473	0.0107135	0.0103653	0.0111047	0.0115896	0.0105181	0.0091454	0.00889877	0.00607023	0.00627118	0.0203071	0.0138173	0.00550364	0.00648001	0.00549113
18	Pipidae	SmallFROG (10)	N/A	Fossil	0.0676299	0.141941	0.0981987	0.00505352	0.00527735	0.00390722	0.0227903	0.0218081	0.0128386	0.0136557	0.0280035	0.0372196	0.00246211	0.0345467	0.082145	0.0442626	0.00669312	0.00434075	0.0194568	0.0153485	0.0171978	0.00990386	0.00794917	0.012743	0.00990604	0.0186918	0.0459891	0.0224632	0.00596296	0.00121367	0.00676809	0.00685067	0.0112664	0.0125692	0.0105471	0.00688327	0.00541426	0.00799046	0.0094812	0.00669312	0.0218167	0.0113392	0.00809259	0.00925845	0.00527627
19	Fur Feather	FurBIRD (6)	N/A	Fossil	0.0527401	0.129865	0.0938929	0.0134849	0.0141608	0.00658006	0.0194719	0.021676	0.0118162	0.0131133	0.0336052	0.0378145	0.00498316	0.0289068	0.0767469	0.0466446	0.0125137	0.012294	0.0183687	0.0234875	0.0150557	0.0117742	0.00911947	0.0159437	0.0141043	0.0178565	0.0400214	0.0219801	0.00257774	0.00285198	0.00911067	0.00725828	0.0147457	0.0137835	0.009038	0.00773919	0.0059765	0.00767645	0.00840094	0.0063044	0.020036	0.00954844	0.00453603	0.00499622	0.00329344
20	Messel Feather	MESSEL (4)	N/A	Fossil	0.034714	0.10744	0.109713	0.005844	0.00579444	0.0197129	0.0128807	0.0192544	0.0197981	0.0201156	0.035222	0.0641601	0.0121852	0.0206825	0.0661334	0.0473654	0.0165345	0.00962487	0.0137868	0.0140718	0.016121	0.0140454	0.0122255	0.0169419	0.0129782	0.0114123	0.0338032	0.0237183	0.00834548	0.00484806	0.0105604	0.0121325	0.00675166	0.00762834	0.0100539	0.00908431	0.00809146	0.00677644	0.00568911	0.00982158	0.016155	0.0113689	0.00512222	0.0117314	0.00931199
21	Hassianicterys	HANS (12)	N/A	Fossil	0.0597557	0.167652	0.0975087	0.0316766	0.0332969	0.00982352	0.0154156	0.0179166	0.012166	0.00816352	0.0191715	0.0215448	0.0110872	0.0343009	0.0938364	0.0394482	0.0282597	0.0146979	0.018238	0.0134033	0.0133461	0.0110212	0.00585624	0.00881079	0.00478627	0.0144381	0.0480432	0.0173794	0.00678091	0.00174807	0.0120075	0.00554802	0.00672808	0.00861705	0.0080006	0.00599715	0.00144865	0.00356218	0.00208711	0.00272558	0.0221789	0.00568012	0.00396287	0.00420945	0.00349173
22	Palaeochiroptetryx	POLY (13)	N/A	Fossil	0.0778846	0.166041	0.149807	0.00184873	0.00414313	0.000156512	0.0186793	0.033887	0.0184851	0.0262385	0.0342855	0.101754	0.000449555	0.0236228	0.0541409	0.0315516	0.0182248	0.00648914	0.0144379	0.0118982	0.0108826	0.00923864	0.00813751	0.0109719	0.0153504	0.0109908	0.0201984	0.0276182	0.000504501	0.000195917	0.000334114	0.000738714	0.00913819	0.00602793	0.00645473	0.0126952	0.00436124	0.010246	0.00461044	0.000103786	0.0239724	0.00567661	0.000141527	5.16156e-05	0.000255858
23	Pelobates	TADPOLE (11)	N/A	Fossil	0.0361478	0.13101	0.0774437	0.00622679	0.00548735	0.0178311	0.0161232	0.0259593	0.0215172	0.0177552	0.0425343	0.0556284	0.0190607	0.0190206	0.0758082	0.0312553	0.0167664	0.00773709	0.0137085	0.0159609	0.0172666	0.0149352	0.0109184	0.0186908	0.0140824	0.00841752	0.0266852	0.0153428	0.00889236	0.00246259	0.00790302	0.00774645	0.00754484	0.015624	0.0107017	0.0107455	0.00722437	0.0117081	0.00717705	0.00913947	0.0217308	0.00682954	0.00931388	0.0143563	0.00864109
24	Keuppia	OCTOPUS (2)	N/A	Fossil	0.0441667	0.0670958	0.136059	0.00730625	0.00380925	0.00151227	0.0188113	0.0132278	0.0173424	0.0140081	0.0188923	0.0700933	0.003737	0.0134364	0.0449785	0.0360142	0.0148852	0.00808658	0.0262074	0.0178544	0.0196312	0.00987906	0.00734835	0.0203707	0.014784	0.0274665	0.0537185	0.0437213	0.00802563	0.0015286	0.00674143	0.0127522	0.0147991	0.00908051	0.0156058	0.00434957	0.0219408	0.0108259	0.00771778	0.0163177	0.0138661	0.00999152	0.00689473	0.00714039	0.00486037
25	Glyphiteuthis	SQUID (3)	N/A	Fossil	0.0389	0.0861872	0.115497	0.00938505	0.00928581	0.00132923	0.0132524	0.0167774	0.0143508	0.0105841	0.0240713	0.0588547	0.0012532	0.0222581	0.0459646	0.0403912	0.0190771	0.01097	0.0163773	0.0122982	0.0169057	0.0139155	0.0161646	0.0166801	0.0186186	0.0193668	0.039163	0.0384299	0.0064121	0.00396063	0.00852715	0.00977009	0.0100089	0.0109615	0.0137556	0.0118707	0.0108645	0.0114391	0.00937094	0.00614378	0.0237755	0.0212905	0.00757772	0.00987352	0.0107774
26	Indeterminate Cephalopod	OLDSQUID (1)	N/A	Fossil	0.0365415	0.081571	0.122168	0.00860495	0.00932661	0.00229591	0.0124204	0.0162004	0.0134001	0.0166561	0.0129113	0.0381386	0.002057	0.0225115	0.0561939	0.0605471	0.0199503	0.0102482	0.0150899	0.0115028	0.0155329	0.0127822	0.0151782	0.0134602	0.016653	0.0197083	0.0578112	0.0357294	0.00892273	0.00458668	0.00788723	0.0112403	0.011535	0.00810536	0.0127046	0.0105835	0.00716919	0.0112962	0.00993253	0.00564001	0.0222085	0.0206911	0.00791929	0.00918232	0.00996863
27	Messelornis	MESSELORNIS (5)	N/A	Fossil	0.0201289	0.0825539	0.0817059	0.00400742	0.00537384	0.126939	0.012811	0.0110306	0.0117342	0.0210236	0.0286733	0.0512107	0.0556477	0.00786376	0.0439431	0.0200549	0.0150632	0.00850957	0.0196379	0.00835034	0.0163096	0.0346856	0.0117697	0.0132569	0.0104596	0.00972268	0.0406149	0.0201245	0.03266	0.00173598	0.00268248	0.00566268	0.00746976	0.00860733	0.0108877	0.0199119	0.0138708	0.0103344	0.0043918	0.00943903	0.0124414	0.00954197	0.00467841	0.00519609	0.00485467
28	Palaeobatrachus Eye	MesselFROG (7)	N/A	Fossil	0.0491828	0.127087	0.126203	0.00549777	0.00396118	0.0075658	0.0173847	0.020828	0.0173389	0.0169229	0.0306809	0.0492609	0.00639426	0.0277028	0.0772455	0.0542765	0.00800046	0.00598846	0.0173236	0.0150094	0.0171725	0.0122893	0.0103452	0.015118	0.0153065	0.0143047	0.0372144	0.0259828	0.00687136	0.00355708	0.00664894	0.00482201	0.008211	0.0099785	0.0105405	0.00887488	0.00500199	0.0070021	0.00480333	0.0107663	0.0187532	0.0115592	0.0048271	0.00517178	0.00657254
29	Palaeobtrachus Skin	FROGnerve (8)	N/A	Fossil	0.0462854	0.106707	0.100591	0.00468256	0.006179	0.00694983	0.0187095	0.0185763	0.0700967	0.0162854	0.0268839	0.0436258	0.00553236	0.0257543	0.066155	0.045845	0.00791618	0.00572788	0.0155767	0.0133911	0.0155403	0.0120986	0.0090603	0.0132574	0.0129697	0.0142714	0.0376856	0.0229846	0.00834975	0.00422533	0.00639417	0.00854756	0.01492	0.0129072	0.0104225	0.00855119	0.00757263	0.00847679	0.00964476	0.00873603	0.0194732	0.0131998	0.00806496	0.00989656	0.0062864
30	Cyclostome eye	LAMPREYeye (14)	N/A	Fossil	0.0374131	0.127391	0.103152	0.00416921	0.00297992	0.00961675	0.0167976	0.025985	0.0208302	0.019464	0.0324693	0.0467834	0.0148667	0.0279818	0.0865031	0.0439133	0.0100193	0.00864214	0.0180344	0.016628	0.0145288	0.011888	0.00895197	0.012915	0.0112317	0.018032	0.0526786	0.0238662	0.00789929	0.00594399	0.00326779	0.00446561	0.0105157	0.00720402	0.00543046	0.00522676	0.00339099	0.00703935	0.00325437	0.00792979	0.027861	0.0118587	0.00639287	0.00992169	0.00512552
31	Tullymonstrum	Tullymonster_1	N/A	Fossil	0.056252	0.183554	0.0896461	0.00828184	0.00209349	0.0241992	0.0218455	0.00489915	0.0146484	0.00207982	0.0357523	0.0318033	0.00221953	0.0046891	0.103714	0.0429444	0.0195101	0.00502468	0.0149343	0.0144165	0.0157999	0.015193	0.0091656	0.0186015	0.00798422	0.0128535	0.0447615	0.020453	0.00878295	0.00398958	0.0025708	0.00176904	0.00833246	0.0102159	0.00931847	0.00889936	0.00615343	0.00681954	0.00253942	0.00084175	0.0325752	0.010427	0.00617064	0.00768052	0.00623289
32	Tullymonstrum	Tullymonster_2	N/A	Fossil	0.0661793	0.171406	0.0758314	0.0062611	0.00168479	0.0144397	0.0228427	0.0215515	0.0130641	0.00734069	0.0279005	0.0225713	0.0100828	0.03321	0.09766	0.037373	0.0124757	0.00574221	0.0189399	0.0185246	0.0155685	0.0112853	0.00740206	0.0132656	0.00682208	0.0162138	0.0493722	0.0211117	0.00750467	0.000812278	0.00309916	0.00214727	0.0111054	0.0126573	0.0100889	0.00782868	0.00545605	0.00532792	0.0022316	0.00115258	0.0320842	0.0108259	0.00680876	0.00774435	0.00578133
33	Yi qi	AR5_610_	814	Fossil	0.0249415	0.0932956	0.0487566	0.00771268	0.0134991	0.02773	0.0425184	0.0865194	0.0239135	0.0156538	0.0271657	0.0523243	0.0235959	0.0173374	0.0625907	0.0244988	0.00768643	0.00363573	0.0136653	0.0147207	0.0127108	0.0115783	0.00908267	0.0188095	0.0138614	0.0159089	0.0403457	0.012948	0.0103981	0.00512094	0.00760937	0.0038074	0.00330073	0.00817926	0.00999603	0.00770405	0.00585779	0.0248228	0.00855616	0.00630935	0.0462636	0.00945175	0.0098296	0.00623753	0.00623841
34	Yi qi	AR5_611_	814	Fossil	0.0245282	0.089145	0.0418538	0.00896496	0.0154905	0.0353623	0.0458203	0.140334	0.0216869	0.016641	0.025222	0.0469988	0.0281345	0.0158216	0.0615968	0.0211765	0.00565444	0.00289614	0.0113848	0.0146279	0.0123604	0.0127879	0.00853193	0.0240943	0.0125099	0.0103311	0.0268873	0.00994759	0.0113283	0.00447109	0.00776887	0.00334768	0.00289993	0.00651759	0.00780369	0.00529174	0.00487684	0.0205566	0.00742123	0.00486337	0.0442089	0.00761875	0.0101446	0.00494975	0.00495093
35	Sapeornis	AR5_710_	808	Fossil	0.00638149	0.0181182	0.0118248	0.0118863	0.0238698	0.0416223	0.00549061	0.348837	0.00876223	0.0135884	0.0113566	0.0181091	0.0781096	0.00644494	0.0590736	0.00702465	0.00904203	0.00519857	0.00587127	0.0109089	0.0181213	0.0379006	0.00601374	0.00852014	0.00376752	0.0124791	0.0607526	0.00522912	0.0424038	0.00617842	0.00321503	0.00187157	0.0017826	0.00301098	0.00338115	0.00309937	0.00960638	0.00947483	0.0104051	0.00473373	0.0147685	0.00289907	0.0023877	0.00260224	0.0026019
36	Chicken	ChickPHEO (24)	N/A	Unmatured	0.0107397	0.0439062	0.117362	0.0201182	0.0553067	0.016299	0.00797802	0.0135906	0.0152108	0.0197077	0.0146678	0.0726676	0.0284579	0.0104484	0.0240933	0.0302404	0.0299007	0.0464365	0.0148625	0.0136255	0.0139183	0.0169867	0.0163585	0.015677	0.0208816	0.0141067	0.0249779	0.0287344	0.0169524	0.00249846	0.00951602	0.0178449	0.00812699	0.00500741	0.0127	0.0162812	0.00856645	0.014407	0.0119374	0.0266185	0.00557029	0.00932724	0.00670935	0.00951345	0.00610691
37	Crow	CrowEU (31)	N/A	Unmatured	0.011882	0.0459492	0.120582	0.0142935	0.0312008	0.0193607	0.00865965	0.0137473	0.0145775	0.0259336	0.0368501	0.0881455	0.0209524	0.0140037	0.0366174	0.0566084	0.0210673	0.0253153	0.0135335	0.0102666	0.0141047	0.0155358	0.017658	0.0205073	0.0237635	0.00865599	0.0220673	0.0294078	0.0132693	0.00157	0.00615621	0.0100651	0.0103385	0.00778598	0.00979106	0.012197	0.0133227	0.0134362	0.00984445	0.011327	0.00956975	0.0142165	0.00612493	0.0135874	0.00779242
38	House Wren	HOWR (25)	N/A	Unmatured	0.00757069	0.0361833	0.0804523	0.0228475	0.0556564	0.00947639	0.00588319	0.0110835	0.011916	0.0237634	0.0352002	0.0650389	0.0425864	0.0171399	0.028284	0.0370045	0.0519769	0.0458932	0.0173372	0.00515042	0.0134509	0.0141556	0.0153861	0.0181662	0.0158293	0.0157965	0.0446462	0.0241843	0.0202828	0.00111353	0.00679512	0.0147521	0.00710742	0.00406049	0.0141243	0.020447	0.0135866	0.0234994	0.0107249	0.00596243	0.00781201	0.0106197	0.00694991	0.00406102	0.00583505
39	Chicken	CHIX (30)	N/A	Unmatured	0.0137069	0.0479094	0.122485	0.0121413	0.0226799	0.00172884	0.00846253	0.015721	0.0167733	0.0319571	0.0448332	0.0942809	0.0215543	0.0155897	0.0288872	0.0591915	0.0217037	0.0207155	0.0123153	0.00620893	0.014735	0.0156786	0.0221486	0.0257044	0.0283228	0.00794575	0.0205172	0.0307118	0.01209	0.00216197	0.00418032	0.00917038	0.00751469	0.00750142	0.0115203	0.0151029	0.0162723	0.0180173	0.0129212	0.00977565	0.00847825	0.0141338	0.0033248	0.0125055	0.00716883
40	Junco	JNCO (27)	N/A	Unmatured	0.00836561	0.0340145	0.0735605	0.0170185	0.0336871	0.0313343	0.00650145	0.00983502	0.0108524	0.0217429	0.0331716	0.061137	0.0525986	0.0213744	0.0298637	0.0360546	0.0506934	0.0241549	0.0280334	0.014066	0.0166256	0.0158614	0.0129787	0.0161689	0.0125319	0.031476	0.0158638	0.0277639	0.0304081	0.00479001	0.00495763	0.00778257	0.00875804	0.0107011	0.0159091	0.025176	0.0145227	0.0251025	0.0104715	0.00269968	0.00876571	0.0111053	0.00695316	0.00763456	0.00951482
41	Mallard	GRCA (29)	N/A	Unmatured	0.0121026	0.0476212	0.124787	0.0118386	0.0211475	0.0246662	0.00900889	0.0139138	0.0143427	0.0265601	0.035902	0.0815844	0.021368	0.0135115	0.0422629	0.0609112	0.0165682	0.0165597	0.0141666	0.0123514	0.0151362	0.0177042	0.0186666	0.0221196	0.0224935	0.00991942	0.0227363	0.0311561	0.0129579	0.00173202	0.00522904	0.00800771	0.00879523	0.0111723	0.0101493	0.0126698	0.0140623	0.0157069	0.0106979	0.00968723	0.00978439	0.0146644	0.00708224	0.01281	0.0089504
42	Dumetella carolinensis	D (26)	N/A	Unmatured	0.00861551	0.0512654	0.0685912	0.0309205	0.0459235	0.0442112	0.00878208	0.0177673	0.0160051	0.0233989	0.0187753	0.0544668	0.0442346	0.017802	0.0297443	0.0204661	0.0355817	0.0263599	0.0218343	0.00654755	0.0191987	0.0150616	0.0129616	0.0118113	0.0138189	0.0116191	0.0128278	0.0231698	0.0257111	0.00793269	0.00668374	0.00948275	0.0100887	0.0139629	0.0126271	0.0185839	0.0106845	0.0088769	0.0158288	0.0176875	0.00905134	0.0127247	0.0108629	0.0134879	0.0108498
43	Pigeon	PIGG (28)	N/A	Unmatured	0.00963226	0.0515447	0.0840371	0.0227772	0.0349808	0.0119502	0.00765596	0.0167696	0.0169763	0.0261336	0.0424754	0.0706714	0.034522	0.0234269	0.0348358	0.0440342	0.0309646	0.025229	0.023364	0.00628629	0.0179943	0.0162292	0.0156374	0.0192592	0.0194097	0.0073988	0.0163459	0.0252397	0.0220287	0.00394273	0.00622604	0.00979043	0.00835983	0.0103601	0.0132924	0.0191259	0.0135508	0.0215228	0.0116717	0.0101827	0.00819925	0.0113397	0.00708794	0.0120967	0.00939743
44	Turkey	B (32)	N/A	Unmatured	0.012584	0.051302	0.131272	0.0133282	0.0290558	0.00313967	0.00832222	0.0202754	0.015977	0.0276489	0.0382237	0.0922078	0.0137441	0.014025	0.036378	0.0638719	0.0162967	0.0234332	0.012178	0.00901274	0.0143752	0.0152606	0.0200174	0.0227114	0.0251401	0.00762802	0.0222276	0.0327507	0.0118001	0.000784669	0.00541396	0.0104394	0.00627463	0.00704473	0.010427	0.0133301	0.0145732	0.0146404	0.0106909	0.00771094	0.0103782	0.0147342	0.00627494	0.0124248	0.00729693
45	Pigeon	PIDGprox (37)	N/A	Unmatured	0.0140503	0.0487687	0.134033	0.0144014	0.0357825	0.00859199	0.00933295	0.0160367	0.0171739	0.0278727	0.0206939	0.0687467	0.0175953	0.0154498	0.0363443	0.0629136	0.0238612	0.02879	0.0157572	0.0122058	0.0162868	0.0157866	0.0101305	0.0218605	0.0248143	0.00944975	0.0181671	0.024337	0.0135845	0.00544183	0.00754719	0.00887289	0.00666005	0.00847877	0.0122481	0.0132907	0.00944187	0.0164989	0.0134161	0.0188049	0.0115057	0.0169984	0.00456042	0.00932292	0.00893954
46	Pigeon	PIDGdistal (38)	N/A	Unmatured	0.011886	0.0511951	0.108494	0.0158002	0.0199826	0.0291968	0.00237904	0.015045	0.0187412	0.0250655	0.0239826	0.0753447	0.0211177	0.0163812	0.042884	0.0554683	0.0283205	0.0264416	0.0169517	0.0154397	0.0181887	0.0213118	0.0116431	0.0211103	0.0251057	0.012905	0.0247783	0.0314599	0.0185885	0.0147549	0.00759886	0.00946454	0.00655982	0.00802768	0.0132741	0.0155086	0.0089947	0.0172119	0.0108863	0.00926946	0.0062855	0.000898439	0.00547146	0.00909056	0.0086704
47	Frog Liver	FROGliver (35)	N/A	Unmatured	0.0148424	0.047042	0.121977	0.0181786	0.0347217	0.0205644	0.00862774	0.0155914	0.0147923	0.0246317	0.0236135	0.0744613	0.0117886	0.0125495	0.0181699	0.0381701	0.0263291	0.0245369	0.015351	0.0133844	0.0156482	0.0186596	0.0196163	0.0158279	0.0270325	0.0132121	0.0246328	0.0333255	0.0142686	0.0114242	0.0111857	0.0177117	0.00939042	0.00787014	0.012326	0.0148024	0.010907	0.0158553	0.0116189	0.00890048	0.0110301	0.0144178	0.0047637	0.00804438	0.00933836
48	Frog Eye	FROGeye (33)	N/A	Unmatured	0.00956341	0.0402407	0.075341	0.00685938	0.0115789	0.0802819	0.00717432	0.0116564	0.0124367	0.0227285	0.0174229	0.063058	0.0867984	0.00759706	0.0293946	0.0250073	0.0267873	0.0132896	0.0134931	0.0121722	0.011958	0.0394612	0.0153333	0.011171	0.018373	0.00805297	0.0444682	0.0285037	0.0216934	0.0174073	0.00438068	0.00664496	0.00586619	0.00783648	0.0211553	0.0259187	0.0162697	0.0119611	0.00956911	0.00612401	0.00885128	0.0116874	0.00723584	0.00766081	0.0108114
49	Frog Eye	FROGeye (34)	N/A	Unmatured	0.00855772	0.0365875	0.0828003	0.0100257	0.0182159	0.0613932	0.00507536	0.0123465	0.0121843	0.0262374	0.0252473	0.0602907	0.0326393	0.00834181	0.026963	0.0269976	0.0188226	0.0158058	0.0153943	0.0143645	0.0138923	0.0227953	0.016737	0.0156331	0.0209193	0.0225233	0.0598034	0.0238808	0.0328865	0.0200462	0.00559705	0.00920545	0.0127179	0.0135828	0.0145987	0.0211719	0.0215984	0.0175925	0.0146614	0.00626215	0.00894657	0.0125731	0.00705491	0.0100553	0.00784662
50	Magpie Feather	MAGfeather (39)	N/A	Unmatured	0.0171064	0.0518293	0.118768	0.0148127	0.028863	0.0164727	0.0090658	0.0160753	0.0144893	0.0254698	0.0200185	0.0694522	0.0150601	0.0145582	0.0255148	0.0401125	0.0246693	0.0245905	0.0177279	0.0148253	0.0172014	0.0178309	0.0187753	0.0170184	0.0232109	0.0140259	0.0316075	0.0375061	0.0154094	0.0125945	0.00683058	0.0110747	0.00749239	0.00998445	0.0122697	0.0148456	0.0153338	0.0171229	0.0104411	0.00553749	0.0115052	0.0184096	0.005869	0.00863491	0.00829818
51	Eumelanin Standard	PUREMEL (36)	N/A	Unmatured	0.0181649	0.0547149	0.119975	0.00305567	0.00737538	0.0104978	0.0111499	0.0145125	0.0136781	0.0222098	0.0355321	0.0681056	0.0173874	0.0130211	0.037081	0.0499711	0.0066375	0.00836783	0.0272071	0.0122342	0.0187921	0.0134786	0.0133555	0.0144234	0.0178423	0.0109479	0.0323221	0.0271061	0.0132496	0.0140058	0.00468083	0.00592459	0.0132919	0.0192948	0.0136841	0.0196052	0.0125164	0.0135425	0.00954364	0.0232363	0.0145205	0.0126509	0.0109996	0.018699	0.010533
52	Wrinkled Hornbill - Black	AR8_220_	1031	SEM~190°C	0.0387515	0.0326548	0.127189	0.00298891	0.00431172	0.00332965	0.0135096	0.0246544	0.0155469	0.129007	0.0305491	0.07368	0.00380649	0.0164122	0.0178909	0.0659537	0.00753513	0.00925577	0.011004	0.00542957	0.0147124	0.0105245	0.0204909	0.0173899	0.0310929	0.0316507	0.0216307	0.0288311	0.00661185	0.00801716	0.00343717	0.00593607	0.00411447	0.007086	0.00762091	0.00761147	0.00661369	0.0111332	0.0107054	0.0139191	0.00913526	0.0136332	0.00423271	0.0116946	0.00532292
53	Common Pheasant -Reddish Brown	AR8_511_	1041	SEM~190°C	0.0563474	0.0463072	0.106738	0.00538987	0.00753699	0.00640069	0.0229396	0.0280439	0.0167033	0.182855	0.0308618	0.0634929	0.00648684	0.0186672	0.0195649	0.0476893	0.012136	0.014335	0.0102253	0.00530361	0.00975135	0.00988102	0.01378	0.0127017	0.0209099	0.0438435	0.0249127	0.0158877	0.0053014	0.00881755	0.00495392	0.00634769	0.0047957	0.00475553	0.00484712	0.00380295	0.00406938	0.00501606	0.00880172	0.00794992	0.010252	0.00746468	0.00311205	0.00462646	0.00411798
54	Pigeon - Grey	AR8_720_	1035	SEM~190°C	0.110186	0.062556	0.0805542	0.00650572	0.00831498	0.00721429	0.0181077	0.0257128	0.0127497	0.228772	0.0197854	0.0375152	0.0040529	0.0287226	0.0263363	0.0360719	0.0150784	0.0132001	0.00972008	0.00491999	0.00618373	0.00489523	0.00682398	0.00680434	0.00993479	0.0774226	0.0208453	0.0123071	0.00414383	0.00464339	0.00464743	0.00495299	0.00329333	0.00430895	0.0043172	0.00248434	0.00243474	0.00172502	0.00291359	0.00516779	0.0129357	0.00630817	0.00286408	0.00420976	0.00420976
55	Wrinkled Hornbill - Black	AR8_611_	1037	SEM~190°C	0.035817	0.0335572	0.136951	0.00219807	0.00380774	0.00363126	0.014365	0.0253197	0.0216471	0.0997401	0.028603	0.0772164	0.00242883	0.017634	0.0203889	0.0728357	0.00660268	0.00688073	0.0137458	0.00633334	0.0169437	0.0106294	0.0215799	0.017261	0.0309289	0.0260242	0.0195325	0.0329098	0.00711848	0.00742028	0.00303052	0.00412314	0.00390266	0.00789203	0.00854834	0.00874839	0.0072925	0.0117849	0.00979548	0.0146476	0.00817028	0.0154161	0.005301	0.0131251	0.00517641
56	Pigeon - Grey	AR5_110_	1042	SEM~190°C	0.0480297	0.0510348	0.100352	0.00646021	0.00696544	0.0102115	0.0214253	0.0210017	0.0238543	0.163538	0.027681	0.0650637	0.00780185	0.0195771	0.026062	0.0482611	0.00905567	0.0104082	0.0111208	0.00683672	0.0108383	0.00933569	0.0131708	0.0131675	0.0214044	0.0366866	0.0252583	0.0197565	0.00589227	0.00720729	0.00463484	0.00445501	0.00462192	0.00695682	0.00851994	0.00574739	0.00473914	0.00583839	0.0068642	0.00995371	0.00891444	0.00944088	0.00445476	0.00963798	0.00963721
57	White-rumped mannikin -Black	AR4_510_	1077	SEM ~200°C	0.00942053	0.0187391	0.107811	0.00115024	0.00184058	0.00196927	0.00855258	0.0144049	0.0185203	0.039907	0.0161763	0.260302	0.00701282	0.00467164	0.00842304	0.0251388	0.00394447	0.00278153	0.00609962	0.00304456	0.00732664	0.00533049	0.025758	0.0290926	0.0631151	0.0187484	0.00882682	0.00857475	0.00329098	0.00458143	0.00368327	0.00630602	0.00449944	0.00393396	0.0069477	0.0046624	0.00409189	0.130641	0.0154696	0.0109045	0.00439237	0.00410619	0.00506746	0.00739099	0.0073895
58	Shrenck's Bittern - Reddish Brown	AR4_610_	1078	SEM ~200°C	0.0537843	0.0654269	0.137958	0.00686875	0.0120902	0.0179742	0.0397668	0.0291552	0.0344855	0.0732713	0.0211203	0.05842	0.00492118	0.0269363	0.0319695	0.0636782	0.00812285	0.011413	0.0167722	0.00810277	0.0119753	0.00813025	0.0108193	0.010783	0.0182904	0.0186259	0.0160038	0.0220692	0.00477819	0.0120432	0.00518801	0.00449576	0.00659553	0.00845709	0.00916081	0.00570613	0.00405901	0.00503426	0.00476243	0.0115696	0.0110958	0.010148	0.00436012	0.00803871	0.00803871
59	Shrenck's Bittern - Grey	AR4_710_	1079	SEM ~200°C	0.0551341	0.0711471	0.0825685	0.0109739	0.00871537	0.0401147	0.087734	0.0374357	0.0474201	0.0913404	0.0235824	0.0479562	0.0117428	0.0222117	0.0281621	0.0313589	0.00970062	0.00626406	0.0119275	0.00815642	0.00805917	0.0136302	0.0106066	0.0115115	0.0125841	0.0206918	0.0122169	0.010972	0.00603712	0.0285359	0.00465421	0.00443798	0.00330651	0.00539978	0.0056054	0.00357819	0.00311843	0.00414904	0.00418376	0.00615923	0.0144653	0.00603701	0.00406537	0.00451473	0.00451125
60	Pigeon-iridescent	AR4_810_	1080	SEM ~200°C	0.0487521	0.0517374	0.0971989	0.00771684	0.00747907	0.0339151	0.0559127	0.0326089	0.0346133	0.101113	0.0206123	0.0674749	0.00760485	0.0200517	0.0247259	0.041476	0.00812973	0.00632292	0.0125737	0.00735952	0.0105691	0.00989566	0.0119491	0.0130924	0.0171671	0.0268179	0.0144033	0.0185495	0.00584634	0.0195617	0.00424958	0.00527176	0.00345137	0.00709334	0.00801823	0.00567142	0.00426365	0.00953149	0.00600025	0.0093073	0.0155371	0.010302	0.00507585	0.00916675	0.00915975
61	Common Pheasant -Reddish Brown	AR8_321_	1026	SEM ~225°C	0.0587236	0.0423001	0.0962216	0.0035874	0.00436099	0.00911175	0.0288115	0.0249493	0.0315669	0.173933	0.0229759	0.0553702	0.0030928	0.0171665	0.0214434	0.0442977	0.00976563	0.0101056	0.00941238	0.0053008	0.00990114	0.00779576	0.013877	0.0115195	0.0176932	0.0600126	0.0255312	0.0198327	0.00485124	0.00820132	0.00319583	0.0042028	0.00321593	0.00541408	0.00718693	0.00489136	0.00499685	0.0053617	0.00546681	0.00905757	0.00927451	0.0095638	0.0040094	0.0100927	0.00395173
62	Turkey - iridescent	AR8_411_	1028	SEM ~225°C	0.0561794	0.0386295	0.0923814	0.00391105	0.00455251	0.00806961	0.0382926	0.028846	0.0250991	0.161343	0.0269375	0.057648	0.00439886	0.0121146	0.0191902	0.0472708	0.01069	0.011156	0.00966252	0.00530558	0.0123804	0.0106862	0.0167363	0.0138757	0.0219913	0.0471798	0.0262368	0.0198897	0.00562466	0.0136832	0.0026017	0.00540558	0.00256718	0.0046563	0.00586285	0.00411468	0.00408779	0.00831995	0.00835432	0.00926623	0.0107247	0.00970874	0.00269	0.00828892	0.00477156
63	Wrinkled Hornbill - Black	AR8_711_	1030	SEM ~225°C	0.113847	0.0656423	0.0866595	0.00617898	0.00760914	0.00526505	0.0124351	0.0221917	0.00991781	0.235339	0.0198468	0.0400575	0.00393742	0.0305978	0.0274284	0.0382233	0.0137672	0.0131397	0.0107167	0.00510649	0.00667817	0.00541929	0.0063923	0.00676136	0.0106647	0.0739795	0.0206536	0.0124985	0.00407894	0.003186	0.00437672	0.00466727	0.00311107	0.00428743	0.00422783	0.00241879	0.00255272	0.00170427	0.00277602	0.00562049	0.0113133	0.00580732	0.00251552	0.00409382	0.00282066
64	Pigeon - Grey	AR8_820_	1045	SEM ~225°C	0.0387513	0.0326549	0.127189	0.0029887	0.00431193	0.00332968	0.0135099	0.0246544	0.0155471	0.129007	0.0305492	0.0736802	0.00380632	0.0164122	0.0178909	0.0659535	0.00753494	0.00925589	0.011004	0.00542984	0.0147122	0.0105243	0.0204911	0.0173902	0.031093	0.0316504	0.0216306	0.0288313	0.00661188	0.00801713	0.00343697	0.00593608	0.00411462	0.00708605	0.00762065	0.0076114	0.00661373	0.0111335	0.0107055	0.0139193	0.00913504	0.0136332	0.00423301	0.0116946	0.00532317
65	Common Pheasant -Reddish Brown	AR9_111_	1065	SEM ~250°C	0.0855245	0.0643419	0.0176937	0.00959705	0.0064814	0.0260473	0.0699582	0.0493606	0.043667	0.232498	0.0180999	0.0167745	0.00467367	0.0202062	0.0246411	0.00872725	0.0158452	0.00975755	0.0062148	0.00521753	0.00345289	0.00379407	0.00921188	0.00746865	0.00409796	0.0725953	0.0167696	0.00597488	0.00525492	0.0253118	0.00463643	0.00617745	0.00174754	0.00245093	0.00200327	0.00127863	0.00127325	0.00093761	0.00166758	0.0013532	0.0220151	0.0051698	0.00279733	0.00206187	0.00334103
66	Wrinkled Hornbill - Black	AR9_211_	1058	SEM ~250°C	0.0616651	0.0599138	0.0792689	0.004656	0.00420568	0.0120252	0.0384212	0.0252123	0.0670333	0.173621	0.0209693	0.0433733	0.00313164	0.0216784	0.0302005	0.0336833	0.00918605	0.00861381	0.0103041	0.00624865	0.00798271	0.00566035	0.0103094	0.00919285	0.0129642	0.0523325	0.0224196	0.0136957	0.00397527	0.00921685	0.00376474	0.0038646	0.00280082	0.00567747	0.00718904	0.00385038	0.0050161	0.00275755	0.00354734	0.00810709	0.00983537	0.00662409	0.00377483	0.00751746	0.00323437
67	Pigeon - Grey	AR9_321_	1061	SEM ~250°C	0.08043	0.05334	0.0313445	0.00694988	0.00517239	0.0164037	0.0563929	0.0288818	0.0707517	0.237825	0.0165857	0.0248701	0.00388585	0.0191351	0.0232002	0.0130693	0.0126438	0.0107127	0.00574858	0.00395241	0.00357277	0.00354137	0.00791704	0.00664808	0.00619138	0.0801724	0.0228813	0.00799931	0.00366465	0.0167927	0.00337309	0.00372546	0.00193514	0.00305408	0.00318323	0.00184324	0.00188818	0.00127618	0.0020642	0.00299928	0.0116345	0.00481437	0.0023869	0.00290728	0.00269211
68	Turkey - iridescent	AR9_410_	1056	SEM ~250°C	0.0685479	0.0486176	0.0474491	0.00634532	0.0051581	0.0157518	0.0675805	0.0361393	0.0483995	0.209284	0.0192063	0.0308181	0.00584613	0.015759	0.0197482	0.0218338	0.0123303	0.0118395	0.00684495	0.00463555	0.00579894	0.00708421	0.00956576	0.00805627	0.00962629	0.0635806	0.0306967	0.0102749	0.00477719	0.0237034	0.00381304	0.00513124	0.00260324	0.0034726	0.00293342	0.00232698	0.00223263	0.00272452	0.00384334	0.00371869	0.0151573	0.00600875	0.00245832	0.00369499	0.00355015
69	Turkey - iridescent	AR9_510_	1057	SEM ~250°C	0.0784149	0.0485734	0.047877	0.00616367	0.00533275	0.0188126	0.0715362	0.0354783	0.0476352	0.195411	0.0172737	0.0298026	0.00472355	0.0193466	0.0227846	0.0228999	0.0115862	0.0102263	0.0074503	0.00485413	0.00590261	0.00560182	0.00900232	0.00734712	0.00873681	0.0664772	0.0216997	0.010991	0.00434391	0.021214	0.00336716	0.00428458	0.00237481	0.0039642	0.00449425	0.00301917	0.0032406	0.00229182	0.00288874	0.00474337	0.0131754	0.00622742	0.00314569	0.00498468	0.00360831
70	Common Pheasant -Reddish Brown	AR9_611_	1064	SEM ~250°C	0.0664448	0.0502821	0.0136246	0.00750683	0.00576512	0.0348073	0.12964	0.0501423	0.0618456	0.181856	0.014551	0.0132957	0.0036274	0.0148188	0.0194845	0.00680395	0.013916	0.00792348	0.00544836	0.00445563	0.00272692	0.00310846	0.00923793	0.00632653	0.00284137	0.0536195	0.0123549	0.00467708	0.00426101	0.044858	0.00337559	0.00520776	0.00118586	0.00186095	0.00180373	0.00130408	0.00114008	0.00105621	0.00160156	0.00129646	0.0189718	0.00400924	0.00262773	0.00204402	0.00280706
71	Wrinkled Hornbill - Black	AR9_720_	1059	SEM ~250°C	0.0691661	0.0611403	0.0622191	0.00596799	0.00515944	0.0163858	0.0330304	0.0300414	0.0639749	0.209801	0.021169	0.036279	0.00398019	0.0211597	0.0282521	0.0263114	0.0120775	0.0101446	0.00834623	0.00555074	0.00660623	0.00584473	0.0115147	0.00921327	0.0108353	0.063821	0.0247344	0.0117385	0.00487897	0.00744845	0.0043553	0.00544668	0.0027168	0.00450548	0.00516754	0.00315368	0.00356383	0.00216246	0.00309295	0.0059022	0.0134232	0.00578609	0.00372431	0.00587533	0.00363416
72	Pigeon - Grey	AR9_820_	1060	SEM ~250°C	0.0731017	0.0506784	0.0262839	0.006956	0.00523171	0.017924	0.0548648	0.0274583	0.0727048	0.259266	0.0161581	0.0239753	0.00425851	0.0182569	0.0217178	0.0113113	0.0126854	0.0113873	0.00504686	0.00371924	0.00316886	0.00363141	0.00790829	0.00654368	0.0056044	0.0782898	0.0214301	0.00739169	0.00370371	0.0177813	0.00339695	0.00401481	0.00186869	0.00290137	0.00283224	0.00181398	0.00167893	0.00121721	0.00192743	0.00247825	0.0118713	0.00453784	0.0022626	0.00246585	0.00262376
73	Wrinkled Hornbill - Black	AR5_510_	1053	SEM ~300°C	0.0507982	0.0525464	0.0190351	0.00939513	0.00858481	0.0523602	0.109887	0.0319627	0.0911297	0.169222	0.0168286	0.0348605	0.0120401	0.0128121	0.0184979	0.00606198	0.00926249	0.00677717	0.00477095	0.00588169	0.00401215	0.00765533	0.0126983	0.0104504	0.00690886	0.035306	0.0120957	0.00369278	0.00627711	0.0230524	0.00423187	0.00637292	0.00209951	0.00187987	0.00155261	0.00115742	0.0014528	0.00775661	0.00313343	0.0015206	0.0175069	0.00436739	0.0040321	0.00261437	0.00260639
74	Common Pheasant -Reddish Brown	AR8_120_	1047	SEM ~300°C	0.044005	0.0351826	0.116271	0.00319001	0.00432636	0.00299591	0.0134314	0.0247341	0.0165133	0.165093	0.0310001	0.0721021	0.00511167	0.0159368	0.0174759	0.0584519	0.00856054	0.011489	0.0107969	0.00529902	0.0135747	0.0113871	0.0183876	0.0156354	0.0272686	0.0401737	0.0252036	0.0243622	0.00620369	0.00693543	0.00336539	0.00529018	0.00337014	0.00559437	0.00605047	0.00606521	0.00553392	0.0091018	0.00998625	0.0109424	0.00891665	0.0108999	0.00322931	0.00850133	0.00471067
75	White-rumped mannikin -Black	AR4_110_	1073	SEM ~300°C	0.0673664	0.0388593	0.0250485	0.00812892	0.00639951	0.0348725	0.0643055	0.0275194	0.0479337	0.254493	0.0141463	0.049536	0.00816549	0.0145569	0.0171516	0.00597018	0.0103347	0.0111862	0.00376931	0.00376274	0.00321606	0.00561914	0.00956439	0.0118834	0.00726391	0.0824756	0.020859	0.00650737	0.00433234	0.0204678	0.00344512	0.00486253	0.00194964	0.00189394	0.00174674	0.00109898	0.00153407	0.00744424	0.00227674	0.00172712	0.0116551	0.00346137	0.00253193	0.0015929	0.0015929
76	Shrenck's Bittern - Reddish Brown	AR4_210_	1074	SEM ~300°C	0.0139582	0.0187166	0.122217	0.00156869	0.00310328	0.00832318	0.0264199	0.0207466	0.0232118	0.058729	0.0147664	0.267296	0.00610434	0.00400257	0.00530207	0.0212635	0.0108272	0.00501757	0.00440279	0.00272874	0.00823808	0.00507425	0.0292624	0.0308688	0.0622745	0.0207689	0.00796364	0.00551784	0.00339818	0.00895823	0.00325897	0.00606905	0.00352044	0.00202713	0.00301254	0.00297517	0.00266361	0.0756196	0.0105782	0.00798001	0.00499763	0.00237558	0.0036244	0.00438651	0.00438169
77	Shrenck's Bittern - Grey	AR4_310_	1075	SEM ~300°C	0.0434935	0.0369624	0.0561284	0.00823231	0.00746269	0.0555335	0.108631	0.0506728	0.0328476	0.0707095	0.016132	0.100063	0.00933689	0.0121822	0.0147259	0.0118475	0.00967151	0.00655888	0.00943728	0.00813193	0.00957113	0.0117803	0.0160316	0.0177389	0.0196137	0.0219574	0.00759654	0.00491924	0.00675965	0.0356357	0.0052204	0.00843309	0.00317889	0.00441731	0.00331274	0.00317889	0.00398197	0.0243014	0.00585618	0.00525386	0.0176381	0.00659234	0.00655922	0.0044839	0.0044839
78	Pigeon-iridescent	AR4_410_	1076	SEM ~300°C	0.0929628	0.0222154	0.0161719	0.0156803	0.0143736	0.0233587	0.0599591	0.0302205	0.0213987	0.0375706	0.0102902	0.0186203	0.0163336	0.0148636	0.0153536	0.0114335	0.0210704	0.0130669	0.0143736	0.0124136	0.0142103	0.019927	0.0143736	0.0137202	0.0129036	0.0217254	0.0158436	0.0133936	0.0138836	0.0173136	0.0155169	0.0182937	0.0106169	0.0130669	0.0132302	0.0129036	0.0151903	0.0135569	0.0158436	0.0142103	0.0147003	0.0148636	0.0147003	0.0145369	0.0145369
79	Wrinkled Hornbill - Black	AR5_410_	1052	SEM ~300°C	0.0578656	0.0575595	0.013564	0.0108048	0.0112497	0.0465221	0.0806025	0.0250243	0.0960784	0.21304	0.0181707	0.0235532	0.0156435	0.0148328	0.0206357	0.00574791	0.0107922	0.00834672	0.00441752	0.00576315	0.00367936	0.00626649	0.0136426	0.0100769	0.00568807	0.042037	0.0164743	0.00434587	0.00637314	0.0128973	0.00473679	0.00699927	0.00224418	0.00183767	0.00190019	0.000900007	0.00161576	0.00337925	0.0032413	0.00146256	0.0156616	0.00427947	0.00415477	0.00252848	0.00252848
	AVERAGE				0.0347985	0.073291	0.109104	0.011497	0.0233997	0.0166396	0.0195065	0.0278305	0.0212112	0.0575759	0.0273864	0.0556964	0.0144902	0.0181334	0.0428705	0.0452796	0.0193249	0.0163879	0.0134444	0.0101744	0.013468	0.0136909	0.0144755	0.016243	0.0168397	0.0213327	0.0296793	0.0244367	0.0103692	0.00646633	0.00574573	0.00780549	0.0068174	0.00768863	0.009287	0.00982541	0.00893513	0.0122832	0.00787948	0.00729335	0.0141556	0.0110844	0.0052309	0.00724099	0.00652151
[truncated: 10 more columns]

## Sheet: PCA Mean Centred
Theoretical m/Z					48.001	49.008	50.004	56.98	57.976	59.014	61.008	62.004	63.011	64.019	65.015	65.999	71.025	72.001	73.008	74.004	80.98	81.976	84.001	85.008	86.009	87.011	88.019	89.003	89.999	96.001	97.008	98.004	99.011	100.004	104.98	105.976	108.001	109.008	110.004	111.011	112.019	113.003	113.999	117.976	121.008	122.004	133.008	134.0036/133.9706	135.011
No.	Taxonomy	Abbr.	Stub No.	Category	C4	C4H	C3N	C2HS	CNS	C2H3O2	C5H	C4N	C4HN	C4H2N	C4HO	C3NO	C3H3O2	C6	C6H	C5N	C4HS	C3SN	C7	C7H	C6N	C6HN	C6H2N	C6HO	C5NO	C8	C8H	C7N	C7HN?	C3S2?	C6HS	C5SN	C9	C9H	C8N	C8HN	C8H2N	C8HO	C7NO	C6NS	C10H	C9N	C11H	C10N/C6NSO	C10HN
1	Chicken	ChickPHEO200 (40)	N/A	200°C	0.0276147	0.0199435	0.00731464	-0.0207121	-0.143512	0.00841817	0.0125655	0.0137777	0.0037245	0.0419104	0.0040125	0.0114165	0.00919275	0.00705137	0.00574335	0.00312739	-0.0293019	-0.0428955	0.00603328	0.00437628	0.0039815	0.000588917	-0.00514848	-0.00566522	0.00489481	0.0177112	0.0158083	0.00305927	0.00147218	0.00394963	-0.00658914	-0.0100535	0.000702274	0.0015979	0.000857175	-0.000321931	0.00295642	-0.0010009	-0.00197481	0.00375346	0.0105257	0.00525718	0.000875388	0.00278686	0.00148673
2	Crow	CrowEU200 (46)	N/A	200°C	0.00937987	-0.00364396	-0.0297738	-0.00309475	-0.00174434	0.00204606	0.00625734	0.00586642	0.00326629	0.0330055	0.0109973	0.00424414	0.00460961	-0.006801	0.00397976	0.0190729	0.00273903	-0.0035996	-0.0016751	-0.00272336	-0.00457408	-0.00363875	-0.0101857	0.000103739	-0.00379191	0.00934449	0.00156216	-0.0163157	-0.000232139	0.00545154	-0.000549245	-0.00120153	-0.00259122	-0.00175227	-0.00314194	-0.00355981	-0.00107822	-0.00226203	-0.0035754	0.00426085	0.000566483	-0.00895691	-0.001002	6.5586e-05	-0.0028469
3	Chicken	CHIX200 (45)	N/A	200°C	0.0205725	0.011174	-0.0538355	0.00129031	-0.0363543	0.00937638	0.0110872	0.0102542	0.00549936	0.0300232	-0.012813	0.00124554	0.0097688	0.00303182	0.0036238	-0.0286504	0.00328905	-0.00592642	0.00428746	0.00144821	-0.000176611	-0.000228813	-0.00805189	-0.00936195	-0.00547727	0.013993	0.00996635	-0.00826003	0.00211625	0.00619246	0.00141635	-0.000167086	0.000689218	0.00227173	0.000359862	0.00031136	-0.00563791	-0.000800732	-0.00276935	0.00303199	0.00512491	-0.00334209	0.000563041	0.00538032	-0.000116128
4	Junco	JNCO200 (42)	N/A	200°C	0.0252125	0.0176903	-0.0222489	-0.00986171	-0.0690021	0.00783984	0.013824	0.0156344	0.00796515	0.0342603	-0.00826795	0.00585669	0.00832379	0.00677278	0.0068796	-0.0109421	-0.0490984	-0.0142989	0.0050143	0.00340737	0.00293788	0.00171386	-0.00439723	-0.00600524	-0.000634256	0.0162133	0.0105624	-0.00185672	0.00331792	0.00559084	-0.00130061	-0.00336328	0.000345872	-0.000603046	0.00102221	-0.000397752	-0.00462116	0.000569734	-0.00132328	0.00312486	0.0049432	-0.00062821	-0.000631301	0.00486302	-0.00127901
5	Mallard	GRCA200 (44)	N/A	200°C	0.0159571	-0.0135347	-0.0307629	-0.0125514	-0.0399113	0.0116697	0.00711766	0.00519662	0.00255046	0.0303327	-0.0124847	0.00699724	-0.0119664	0.00457433	-0.00704067	-0.00972073	-0.00856726	-0.0101398	0.00390876	0.000493158	-0.000104495	-0.00320004	-0.00316911	-0.00266205	0.00428595	0.015949	0.00892142	0.0025139	0.000478024	0.00107317	-0.0028338	-0.0036139	0.00123856	0.00243262	0.00242165	0.00148297	-0.000577471	0.00251463	0.00435429	0.00455759	0.00549188	0.00187946	0.00161584	0.00642277	0.00151552
6	Dumetella carolinensis	D200 (41)	N/A	200°C	0.0185101	0.00299401	-0.0520534	-0.00895665	-0.0396366	0.00957594	0.0111817	0.0205178	0.0058617	0.0495932	-0.00598059	0.00624741	0.00805167	0.004732	-0.000418936	-0.02619	-0.00960852	-0.0120632	0.00316389	0.00168099	-0.000446785	-0.000383505	-0.0054322	-0.0058305	-0.000378348	0.0138248	0.00850035	-0.00841988	0.00247775	0.00593894	-0.00137376	-0.00422015	-0.000273029	0.00194645	0.000504066	0.000246992	-0.00429397	0.000328316	-0.000961908	0.00217594	0.00391294	-0.00327195	-0.000234154	0.00520904	0.000297023
7	Pigeon	PIGG200 (43)	N/A	200°C	0.0161447	-0.00662373	-0.0478318	-0.00688508	-0.0127128	0.0052168	0.00943878	0.0103437	0.00318865	0.0337395	-0.00687062	0.00413394	0.00894751	0.00355587	-0.00615061	-0.0264971	-0.00198878	-0.0048309	0.00170329	0.00148003	-0.000617946	-0.00011741	-0.0045255	-0.00535149	-0.000433975	0.0143154	0.00834824	-0.00771425	0.00275463	0.00587776	-8.45314e-05	-0.00106453	0.00028466	0.00108339	0.000604374	0.000603299	-0.00367309	0.00121231	-0.000142947	0.00356333	0.00385919	-0.00280022	0.00149419	0.00120317	-0.00029417
8	Turkey Feather	B200 (47)	N/A	200°C	0.017271	0.00752945	-0.0522093	-0.00349281	-0.00280053	0.00330299	0.0106311	0.00444282	0.00623302	0.0353481	-0.00570808	0.000687008	0.00924419	0.00184127	-0.00225535	-0.0325988	0.00606428	-0.00248933	0.00305518	0.00165488	-0.00126843	-0.000228185	-0.00581951	-0.00579032	-0.00195313	0.0136222	0.00615894	-0.0126823	0.00186913	0.00534224	0.000754224	-0.00181913	0.000499687	0.000757876	-0.000198411	-0.0016194	-0.00562262	1.34761e-05	-0.000963086	0.00407488	0.00241289	-0.00559453	6.97943e-05	0.000926347	-0.00053286
9	Chicken	ChickPHEO250 (48)	N/A	250°C	0.0240701	-0.0206803	0.00132129	-0.0272002	-0.0581529	0.00816392	0.00715339	0.0238489	-0.00454581	0.0280829	0.0156247	0.0187255	0.00430872	0.00765597	-0.0169807	0.00275096	-0.0316144	-0.022566	0.0047523	0.000910289	0.00122705	-0.00249562	-0.00563171	-0.00254185	0.00551315	0.0165437	0.0120017	0.00882158	0.00412782	-0.00348189	-0.00569703	-0.00583021	0.00111621	0.00237807	0.0023012	0.00156126	-0.00108282	0.00271373	0.00440409	0.00257672	0.00502864	0.00434601	0.00101735	0.00136855	-0.00385219
10	Crow	CrowEU250 (54)	N/A	250°C	0.00945427	-0.00636662	-0.099151	0.00584923	-0.00154021	0.00294883	0.00860817	0.00753572	0.00555964	0.0345282	0.0118159	0.0218357	0.00633898	-0.0171919	0.0186468	0.0144919	0.00148632	0.00186966	-0.00180284	-0.00487146	-0.00340106	-0.00217257	-0.00785402	0.00802304	0.00334199	0.0111407	-0.00673118	-0.021356	0.000428835	0.00589089	0.00106538	-0.000738765	0.000510481	0.00128233	-0.00148129	-0.00148652	-0.0005451	-0.000486796	-0.000748944	0.00561706	-0.000440903	-0.00834223	0.00118136	0.00115972	-0.00199205
11	House Wren	HOWR250 (49)	N/A	250°C	0.0132419	-0.041204	-0.0407003	-0.016452	-0.0289826	0.00693281	0.00859524	0.00945508	0.00349073	0.0371093	0.00095765	0.0335009	0.00906373	0.00525271	-0.017606	-0.0159238	-0.00857142	-0.0115067	0.0037365	0.00138604	5.90419e-05	0.000411344	-0.00212965	-0.00132337	0.00626542	0.0146406	0.00151157	-0.00239281	0.00348137	0.00574288	-0.00361834	-0.00394976	0.000445644	0.000451582	0.0014845	0.00152757	-0.00190286	0.00317832	0.0015614	0.00408945	0.00172326	-0.000248713	0.000139349	0.00587804	0.000423248
12	Chicken	CHIX250 (53)	N/A	250°C	0.0161895	-0.000909315	-0.0791682	0.00437262	-0.00889872	0.010655	0.0104201	0.0195831	0.00438961	0.0293669	-0.0108431	0.0176057	0.00725085	0.00305534	-0.00230269	-0.0340529	0.0015818	-0.0050027	0.00434932	0.000236286	-0.000232769	-0.000211173	-0.00818599	-0.00830749	-0.00188754	0.0145465	0.00737527	-0.0113363	0.00333578	0.00630479	0.00190865	0.00046213	0.001042	0.00245158	0.000808417	-2.12666e-05	-0.00636518	-0.000869146	-0.00202103	0.00515383	0.00403855	-0.00422034	0.00234595	0.00117117	-0.000223558
13	Junco	JNCO250 (51)	N/A	250°C	0.019058	0.00888326	-0.0616397	-0.00152819	-0.0209272	0.00916449	0.0136362	0.0123354	0.00848247	0.0366531	-0.000460229	0.0267886	0.0112718	0.00749961	0.00419611	-0.0216104	-0.0263643	-0.0101277	0.00440309	0.00408193	0.00236878	0.00226369	-0.0036458	-0.00251584	0.00388264	0.0149478	-0.0673576	-0.00718149	0.00477973	0.00614889	0.00027735	-0.0011713	0.00114528	0.00217662	0.0017585	0.0013648	-0.0036914	0.00120699	0.000792126	0.00505643	0.00394525	-0.00230557	0.00135088	0.00240427	0.000267472
14	Dumetella carolinensis	D250 (50)	N/A	250°C	0.0173933	-0.0169357	-0.0625061	-0.00525122	-0.0147519	0.00847207	0.00991973	0.00761705	0.0039763	0.0322141	-0.00880147	0.023032	0.00780632	0.00498455	-0.00541956	-0.0265216	-0.00452586	-0.00763083	0.00457117	0.00155537	0.00040678	-0.000146305	-0.00549898	-0.00519215	0.00357626	0.0151112	0.00753513	-0.00677305	0.00303581	0.00563927	-0.000177551	-0.00181283	0.00111592	0.00229387	0.00114921	2.51428e-05	-0.00395743	0.000944077	3.36084e-05	0.00344052	0.00371571	-0.00250867	0.0021011	0.00214681	-0.000144794
15	Pigeon	PIGG250 (52)	N/A	250°C	0.0111389	-0.0493415	-0.031322	-0.00966978	-0.00968756	0.00143138	0.00467262	0.00298521	-0.00314865	0.0417613	-0.008892	0.0231875	-0.00293285	0.00488772	-0.0147464	-0.0114302	-0.00682662	-0.00514586	0.00429792	0.00017684	0.000686377	-0.00222176	-0.00200426	-0.00699663	0.00493968	0.0160153	0.00875444	0.000717699	0.00133174	0.00451616	-0.000394054	-0.000760005	0.00132044	0.00204573	0.00206708	0.0012625	-0.00102329	0.00370447	0.0036913	0.00465489	0.00419194	0.00149432	0.00149761	0.00249421	-0.000118508
16	Turkey	B250 (55)	N/A	250°C	0.0164821	0.00405624	-0.0666802	0.00678689	0.00427672	0.00805657	0.00993424	-0.0113419	0.00670008	0.0349348	-0.00417393	0.0158758	0.00483961	-0.00802928	-0.00812731	-0.0345147	0.00539896	-0.00184212	0.00297898	2.87601e-06	-0.0012963	-0.00249718	-0.00534121	-0.00586374	0.00155977	0.0110449	0.00286536	-0.0129531	0.00111145	0.0043014	0.0021999	0.00134341	0.00108941	0.00158451	-7.48152e-05	-0.00121544	-0.00491388	0.0108732	2.66998e-05	0.00549182	0.0018046	-0.00549316	0.00161968	0.00602849	-0.000456494
17	Pipidae	BigFROG (9)	N/A	Fossil	-0.00352116	-0.0318068	-0.0087268	0.00688843	0.019357	0.0083643	0.00409039	0.00889373	0.0077394	0.0439997	-0.0125824	0.0056913	0.00595778	-0.00746846	-0.0300246	-0.0130644	0.00922442	0.0107253	-0.00356337	-0.00458499	-0.00471129	-0.00105425	0.00190309	-0.000795725	0.00262033	0.0070618	-0.0169298	-0.00541439	0.00239948	0.00552351	0.00236368	-0.00299657	-0.00366107	-0.00350993	-0.00243079	-0.000865758	-0.000377695	0.00314802	0.00171393	0.0009652	-0.00620188	-0.00284493	-0.000335028	0.000712863	0.00100251
18	Pipidae	SmallFROG (10)	N/A	Fossil	-0.0318758	-0.0694118	0.00947292	0.00629249	0.017633	0.0127664	-0.00233681	0.00607222	0.00889283	0.0481938	-0.000805678	0.0180186	0.01179	-0.0164294	-0.0398945	0.00055996	0.0124025	0.0118861	-0.00617534	-0.00530964	-0.00391389	0.00360751	0.00643815	0.00331604	0.00680641	0.00374118	-0.0165278	0.00168233	0.00425802	0.00551531	-0.00107969	0.000866274	-0.00456218	-0.00497441	-0.00138832	0.00276913	0.00335345	0.00405632	-0.00169704	0.000543261	-0.00771149	-0.000366781	-0.00292398	-0.00206558	0.00121738
19	Fur Feather	FurBIRD (6)	N/A	Fossil	-0.0169861	-0.0573363	0.0137788	-0.00213888	0.00874951	0.0100936	0.000981586	0.00620424	0.00991528	0.0487362	-0.00640733	0.0174238	0.00926893	-0.0107895	-0.0344963	-0.00182208	0.00658193	0.00393287	-0.00508726	-0.0134487	-0.00177171	0.00173723	0.00526785	0.000115367	0.00260811	0.00457648	-0.0105601	0.00216549	0.00764324	0.003877	-0.00342227	0.000458668	-0.00804144	-0.00618879	0.000120782	0.0019132	0.0027912	0.00437033	-0.000616781	0.000931984	-0.00593073	0.00142397	0.000632584	0.00219665	0.00320021
20	Messel Feather	MESSEL (4)	N/A	Fossil	0.00104006	-0.0349104	-0.00204167	0.00550201	0.0171159	-0.00303925	0.00757282	0.00862588	0.00193339	0.0417339	-0.00802415	-0.00892187	0.00206689	-0.00256519	-0.0238829	-0.00254283	0.0025611	0.00660196	-0.000505341	-0.00403287	-0.00283701	-0.000534059	0.00216185	-0.000882835	0.00373421	0.0110207	-0.00434188	0.000427251	0.0018755	0.00188092	-0.004872	-0.0044156	-4.74449e-05	-3.35849e-05	-0.000895138	0.000568086	0.000676245	0.00527034	0.00209505	-0.0025852	-0.00204978	-0.000396526	4.63996e-05	-0.0045385	-0.00281835
21	Hassianicterys	HANS (12)	N/A	Fossil	-0.0240017	-0.0951224	0.010163	-0.0203305	-0.0103866	0.00685009	0.00503791	0.00996368	0.00956543	0.053686	0.00802636	0.0336934	0.00316486	-0.0161836	-0.0515859	0.00537437	-0.00916406	0.00152898	-0.00495659	-0.00336442	-6.2118e-05	0.00249019	0.00853108	0.00724826	0.0119262	0.00799496	-0.0185819	0.00676618	0.00344007	0.00498091	-0.0063191	0.00216892	-2.38613e-05	-0.00102229	0.00115818	0.00365524	0.00731905	0.0084846	0.00569705	0.00451081	-0.00807362	0.00529229	0.00120574	0.00298343	0.00300191
22	Palaeochiroptetryx	POLY (13)	N/A	Fossil	-0.0421306	-0.0935117	-0.0421358	0.00949728	0.0187672	0.0165171	0.00177417	-0.00600677	0.0032464	0.035611	-0.00708768	-0.0465161	0.0138025	-0.00550546	-0.0118903	0.013271	0.000870865	0.00973769	-0.00115652	-0.00185934	0.00240138	0.00427273	0.00624981	0.00508712	0.00136207	0.0114422	0.00926298	-0.00347267	0.00971648	0.00653306	0.00535429	0.00697823	-0.00243397	0.00156683	0.00270405	-0.00304283	0.00440646	0.0018008	0.00317372	0.0071326	-0.00986715	0.0052958	0.00502709	0.00714126	0.00623778
23	Pelobates	TADPOLE (11)	N/A	Fossil	-0.000393815	-0.0584811	0.030228	0.00511922	0.017423	-0.00115752	0.00433029	0.00192097	0.000214237	0.0440943	-0.0153365	-0.00039016	-0.00480858	-0.000903329	-0.0335576	0.0135673	0.00232922	0.00848974	-0.000427116	-0.00592203	-0.00398261	-0.00142386	0.00346894	-0.00263176	0.00263007	0.0140155	0.00277611	0.00880275	0.00132862	0.0042664	-0.00221461	-2.95032e-05	-0.000840621	-0.00802924	-0.00154289	-0.0010931	0.00154333	0.000338684	0.000607114	-0.00190309	-0.00762557	0.00414287	-0.00414527	-0.0071634	-0.00214744
24	Keuppia	OCTOPUS (2)	N/A	Fossil	-0.00841271	0.00543333	-0.0283878	0.00403976	0.0191011	0.0151613	0.00164218	0.0146525	0.00438907	0.0478414	0.00830552	-0.014855	0.0105151	0.00468092	-0.00272792	0.00880837	0.00421044	0.00814025	-0.012926	-0.00781553	-0.00634725	0.00363232	0.00703897	-0.00431164	0.00192842	-0.00503344	-0.0242571	-0.0195757	0.00219535	0.00520038	-0.00105303	-0.00503523	-0.00809489	-0.00148576	-0.00644704	0.00530282	-0.013173	0.00122091	6.63839e-05	-0.00908128	0.00023914	0.00098089	-0.00172612	5.24874e-05	0.00163328
25	Glyphiteuthis	SQUID (3)	N/A	Fossil	-0.00314593	-0.013658	-0.00782567	0.00196096	0.0136245	0.0153444	0.00720109	0.0111029	0.00738061	0.0512653	0.0031266	-0.00361643	0.0129989	-0.00414081	-0.00371405	0.0044314	1.84953e-05	0.00525683	-0.00309585	-0.00225928	-0.00362179	-0.000404166	-0.00177726	-0.000621064	-0.00190617	0.00306624	-0.0097017	-0.0142843	0.00380888	0.00276836	-0.00283875	-0.00205315	-0.00330469	-0.00336673	-0.00459678	-0.00221829	-0.00209676	0.000607665	-0.00158678	0.0010926	-0.00967028	-0.0103181	-0.00240911	-0.00268065	-0.00428372
26	Indeterminate Cephalopod	OLDSQUID (1)	N/A	Fossil	-0.000787424	-0.00904192	-0.0144963	0.00274106	0.0135837	0.0143777	0.00803306	0.0116798	0.00833132	0.0451934	0.0142866	0.0170997	0.0121951	-0.00439416	-0.0139433	-0.0157245	-0.00085465	0.0059786	-0.00180847	-0.00146394	-0.00224898	0.000729201	-0.000790855	0.00259886	5.94572e-05	0.00272472	-0.0283499	-0.0115839	0.00129825	0.00214231	-0.00219883	-0.00352336	-0.00483079	-0.000510608	-0.00354584	-0.000931125	0.00159852	0.000750579	-0.00214837	0.00159638	-0.00810329	-0.00971866	-0.00275067	-0.00198944	-0.00347498
27	Messelornis	MESSELORNIS (5)	N/A	Fossil	0.0156251	-0.0100248	0.0259657	0.00733859	0.0175365	-0.110266	0.00764247	0.0168497	0.00999728	0.0408259	-0.00147545	0.00402755	-0.0413956	0.0102535	-0.00169258	0.0247677	0.00403243	0.00771726	-0.00635649	0.00168856	-0.00302568	-0.0211742	0.00261761	0.00280219	0.00625287	0.0127103	-0.0111535	0.00402108	-0.022439	0.004993	0.00300593	0.00205427	-0.00076554	-0.00101257	-0.00172887	-0.0102596	-0.00510311	0.00171236	0.00339237	-0.00220265	0.00166381	0.00143044	0.000490205	0.00199678	0.00163897
28	Palaeobatrachus Eye	MesselFROG (7)	N/A	Fossil	-0.0134288	-0.054558	-0.0185309	0.00584824	0.0189492	0.00910781	0.00306877	0.00705224	0.00439259	0.0449266	-0.00348303	0.00597735	0.00785784	-0.0095855	-0.034995	-0.00945391	0.0110952	0.0102384	-0.00404215	-0.00497046	-0.00388851	0.00122204	0.00404207	0.000941025	0.00140596	0.00812829	-0.00775304	-0.00183725	0.00334962	0.0031719	-0.000960536	0.00289493	-0.00150679	-0.00238375	-0.00138173	0.000777516	0.00376572	0.00504468	0.00298083	-0.00352994	-0.00464795	-0.000586833	0.000341512	0.0020211	-7.8893e-05
29	Palaeobtrachus Skin	FROGnerve (8)	N/A	Fossil	-0.0105314	-0.0341777	0.00708031	0.00666345	0.0167313	0.00972378	0.00174402	0.00930396	-0.0483652	0.0455641	0.000313953	0.0116125	0.00871974	-0.00763699	-0.0239044	-0.0010224	0.0111794	0.010499	-0.00229532	-0.00335222	-0.00225636	0.00141279	0.00532702	0.00280164	0.0037427	0.00816159	-0.00822424	0.001161	0.00187123	0.00250365	-0.000705767	-0.000830619	-0.00821577	-0.00531243	-0.00126368	0.0011012	0.00119507	0.00356999	-0.0018606	-0.00149964	-0.00536797	-0.00222739	-0.00289635	-0.00270368	0.000207245
30	Cyclostome eye	LAMPREYeye (14)	N/A	Fossil	-0.00165906	-0.0548623	0.00451973	0.0071768	0.0199304	0.00705687	0.00365589	0.0018953	0.000901267	0.0423854	-0.00527146	0.00845482	-0.000614582	-0.00986446	-0.0442526	0.000909267	0.00907635	0.00758469	-0.00475302	-0.00658914	-0.00124484	0.0016234	0.00543536	0.00314402	0.00548072	0.00440101	-0.0232173	0.00027936	0.00232169	0.000784994	0.00242061	0.00325133	-0.00381151	0.000390733	0.00372832	0.00442563	0.00537672	0.00500743	0.00452979	-0.000693408	-0.0137557	-0.000886292	-0.00122425	-0.00272881	0.00136813
31	Tullymonstrum	Tullymonster_1	N/A	Fossil	-0.0204979	-0.111024	0.0180256	0.00306417	0.0208168	-0.00752555	-0.00139202	0.0229811	0.00708308	0.0597697	-0.00855448	0.023435	0.0120326	0.0134282	-0.0614638	0.00187815	-0.000414443	0.0112021	-0.00165292	-0.00437765	-0.00251593	-0.00168162	0.00522172	-0.00254246	0.00872823	0.00957951	-0.0153002	0.00369253	0.00143804	0.0027394	0.0031176	0.0059479	-0.00162825	-0.00262114	-0.000159687	0.000753028	0.00261428	0.00522724	0.00524474	0.00639463	-0.0184699	0.000545444	-0.00100202	-0.000487646	0.000260748
32	Tullymonstrum	Tullymonster_2	N/A	Fossil	-0.0304253	-0.0988772	0.0318403	0.00508491	0.0212255	0.00223389	-0.00238923	0.00632876	0.0086674	0.0545088	-0.000702624	0.032667	0.00416928	-0.0150927	-0.0554094	0.00744957	0.00661991	0.0104846	-0.00565849	-0.00848574	-0.00228453	0.00222609	0.00698526	0.00279345	0.00989037	0.00621922	-0.0199109	0.00303387	0.00271631	0.0059167	0.00258925	0.00556967	-0.00440121	-0.00506252	-0.000930132	0.00182371	0.00331165	0.00671886	0.00555256	0.0060838	-0.0179789	0.00014648	-0.00164015	-0.000551471	0.000712312
33	Yi qi	AR5_610_	814	Fossil	0.0108125	-0.0207665	0.058915	0.00363333	0.00941123	-0.0110564	-0.0220649	-0.0586391	-0.00218205	0.0461957	3.21389e-05	0.00291394	-0.00934385	0.000779932	-0.0203402	0.0203238	0.0114092	0.0125911	-0.00038387	-0.00468183	0.000573151	0.00193309	0.00530465	-0.00275041	0.00285105	0.00652416	-0.0108844	0.0111976	-0.000177097	0.00160804	-0.00192096	0.00390955	0.00340348	-0.000584504	-0.000837252	0.00194834	0.00290992	-0.012776	-0.000771998	0.00092703	-0.0321584	0.00152066	-0.00466099	0.000955342	0.00025523
34	Yi qi	AR5_611_	814	Fossil	0.0112258	-0.0166159	0.0658179	0.00238105	0.0074198	-0.0186887	-0.0253668	-0.112453	4.45872e-05	0.0452084	0.00197584	0.00823947	-0.0138824	0.00229567	-0.0193463	0.0236461	0.0134412	0.0133307	0.0018966	-0.00458904	0.000923576	0.000723508	0.00585539	-0.00803523	0.00420258	0.0121019	0.00257409	0.014198	-0.0011073	0.0022579	-0.00208046	0.00436926	0.00380429	0.00107716	0.00135508	0.00436065	0.00389086	-0.00850981	0.000362932	0.00237301	-0.0301036	0.00335366	-0.00497594	0.00224312	0.00154271
35	Sapeornis	AR5_710_	808	Fossil	0.0293725	0.0544109	0.0958468	-0.000540271	-0.000959507	-0.0249487	0.0149629	-0.320956	0.0129692	0.0482611	0.0158413	0.0371292	-0.0638575	0.0116724	-0.016823	0.0377979	0.0100536	0.0110283	0.00741016	-0.000870021	-0.00483731	-0.0243892	0.00837358	0.0075389	0.0129449	0.00995393	-0.0312913	0.0189165	-0.0321829	0.000550565	0.00247338	0.00584537	0.00492161	0.00458378	0.00577763	0.00655302	-0.000838672	0.00257195	-0.0026209	0.00250266	-0.000663294	0.00807334	0.00278091	0.00459064	0.00389175
36	Chicken	ChickPHEO (24)	N/A	Unmatured	0.0250143	0.0286229	-0.00968995	-0.00877216	-0.0323964	0.000374585	0.0124755	0.0142896	0.00652063	0.0421418	0.01253	-0.0174294	-0.0142058	0.00766893	0.0181572	0.0145822	-0.0108051	-0.0302097	-0.00158109	-0.00358656	-0.000634356	-0.00347535	-0.00197121	0.00038205	-0.00416915	0.00832636	0.00448339	-0.0045888	-0.00673142	0.00423052	-0.00382761	-0.010128	-0.00142278	0.00258734	-0.00354118	-0.0066288	0.00020125	-0.0023602	-0.00415325	-0.0193821	0.00853497	0.00164516	-0.00154073	-0.00232058	0.000386735
37	Crow	CrowEU (31)	N/A	Unmatured	0.0238721	0.0265799	-0.0129104	-0.00294746	-0.00829043	-0.00268706	0.0117938	0.014133	0.00715392	0.0359159	-0.00965227	-0.0329072	-0.00670029	0.00411357	0.0056332	-0.0117858	-0.00197169	-0.00908843	-0.000252076	-0.000227733	-0.000820712	-0.00202442	-0.00327072	-0.0044483	-0.00705105	0.013777	0.00739403	-0.00526219	-0.00304834	0.00515898	-0.000467801	-0.0023482	-0.00363426	-0.000191226	-0.000632277	-0.00254462	-0.00455501	-0.00138944	-0.00206029	-0.00409062	0.0045355	-0.00324413	-0.000956315	-0.00639449	-0.00129878
38	House Wren	HOWR (25)	N/A	Unmatured	0.0281833	0.0363458	0.0272193	-0.0115015	-0.0327461	0.00719722	0.0145703	0.0167968	0.00981543	0.0380861	-0.00800235	-0.0098006	-0.0283343	0.000977402	0.0139666	0.00781804	-0.0328813	-0.0296664	-0.00405572	0.00488848	-0.00016693	-0.000644221	-0.00099878	-0.00210716	0.000883113	0.00663656	-0.0151848	-3.87696e-05	-0.0100618	0.00561545	-0.00110672	-0.00703518	-0.000403202	0.00353426	-0.00496552	-0.0107946	-0.00481886	-0.0114526	-0.00294071	0.00127396	0.00629325	0.000352724	-0.0017813	0.00313186	0.000658596
39	Chicken	CHIX (30)	N/A	Unmatured	0.0220471	0.0246197	-0.0148132	-0.000795329	0.000230422	0.0149448	0.0119909	0.0121592	0.00495817	0.0298924	-0.0176354	-0.0390426	-0.00730221	0.0025276	0.0133634	-0.0143689	-0.00260805	-0.00448871	0.000966122	0.00382997	-0.00145108	-0.00216722	-0.00776123	-0.00964538	-0.0116103	0.0144873	0.00894412	-0.00656623	-0.00186905	0.00456701	0.00150808	-0.00145344	-0.000810472	9.33333e-05	-0.0023615	-0.00545054	-0.00750462	-0.00597048	-0.00513704	-0.00253927	0.005627	-0.0031614	0.00184382	-0.00531267	-0.000675187
40	Junco	JNCO (27)	N/A	Unmatured	0.0273884	0.0385146	0.0341111	-0.00567253	-0.0107767	-0.0146607	0.013952	0.0180453	0.0108791	0.0401066	-0.00597377	-0.00589869	-0.0383465	-0.00325709	0.0123869	0.00876793	-0.0315977	-0.0079281	-0.014752	-0.00402709	-0.00334167	-0.00235005	0.00140862	-0.000109898	0.00418059	-0.00904293	0.0135976	-0.00361835	-0.0201871	0.00193897	0.000730776	-6.56222e-05	-0.00205383	-0.00310639	-0.00675031	-0.0155237	-0.00575496	-0.0130557	-0.00268734	0.0045367	0.00533955	-0.000132882	-0.00178455	-0.000441688	-0.00302118
41	Mallard	GRCA (29)	N/A	Unmatured	0.0236515	0.0249079	-0.0171152	-0.000492588	0.00176284	-0.00799256	0.0114446	0.0139664	0.00738875	0.0352894	-0.00870413	-0.0263461	-0.00711594	0.00460577	-1.23038e-05	-0.0160886	0.00252744	-0.000332856	-0.000885168	-0.00231245	-0.00185225	-0.00419284	-0.00427923	-0.00606054	-0.00578104	0.0125136	0.00672504	-0.00701048	-0.00273693	0.00499696	0.000459362	-0.000290766	-0.00209101	-0.00357754	-0.000990491	-0.00301741	-0.00529457	-0.00366013	-0.00291372	-0.00245085	0.00432086	-0.00369198	-0.00191362	-0.00561717	-0.00245676
42	Dumetella carolinensis	D (26)	N/A	Unmatured	0.0271385	0.0212637	0.0390804	-0.0195745	-0.0230132	-0.0275376	0.0116714	0.010113	0.00572631	0.0384506	0.00842256	0.000771459	-0.0299825	0.000315266	0.0125063	0.0243565	-0.0164861	-0.0101331	-0.00855291	0.00349134	-0.00591477	-0.00155018	0.00142574	0.00424774	0.00289355	0.0108139	0.0166335	0.000975746	-0.0154902	-0.00120371	-0.000995338	-0.00176581	-0.00338445	-0.00636816	-0.0034683	-0.00893152	-0.00191679	0.00316988	-0.00804466	-0.0104512	0.00505391	-0.00175227	-0.00569429	-0.00629499	-0.00435617
43	Pigeon	PIGG (28)	N/A	Unmatured	0.0261218	0.0209845	0.0236345	-0.0114312	-0.0120705	0.0047234	0.0127975	0.0111107	0.00475515	0.0357158	-0.0152775	-0.0154331	-0.0202699	-0.00530958	0.00741479	0.000788398	-0.0118689	-0.00900219	-0.0100825	0.00375261	-0.0047103	-0.00271779	-0.00125005	-0.00320013	-0.0026972	0.0150342	0.0131154	-0.00109412	-0.0118077	0.00278625	-0.000537632	-0.00207349	-0.00165562	-0.00276539	-0.00413364	-0.00947349	-0.00478308	-0.00947598	-0.00388753	-0.00294634	0.005906	-0.000367341	-0.00191932	-0.00490382	-0.00290378
44	Turkey	B (32)	N/A	Unmatured	0.02317	0.0212272	-0.0236001	-0.00198215	-0.00614551	0.0135339	0.0121313	0.00760485	0.00575444	0.0342006	-0.0110258	-0.0369695	0.000508018	0.00409228	0.0058726	-0.0190493	0.00279888	-0.00720637	0.00110346	0.00102616	-0.00109127	-0.00174922	-0.00563003	-0.00665232	-0.00842763	0.014805	0.00723372	-0.00860509	-0.00157911	0.00594431	0.000274447	-0.00272246	0.000429587	0.000550023	-0.00126821	-0.00367767	-0.00580546	-0.00259365	-0.00290676	-0.000474562	0.00372705	-0.00376182	-0.00110633	-0.00523195	-0.000803285
45	Pigeon	PIDGprox (37)	N/A	Unmatured	0.0217037	0.0237604	-0.0263612	-0.00305542	-0.0128722	0.00808162	0.0111205	0.0118436	0.0045575	0.0339767	0.00650399	-0.0135084	-0.00334321	0.00266747	0.00590623	-0.018091	-0.0047656	-0.0125631	-0.00247581	-0.00216689	-0.00300284	-0.00227524	0.0042568	-0.00580144	-0.00810184	0.0129833	0.0112942	-0.000191467	-0.00336353	0.00128715	-0.00185879	-0.00115595	4.41699e-05	-0.000884013	-0.00308928	-0.00363832	-0.000674168	-0.00445213	-0.00563195	-0.0115685	0.00259958	-0.00602597	0.000608197	-0.00213004	-0.0024459
46	Pigeon	PIDGdistal (38)	N/A	Unmatured	0.0238681	0.021334	-0.000822802	-0.00445421	0.00292769	-0.0125232	0.0180744	0.0128352	0.00299022	0.036784	0.00321526	-0.0201064	-0.00686559	0.00173613	-0.000633483	-0.0106458	-0.0092249	-0.0102148	-0.00367022	-0.0054008	-0.00490475	-0.00780046	0.00274419	-0.00505127	-0.00839323	0.00952807	0.00468303	-0.00731433	-0.00836747	-0.00802597	-0.00191046	-0.00174759	0.000144392	-0.000432927	-0.00411536	-0.00585617	-0.000226997	-0.0051651	-0.00310213	-0.00203308	0.00781976	0.010074	-0.000302843	-0.00189768	-0.00217676
47	Frog Liver	FROGliver (35)	N/A	Unmatured	0.0209116	0.0254871	-0.0143051	-0.00683258	-0.0118114	-0.00389078	0.0118257	0.0122889	0.00693917	0.0372177	0.0035844	-0.019223	0.00246351	0.00556784	0.0240807	0.00665247	-0.00723352	-0.00831004	-0.00206954	-0.00334549	-0.00236427	-0.0051482	-0.00522899	0.000231189	-0.01032	0.00922091	0.00482854	-0.00917992	-0.00404766	-0.00469527	-0.00549732	-0.00999478	-0.00268621	-0.000275387	-0.00316726	-0.00514998	-0.00213928	-0.00380847	-0.00383474	-0.0016641	0.00307517	-0.00344543	0.000404914	-0.000851505	-0.00284472
48	Frog Eye	FROGeye (33)	N/A	Unmatured	0.0261906	0.0322884	0.0323307	0.00448663	0.0113315	-0.0636083	0.0132792	0.0162238	0.00929479	0.039121	0.009775	-0.00781971	-0.0725463	0.0105202	0.0128559	0.0198153	-0.00769166	0.00293721	-0.000211669	-0.0021333	0.00132598	-0.0259498	-0.000945987	0.00488805	-0.0016606	0.01438	-0.0150069	-0.00435817	-0.0114724	-0.0106783	0.00130773	0.00107198	0.000838025	-0.00024173	-0.0119965	-0.0162663	-0.00750196	8.5682e-05	-0.00178495	0.00111237	0.00525397	-0.00071501	-0.00206722	-0.000467938	-0.00431773
49	Frog Eye	FROGeye (34)	N/A	Unmatured	0.0271963	0.0359416	0.0248713	0.00132029	0.00469442	-0.0447196	0.0153781	0.0155338	0.0095472	0.0356121	0.00195053	-0.00505244	-0.0183872	0.00977548	0.0152875	0.0178249	0.000272981	0.00042105	-0.0021129	-0.00432563	-0.000608318	-0.00928394	-0.00234964	0.000425897	-0.00420688	-9.02539e-05	-0.0303421	0.000264813	-0.0226655	-0.0133172	9.13498e-05	-0.00148851	-0.00601366	-0.00598806	-0.00543997	-0.0115195	-0.0128307	-0.0055457	-0.00687719	0.000974233	0.00515868	-0.00160072	-0.00188629	-0.00286239	-0.00135298
50	Magpie Feather	MAGfeather (39)	N/A	Unmatured	0.0186476	0.0206998	-0.0110964	-0.0034667	-0.00595268	0.000200898	0.0113877	0.011805	0.00724219	0.0363797	0.00717936	-0.0142139	-0.000807962	0.00355906	0.0167358	0.00471009	-0.00557368	-0.00836366	-0.00444652	-0.0047864	-0.0039174	-0.00431948	-0.00438799	-0.000959359	-0.00649843	0.00840708	-0.00214618	-0.0133605	-0.00518844	-0.00586551	-0.00114217	-0.00335776	-0.000788173	-0.0023897	-0.00311088	-0.00519321	-0.00656609	-0.00507608	-0.00265691	0.00169889	0.00260008	-0.00743715	-0.000700379	-0.00144204	-0.00180453
51	Eumelanin Standard	PUREMEL (36)	N/A	Unmatured	0.0175892	0.0178142	-0.0123036	0.00829035	0.015535	0.00617585	0.00930358	0.0133678	0.00805331	0.0396396	-0.00833428	-0.0128673	-0.00313531	0.00509622	0.00516957	-0.00514855	0.0124581	0.007859	-0.0139257	-0.00219531	-0.00550819	3.27828e-05	0.00103184	0.00163566	-0.00112985	0.0114851	-0.00286075	-0.00296051	-0.00302861	-0.00727679	0.00100757	0.00179236	-0.00658772	-0.0117001	-0.00452537	-0.00995286	-0.00374866	-0.00149571	-0.00175947	-0.016	-0.000415279	-0.00167848	-0.00583101	-0.0115061	-0.00403935
52	Wrinkled Hornbill - Black	AR8_220_	1031	SEM~190°C	-0.00299751	0.0398743	-0.0195178	0.0083571	0.0185986	0.013344	0.00694388	0.00322582	0.00618459	-0.0671572	-0.00335128	-0.0184417	0.0104456	0.00170506	0.0243597	-0.0211311	0.0115605	0.00697105	0.00227743	0.00460933	-0.00142847	0.00298691	-0.00610354	-0.00133088	-0.0143805	-0.00921766	0.00783061	-0.00468557	0.00360913	-0.00128818	0.00225124	0.00178087	0.00258975	0.000508752	0.00153787	0.00204092	0.00215402	0.000913623	-0.00292126	-0.00668268	0.00496999	-0.00266077	0.000935909	-0.00450175	0.00117072
53	Common Pheasant -Reddish Brown	AR8_511_	1041	SEM~190°C	-0.0205934	0.0262219	0.00093323	0.00595614	0.0153734	0.0102729	-0.00248609	-0.000163654	0.00502816	-0.121006	-0.00366398	-0.00825466	0.00776526	-0.000549899	0.0226857	-0.00286676	0.00695961	0.00189185	0.00305613	0.00473529	0.0035326	0.00363035	0.000607296	0.00335739	-0.00419744	-0.0214105	0.00454863	0.00825789	0.00491958	-0.00208856	0.000734484	0.00136926	0.00190852	0.00283922	0.00431166	0.00584944	0.00469832	0.00703072	-0.00101756	-0.00071354	0.00385326	0.00350773	0.00205657	0.00256641	0.00237566
54	Pigeon - Grey	AR8_720_	1035	SEM~190°C	-0.0744318	0.00997313	0.0271175	0.0048403	0.0145954	0.00945932	0.0023458	0.00216751	0.00898176	-0.166923	0.00741245	0.0177231	0.0101992	-0.0106054	0.0159143	0.00875071	0.00401722	0.00302676	0.00356135	0.00511891	0.00710022	0.00861614	0.00756334	0.0092547	0.00677766	-0.0549895	0.00861608	0.0118385	0.00607715	0.00208559	0.00104097	0.00276395	0.00341088	0.0032858	0.00484158	0.00716805	0.00633296	0.0103218	0.00487057	0.0020686	0.00116957	0.00466424	0.00230454	0.00298311	0.00228388
55	Wrinkled Hornbill - Black	AR8_611_	1037	SEM~190°C	-6.29193e-05	0.0389719	-0.0292792	0.00914794	0.0191026	0.0130424	0.00608852	0.00256053	8.43066e-05	-0.0378906	-0.00140509	-0.0219781	0.0118233	0.000483314	0.0218617	-0.0280132	0.0124929	0.0093461	-0.000464376	0.00370555	-0.00365974	0.00288199	-0.00719259	-0.00120198	-0.0142164	-0.00359118	0.0099288	-0.00876421	0.00310251	-0.000691298	0.00265788	0.00359381	0.00280156	-0.000297273	0.000610442	0.000904005	0.00147521	0.000261862	-0.00201132	-0.00741121	0.00593497	-0.00444374	-0.000132381	-0.0059322	0.00131724
56	Pigeon - Grey	AR5_110_	1042	SEM~190°C	-0.0122757	0.0214943	0.00732014	0.0048858	0.0159449	0.00646207	-0.000971803	0.00687859	-0.00212288	-0.101689	-0.000483171	-0.00982544	0.00645024	-0.00145981	0.0161885	-0.00343852	0.01004	0.00581861	0.00216063	0.00320218	0.00244561	0.00417569	0.00121649	0.00289156	-0.00469191	-0.0142536	0.00420301	0.00438911	0.00432871	-0.000478313	0.00105357	0.00326193	0.0020823	0.00063793	0.000638837	0.003905	0.00402856	0.00620839	0.000919964	-0.00271733	0.00519081	0.00153153	0.00071386	-0.00244511	-0.00314357
57	White-rumped mannikin -Black	AR4_510_	1077	SEM~190°C	0.0263335	0.05379	-0.000139579	0.0101958	0.0210698	0.0147043	0.0119009	0.0134753	0.00321113	0.0219425	0.0110216	-0.205064	0.00723928	0.0134457	0.0338275	0.0196837	0.0151512	0.0134453	0.0071818	0.00699434	0.00595732	0.00818089	-0.0113707	-0.0130335	-0.0464027	0.00368457	0.0206345	0.0155708	0.00693	0.00214755	0.00200514	0.00141092	0.00220477	0.00366079	0.00221108	0.00498999	0.00467582	-0.118595	-0.00768546	-0.00366809	0.00971288	0.00686622	0.000101161	-0.000198116	-0.000895859
58	Shrenck's Bittern - Reddish Brown	AR4_610_	1078	SEM ~200°C	-0.0180303	0.00710222	-0.0302861	0.00447726	0.0108202	-0.00130055	-0.0193133	-0.00127493	-0.012754	-0.0114218	0.00607752	-0.00318172	0.00933091	-0.00881897	0.0102811	-0.0188557	0.0109728	0.00481386	-0.00349072	0.00193612	0.0013087	0.00538112	0.003568	0.00527609	-0.00157795	0.00380707	0.0134575	0.00207634	0.00544279	-0.00531427	0.000500398	0.00322118	0.000108689	-0.000862339	-2.0294e-06	0.00394626	0.0047087	0.00701252	0.00302173	-0.0043332	0.00300945	0.000824426	0.000808491	-0.000845834	-0.00154507
59	Shrenck's Bittern - Grey	AR4_710_	1079	SEM ~200°C	-0.01938	0.00138199	0.0251031	0.000372112	0.014195	-0.0234411	-0.0672805	-0.00955539	-0.0256887	-0.0294909	0.00361544	0.00728206	0.00250931	-0.0040944	0.0140884	0.0134636	0.009395	0.00996277	0.00135391	0.00188248	0.00522478	-0.000118821	0.00378071	0.00454755	0.00412835	0.00174118	0.0172444	0.0131736	0.00418387	-0.021807	0.0010342	0.00327896	0.00339771	0.00219497	0.00355338	0.0060742	0.00564928	0.00789774	0.0036004	0.00107715	-0.000360068	0.00493539	0.00110325	0.00267815	0.00198239
60	Pigeon-iridescent	AR4_810_	1080	SEM ~200°C	-0.0129981	0.0207917	0.0104728	0.00362917	0.0154313	-0.0172415	-0.0354592	-0.00472859	-0.0128819	-0.039264	0.00658558	-0.0122367	0.00664725	-0.00193441	0.0175246	0.00334653	0.0109659	0.00990391	0.000707681	0.00267938	0.00271489	0.00361571	0.00243826	0.00296665	-0.000454682	-0.00438487	0.015058	0.00559607	0.00437465	-0.0128328	0.00143883	0.00244518	0.00325284	0.000501416	0.00114055	0.00398097	0.00450406	0.00251529	0.00178391	-0.00207092	-0.00143187	0.000670435	9.2767e-05	-0.00197387	-0.00266611
61	Common Pheasant -Reddish Brown	AR8_321_	1026	SEM ~200°C	-0.0229696	0.030229	0.0114501	0.00775861	0.0185493	0.00756186	-0.00835802	0.002931	-0.00983546	-0.112083	0.00422191	-0.000131905	0.0111593	0.000950802	0.0208072	0.00052487	0.00932999	0.00612121	0.00386905	0.0047381	0.00338282	0.00571561	0.00051032	0.00453952	-0.000980744	-0.0375795	0.0039301	0.00431285	0.00536975	-0.00147234	0.00249258	0.00351414	0.00348829	0.00218067	0.00197185	0.00476103	0.00377086	0.00668508	0.00231735	-0.00182119	0.00483075	0.00140861	0.00115922	-0.00289981	0.00254191
62	Turkey - iridescent	AR8_411_	1028	SEM ~225°C	-0.0204254	0.0338996	0.0152902	0.00743496	0.0183578	0.00860401	-0.0178392	-0.000965711	-0.00336765	-0.0994935	0.000260379	-0.00240975	0.00985324	0.00600266	0.0230603	-0.00244828	0.00840563	0.00507086	0.00361891	0.00473331	0.000903518	0.00282522	-0.00234901	0.00218331	-0.0052788	-0.0247468	0.00322454	0.00425583	0.00459632	-0.00695421	0.0030867	0.00231137	0.00413703	0.00293845	0.00329593	0.00553771	0.00467991	0.00372683	-0.00057016	-0.00202985	0.00338052	0.00126367	0.00247862	-0.00109605	0.00172208
63	Wrinkled Hornbill - Black	AR8_711_	1030	SEM ~225°C	-0.078093	0.00688678	0.0210121	0.00516703	0.0153012	0.0114086	0.00801836	0.00568857	0.0118136	-0.173489	0.00735107	0.0151808	0.0103147	-0.0124805	0.0148222	0.00659926	0.00532841	0.00308716	0.00256472	0.00493241	0.00660578	0.00809208	0.00799502	0.00929769	0.00604775	-0.0515464	0.00880776	0.0116471	0.00614204	0.00354299	0.00131169	0.00304967	0.00359315	0.00330732	0.00493095	0.0072336	0.00621498	0.0103425	0.00500814	0.00161589	0.00279195	0.00516509	0.00265309	0.00309905	0.00367298
64	Pigeon - Grey	AR8_820_	1045	SEM ~225°C	-0.00299726	0.0398742	-0.0195178	0.00835732	0.0185984	0.0133439	0.00694361	0.00322585	0.00618432	-0.0671571	-0.00335133	-0.018442	0.0104458	0.00170506	0.0243597	-0.021131	0.0115607	0.00697094	0.00227746	0.00460905	-0.00142829	0.00298712	-0.00610377	-0.00133113	-0.0143806	-0.00921743	0.00783076	-0.00468575	0.0036091	-0.00128814	0.00225144	0.00178087	0.0025896	0.000508703	0.00153813	0.00204099	0.00215398	0.000913321	-0.00292137	-0.00668291	0.00497022	-0.00266078	0.000935607	-0.0045017	0.00117047
65	Common Pheasant -Reddish Brown	AR9_111_	1065	SEM ~225°C	-0.0497705	0.00818725	0.0899779	0.00174896	0.0164289	-0.00937369	-0.0495047	-0.0214803	-0.0219356	-0.170649	0.00909792	0.0384638	0.00957843	-0.00208894	0.0176095	0.0360953	0.00325043	0.00646928	0.00706663	0.00482137	0.00983107	0.00971731	0.00517545	0.00859039	0.0126145	-0.0501622	0.0126917	0.0181707	0.00496606	-0.0185829	0.00105197	0.00153949	0.00495668	0.00514382	0.0071555	0.00837376	0.00749446	0.0111092	0.00611658	0.00588318	-0.00790988	0.00580261	0.00237129	0.00513101	0.00315262
66	Wrinkled Hornbill - Black	AR9_211_	1058	SEM ~250°C	-0.025911	0.0126153	0.0284027	0.00669002	0.0187047	0.00464844	-0.0179678	0.00266796	-0.0453019	-0.111771	0.0062286	0.011865	0.0111205	-0.00356113	0.0120501	0.0111393	0.00990957	0.00761302	0.00297729	0.00379024	0.00530125	0.00785102	0.00407796	0.00686619	0.00374829	-0.0298995	0.00704176	0.0104499	0.00624571	-0.00248787	0.00192367	0.00385235	0.0039034	0.00191728	0.00196974	0.00580201	0.00375161	0.00928923	0.00423682	-0.000870708	0.00426989	0.00434831	0.00139379	-0.00032458	0.00325928
67	Pigeon - Grey	AR9_321_	1061	SEM ~250°C	-0.044676	0.0191891	0.0763271	0.00439613	0.0177379	0.000269937	-0.0359395	-0.00100151	-0.0490202	-0.175975	0.0106122	0.0303682	0.0103662	-0.00101783	0.0190503	0.0317533	0.00645181	0.00551415	0.00753285	0.00608648	0.00971119	0.00997	0.00647028	0.00941096	0.0105211	-0.0577393	0.00658003	0.0161463	0.00655634	-0.0100637	0.00231532	0.00399148	0.00476907	0.00454067	0.00597555	0.00780915	0.00687953	0.0107706	0.00571996	0.0042371	0.00247076	0.00615804	0.00278172	0.00428559	0.00380153
68	Turkey - iridescent	AR9_410_	1056	SEM ~250°C	-0.0327939	0.0239115	0.0602225	0.00500069	0.0177522	0.000921779	-0.047127	-0.00825908	-0.026668	-0.147435	0.00799154	0.0244202	0.00840597	0.00235829	0.0225024	0.0229888	0.00676532	0.0043873	0.00643648	0.00540335	0.00748502	0.00642716	0.00482156	0.00800277	0.00708616	-0.0411476	-0.00123534	0.0138707	0.00544379	-0.0169744	0.00187536	0.00258571	0.00410098	0.00412216	0.00622536	0.00732541	0.00653508	0.00932227	0.00394082	0.00351769	-0.00105206	0.00496366	0.00271029	0.00349788	0.00294349
69	Turkey - iridescent	AR9_510_	1057	SEM ~250°C	-0.0426609	0.0239558	0.0597947	0.00518234	0.0175776	-0.002139	-0.0510827	-0.00759802	-0.0259037	-0.133562	0.00992412	0.0254357	0.00952855	-0.00122932	0.019466	0.0219227	0.00750946	0.00600056	0.00583113	0.00518477	0.00738134	0.00790955	0.005385	0.00871192	0.00797564	-0.0440441	0.00776168	0.0131546	0.00587707	-0.0144851	0.00232124	0.00343236	0.00432941	0.00363055	0.00466453	0.00663322	0.0055271	0.00975496	0.00489542	0.00249301	0.000929895	0.00474499	0.00202293	0.0022082	0.00288533
70	Common Pheasant -Reddish Brown	AR9_611_	1064	SEM ~250°C	-0.0306907	0.022247	0.094047	0.00383918	0.0171452	-0.0181337	-0.109187	-0.0222621	-0.0401142	-0.120007	0.0126469	0.0419426	0.0106247	0.00329844	0.0227661	0.0380186	0.00517957	0.00830335	0.00783307	0.00558327	0.010557	0.0104029	0.00514939	0.00973252	0.0138711	-0.0311865	0.0171064	0.0194685	0.00595998	-0.038129	0.00231281	0.00250918	0.00551835	0.0057338	0.00735505	0.00834831	0.00762763	0.0109906	0.0061826	0.00593992	-0.00486656	0.00696317	0.00254089	0.00514886	0.00368658
71	Wrinkled Hornbill - Black	AR9_720_	1059	SEM ~250°C	-0.033412	0.0113889	0.0454525	0.00537802	0.0177509	0.000287855	-0.012577	-0.00216114	-0.0422434	-0.147952	0.00602885	0.0189593	0.0102719	-0.00304237	0.0139985	0.0185112	0.00701808	0.00608221	0.0049352	0.00448816	0.00667772	0.00766664	0.00287259	0.00684578	0.00587719	-0.041388	0.00472693	0.0124071	0.00534201	-0.00071947	0.00133311	0.00227027	0.00398741	0.00308927	0.00399124	0.00649871	0.00520387	0.00988432	0.00469122	0.00133418	0.000682036	0.00518632	0.00144431	0.00131755	0.00285949
72	Pigeon - Grey	AR9_820_	1060	SEM ~250°C	-0.0373477	0.0218507	0.0813878	0.00439001	0.0176786	-0.00125043	-0.0344113	0.000422014	-0.0509734	-0.197416	0.0110398	0.031263	0.00999359	-0.000139622	0.0205327	0.0335113	0.00641027	0.00483949	0.00823457	0.00631966	0.0101151	0.00987997	0.00647903	0.00951537	0.011108	-0.0558567	0.00803124	0.0167539	0.00651727	-0.0110523	0.00229145	0.00370213	0.00483552	0.00469338	0.00632654	0.00783841	0.00708878	0.0108296	0.00585673	0.00475813	0.00223391	0.00643457	0.00290601	0.00472703	0.00386988
73	Wrinkled Hornbill - Black	AR5_510_	1053	SEM ~250°C	-0.0150441	0.0199827	0.0886366	0.00195088	0.0143255	-0.0356866	-0.0894332	-0.00408239	-0.0693983	-0.107373	0.0103692	0.0203778	0.00221198	0.0053052	0.0237527	0.0387606	0.00983313	0.00944966	0.00851048	0.00415721	0.00927181	0.00585605	0.00168904	0.00560861	0.00980359	-0.012873	0.0173657	0.0204528	0.00394387	-0.0163234	0.00145654	0.00134402	0.0046047	0.00571488	0.00760617	0.00849497	0.0073149	0.00429017	0.00465073	0.00571578	-0.00340161	0.00660502	0.00113651	0.0045785	0.00388725
74	Common Pheasant -Reddish Brown	AR8_120_	1047	SEM ~300°C	-0.00825094	0.0373465	-0.0085994	0.00815601	0.018584	0.0136777	0.00702208	0.0031462	0.00521818	-0.103243	-0.0038022	-0.0168638	0.00914043	0.00218051	0.0247747	-0.0136294	0.0105351	0.00473783	0.00248448	0.00473988	-0.000290721	0.00212432	-0.00400026	0.000423669	-0.0105562	-0.0177407	0.00425775	-0.000216641	0.00401729	-0.000206449	0.00232302	0.00242676	0.00333407	0.00200038	0.0031083	0.00358718	0.00323378	0.00294498	-0.00220208	-0.00370605	0.0051886	7.24839e-05	0.00193931	-0.00130845	0.00178297
75	White-rumped mannikin -Black	AR4_110_	1073	SEM ~300°C	-0.0316124	0.0336698	0.0826231	0.00321709	0.0165108	-0.0181988	-0.043852	0.000360836	-0.0262022	-0.192643	0.0130516	0.00570226	0.00608661	0.00356037	0.025099	0.0388524	0.00876096	0.00504062	0.00951212	0.00627616	0.0100679	0.00789224	0.00482293	0.00417569	0.00944854	-0.0600426	0.00860229	0.0176382	0.00588865	-0.0137388	0.00224329	0.00285441	0.00475458	0.00570081	0.00741204	0.00855341	0.00723363	0.00460254	0.00550742	0.00550926	0.00245011	0.00751104	0.00263669	0.00559997	0.00490074
76	Shrenck's Bittern - Reddish Brown	AR4_210_	1074	SEM ~300°C	0.0217958	0.0538125	-0.0145454	0.00977732	0.0198071	0.00835043	-0.00596638	0.00713366	-0.00148039	0.00312045	0.0124315	-0.212058	0.00814775	0.0141147	0.0369485	0.0235591	0.00826839	0.0112093	0.00887864	0.00731016	0.00504587	0.00843713	-0.0148751	-0.0148097	-0.0455621	0.00166411	0.0214977	0.0186277	0.0068228	-0.00222925	0.00242944	0.00164789	0.00318377	0.00556762	0.00614624	0.00667722	0.00610409	-0.0635728	-0.00279405	-0.000743631	0.00910762	0.00859683	0.00154422	0.00280636	0.00211195
77	Shrenck's Bittern - Grey	AR4_310_	1075	SEM ~300°C	-0.0077395	0.0355667	0.0515432	0.0031137	0.0154477	-0.0388599	-0.0881771	-0.0227925	-0.0111162	-0.00886002	0.0110658	-0.0448244	0.0049152	0.00593512	0.0275246	0.032975	0.00942411	0.00966795	0.00384415	0.00190697	0.00371283	0.00173109	-0.00164431	-0.00167982	-0.00290129	0.00047561	0.0218648	0.0192263	0.00346133	-0.0289067	0.000468002	-0.000716143	0.00352533	0.00317744	0.00584604	0.0064735	0.00478573	-0.0122546	0.00192798	0.00198252	-0.00353289	0.00438007	-0.0013906	0.00270897	0.00200974
78	Pigeon-iridescent	AR4_410_	1076	SEM ~300°C	-0.0275554	0.0252913	0.0969703	0.000493558	0.0126423	-0.018556	-0.0564516	0.00328365	-0.0149972	-0.211724	0.0103046	0.0351128	8.68112e-05	0.00349145	0.0230917	0.0400015	0.00755989	0.00571542	0.00917011	0.00487924	0.010379	0.00720866	0.00527519	0.00705736	0.0127722	-0.0384323	0.00977444	0.0188907	0.00487964	-0.0155254	0.00157862	0.00229768	0.00460697	0.00574921	0.00719832	0.00833162	0.00729635	0.0107028	0.00531606	0.00596228	-0.000432465	0.00607228	0.0017338	0.0049018	0.00420411
79	Wrinkled Hornbill - Black	AR5_410_	1052	SEM ~300°C	-0.0221115	0.0149696	0.0941077	0.000541173	0.0116606	-0.0298485	-0.0601491	0.00285595	-0.074347	-0.151191	0.00902717	0.031685	-0.00139136	0.00328448	0.0216149	0.0390747	0.00830337	0.00788011	0.00886391	0.00427574	0.00960459	0.00724488	0.00074476	0.00598214	0.0110244	-0.019604	0.012987	0.0197997	0.00384785	-0.00616827	0.000951617	0.00071767	0.00446004	0.00575709	0.00725859	0.00875238	0.00715195	0.00866753	0.00454287	0.00577382	-0.00155633	0.00669294	0.00101385	0.00466439	0.00396516
[truncated: 10 more columns]

## Sheet: PCA All Loading Matrix
Fragments	Prin1	Prin2	Prin3	Prin4	Prin5	Prin6	Prin7	Prin8	Prin9	Prin10	Prin11	Prin12	Prin13	Prin14	Prin15	Prin16	Prin17	Prin18	Prin19	Prin20	Prin21	Prin22	Prin23	Prin24	Prin25	Prin26	Prin27	Prin28	Prin29	Prin30	Prin31	Prin32	Prin33	Prin34	Prin35	Prin36	Prin37	Prin38	Prin39	Prin40	Prin41	Prin42	Prin43	Prin44	Prin45	Prin46	Prin47	Prin48	Prin49
C4	-0.79348	-0.38106	-0.20128	-0.04774	0.23837	-0.03233	-0.16816	-0.08804	-0.12061	-0.00946	0.00262	0.03066	-0.05646	-0.05090	-0.12737	-0.05512	-0.01303	-0.11599	-0.00379	0.02184	0.03558	-0.04171	0.00257	-0.05448	-0.05527	-0.01838	-0.00904	0.07842	0.02818	-0.04577	0.06036	-0.03122	-0.00313	-0.01475	0.04219	0.02188	0.02052	0.05401	-0.01222	-0.00585	-0.01036	0.02514	0.01504	0.02241	0.02657	0.0431	0.0083	0.00061	0.01183
C4H	0.07623	-0.81131	0.00647	-0.30771	-0.06855	0.31344	0.0159	0.10962	-0.00309	0.23551	-0.04816	-0.08057	-0.06079	-0.07921	0.01162	0.06356	-0.05009	-0.02790	-0.04196	0.10231	-0.08420	-0.05499	0.01711	-0.03650	-0.06873	0.04013	0.01072	0.02989	-0.06985	-0.01126	0.04315	-0.02188	-0.02477	-0.00417	0.0199	0.00186	-0.03911	0.01723	-0.01687	0.02298	0.00106	0.00984	-0.01034	0.01441	-0.00560	-0.00721	-0.02381	-0.00886	-0.00396
C3N	0.649	0.00922	-0.46777	-0.43664	-0.05497	-0.14738	0.08487	0.11878	-0.05761	-0.06429	-0.16810	-0.10950	-0.03756	-0.12456	0.02711	-0.00020	-0.13595	0.04346	0.09021	0.00236	0.05064	-0.01351	-0.07494	-0.03089	0.00595	0.02168	-0.04405	-0.06204	-0.04893	0.00285	0.00362	-0.01454	0.00175	-0.01631	-0.03262	-0.00719	-0.04849	-0.01300	-0.05476	0.00528	-0.02902	-0.03633	0.02036	-0.00469	0.0211	-0.02263	0.01862	0.00483	-0.00560
C2HS	0.34168	0.22413	0.58716	-0.51734	0.05939	0.2444	-0.14980	-0.05350	0.11552	-0.01862	-0.06450	-0.01886	-0.02908	0.10658	0.0472	-0.02572	-0.04487	-0.05195	-0.03970	-0.00223	-0.13108	0.18652	0.09352	-0.07170	-0.09284	0.01358	-0.06998	0.01948	-0.03914	0.02811	-0.01957	-0.01335	0.05233	0.02956	0.0135	0.02639	0.0325	-0.00862	0.01173	0.03876	0.00581	-0.01884	-0.01486	-0.02765	0.01725	0.00029	0.00216	-0.02080	-0.00712
CNS	0.39801	0.37143	0.41605	-0.60341	-0.02318	0.17971	-0.03059	-0.09050	0.10568	-0.05954	0.04365	0.0365	0.06994	-0.06317	0.00535	-0.08597	0.02413	0.0188	-0.16941	0.00295	0.09451	-0.03460	-0.14770	0.04539	0.02226	-0.08247	-0.05864	-0.05694	0.01623	-0.02692	0.01143	0.05536	-0.00831	-0.02015	0.00012	0.04249	-0.02396	0.00605	0.05276	-0.02455	0.00442	0.01019	-0.02078	-0.01065	0.01679	-0.00734	-0.01047	0.00398	0.02841
C2H3O2	-0.13391	0.06111	0.6239	0.4975	-0.14619	-0.10101	0.13842	0.28526	-0.21700	0.0947	-0.00656	-0.09506	-0.10562	-0.20951	-0.10756	0.06514	-0.01750	-0.04741	-0.02231	0.11088	0.14354	0.1214	-0.00866	0.00387	0.04803	0.0701	-0.02350	0.00813	0.01875	0.04359	0.04484	0.0065	0.05701	-0.00692	-0.05140	-0.01584	0.03735	-0.00125	0.03551	-0.00784	0.02036	-0.00974	-0.01128	0.01163	0.00215	0.00045	-0.00657	0.01824	-0.01488
C5H	-0.78069	0.09671	0.14468	0.21807	0.26102	0.2314	0.24844	0.18242	-0.02209	0.06792	-0.04855	-0.11393	0.13815	0.04976	-0.02329	-0.13062	-0.02482	0.11925	0.01765	-0.00163	0.02845	0.0226	0.04283	-0.00780	-0.01184	-0.02219	-0.01740	-0.00027	-0.01572	0.02709	0.03768	-0.01356	0.0503	-0.04815	0.0203	-0.02426	0.04097	0.06068	-0.02471	0.00127	0.02262	-0.01521	0.00992	-0.02093	0.00648	0.00018	0.01531	-0.00286	0.02145
C4N	-0.22715	-0.11034	0.29148	0.26806	-0.44592	-0.15036	0.2656	-0.34832	0.45258	-0.23042	-0.16388	-0.03436	0.0718	0.0935	0.07702	-0.14934	0.09078	-0.02102	0.02614	-0.06383	0.00594	-0.08373	-0.02670	-0.07569	0.01197	-0.02169	-0.00029	-0.03901	0.0106	-0.01593	0.00326	-0.02573	-0.02691	0.02064	-0.01364	-0.04571	0.0469	0.02315	-0.00441	-0.00209	0.0238	0.00242	-0.00680	0.02099	-0.00575	-0.00719	-0.00086	-0.00623	-0.01974
C4HN	-0.71828	0.13035	0.10357	0.09341	0.26878	0.14759	0.05746	0.17216	-0.03291	0.01781	0.05464	-0.07516	0.17285	-0.04802	0.29577	0.24536	0.22256	0.13081	0.07841	-0.04934	-0.03544	0.00502	-0.13777	-0.13964	-0.00663	0.04172	-0.01109	0.07586	0.016	0.01238	-0.04688	0.05632	0.00543	-0.01048	0.03094	0.00031	0.00097	-0.02947	-0.00600	-0.00477	-0.00010	0.01067	-0.00428	0.00403	0.00484	0.0083	0.00468	0.001	0.00027
C4H2N	-0.85863	0.22507	-0.09924	0.03929	0.25255	-0.18918	-0.13627	-0.01117	-0.02594	-0.12404	0.12045	0.11037	-0.08942	-0.00158	-0.07307	0.03973	0.0509	-0.10632	-0.00785	-0.00512	-0.03335	0.02221	-0.00286	0.04153	0.01128	0.00326	0.02279	-0.00245	-0.01100	0.01859	-0.02555	0.02389	-0.00779	-0.00937	-0.00649	0.03651	0.00045	-0.01456	0.01208	0.0055	-0.01389	-0.00680	0.00712	0.00562	-0.03185	-0.01355	-0.02525	-0.00856	-0.00361
C4HO	0.45725	-0.21788	-0.24053	-0.23427	-0.12849	-0.13974	-0.09383	0.44979	0.31142	0.1641	0.35737	0.00446	0.12751	0.11516	-0.16453	-0.04927	0.14142	0.04983	0.00081	0.08505	0.07733	-0.05556	0.08251	-0.07115	0.05916	-0.01627	0.07564	-0.07716	-0.03474	-0.00501	-0.00791	0.00979	0.02089	-0.03078	0.01091	0.03803	-0.00022	-0.01680	-0.00410	0.02326	0.02263	0.01818	-0.00938	-0.00296	0.01664	0.00476	0.00911	-0.00359	-0.01607
C3NO	0.23182	0.47289	-0.49582	0.32742	-0.39401	0.26231	-0.18941	-0.05135	-0.17278	0.15367	-0.07634	-0.02385	0.05743	0.04763	-0.03009	-0.00481	-0.06762	-0.00014	0.0222	0.0175	-0.01726	-0.05556	0.05944	-0.07632	0.01812	-0.06497	-0.01590	0.01521	0.07737	0.01514	-0.01946	-0.01897	-0.03026	-0.01592	-0.04738	-0.04488	-0.00065	-0.03122	0.01366	0.0078	-0.01059	0.02107	-0.02038	-0.04815	0.00983	0.0121	0.00335	0.00025	0.00475
C3H3O2	0.28875	0.06541	0.6588	0.41566	-0.36446	-0.28095	-0.10678	0.02251	0.02134	0.01197	-0.01161	0.07226	-0.05109	0.0455	-0.06337	0.05965	0.06006	0.11007	0.07129	0.00821	-0.05125	-0.02687	0.03714	0.04234	-0.07242	-0.11851	0.02526	-0.02765	0.03524	-0.00436	0.00457	0.01665	0.05342	0.02433	0.02941	0.02826	-0.01790	-0.00668	-0.06682	-0.00303	-0.02237	-0.03482	-0.01634	-0.01133	-0.01249	0.02957	-0.01608	0.02185	0.0078
C6	-0.11883	-0.64061	-0.17591	-0.18182	0.28174	-0.02015	-0.28211	-0.01877	-0.06959	-0.12628	-0.39897	0.18036	0.02956	0.09303	-0.04604	-0.06441	0.16543	0.17984	0.07077	0.08468	0.15606	0.02418	0.03281	0.04227	0.06387	-0.04336	-0.00836	0.05247	-0.00733	0.07669	0.02481	0.00429	-0.00279	0.07219	0.01001	-0.00537	-0.01753	-0.01697	0.03097	0.03746	0.00376	-0.00507	0.00753	0.00244	0.00291	-0.00205	-0.00066	-0.00187	0.00178
C6H	0.28386	-0.80549	0.11529	-0.20459	-0.17522	0.25301	0.06969	-0.01285	0.16081	0.16714	0.04321	-0.09828	-0.09784	-0.00919	0.09282	0.02326	0.05556	0.00376	-0.02798	-0.02521	-0.03191	0.00179	0.06014	0.08574	-0.04506	0.00853	0.01369	0.05385	0.01331	-0.01725	-0.00938	-0.02619	-0.02135	0.03992	0.01458	0.0019	-0.02809	-0.00727	0.03528	-0.03254	0.02716	0.00526	0.00236	-0.02055	-0.00835	0.00248	0.00545	0.0213	-0.00570
C5N	0.56919	-0.05277	-0.45536	-0.43887	0.02836	-0.21895	0.02731	0.18652	0.23239	-0.07885	0.05983	-0.12560	-0.08922	-0.03039	-0.03209	-0.01495	-0.02800	0.09872	-0.00684	-0.15578	0.11096	0.1379	0.00067	0.05225	-0.02847	0.0401	0.04657	0.06125	0.04526	-0.08567	-0.04791	0.00494	0.04193	0.06255	-0.00635	-0.02965	0.01382	0.02171	-0.00031	-0.04313	-0.02019	0.00839	0.00053	-0.01067	-0.00305	0.0167	0.00195	-0.00671	-0.00282
C4HS	0.43053	0.27049	0.48577	-0.49807	0.04964	0.04304	-0.13067	-0.08621	-0.08594	0.17261	0.13463	0.21891	-0.04760	0.05738	-0.01906	-0.10691	-0.12022	0.11289	9e-05	-0.03833	-0.09422	-0.04425	-0.10254	-0.08735	0.06884	0.08085	0.07672	0.00967	0.12255	0.06049	0.05191	-0.07484	0.05655	0.02109	0.02595	-0.01420	-0.02012	-0.00710	0.00272	-0.01297	0.01623	-0.00351	0.0156	0.01723	-0.00599	-0.00750	0.00683	0.00427	-0.00323
C3SN	0.45559	0.4353	0.37392	-0.56889	0.10367	0.00435	-0.16913	-0.09799	-0.01382	-0.07892	0.10109	0.00728	0.05542	0.00388	-0.05622	-0.00273	-0.00493	0.08909	-0.06867	0.01005	-0.02307	-0.09019	0.00133	0.12592	-0.01263	0.04217	-0.09772	0.0498	-0.03999	0.00891	-0.03917	0.04466	-0.00875	-0.02398	-0.01917	-0.02970	0.04979	0.01138	-0.02390	0.05296	-0.02049	0.0264	0.00801	0.01447	-0.00986	0.01515	0.01571	0.02712	-0.01840
C7	0.64412	-0.46335	0.06603	0.26114	0.19111	-0.03741	-0.33217	0.01061	-0.15926	0.02327	-0.02674	-0.00196	0.13255	-0.01466	-0.04748	-0.20667	-0.04577	0.08567	0.09199	-0.00389	-0.07541	0.11546	0.01851	-0.05637	0.0351	0.02128	-0.03034	-0.04243	-0.00287	-0.00439	-0.03631	0.05304	-0.01740	-0.01910	-0.00887	0.04486	0.04354	0.01	-0.01893	-0.05010	-0.01296	0.03553	0.0151	-0.00178	-0.02400	-0.01862	-0.01255	-0.00851	0.00066
C7H	0.5136	-0.67589	0.11901	0.10843	-0.01860	0.17122	0.08902	-0.04064	-0.10478	-0.02600	-0.09938	-0.18166	0.12803	0.17898	-0.04028	0.09115	-0.02591	-0.06557	0.08954	-0.00059	-0.07290	-0.07332	-0.09745	0.19154	0.12445	0.05816	-0.03324	-0.03303	0.04871	0.01748	0.00252	0.01432	0.05692	-0.02119	0.0383	0.01167	0.00053	0.01	-0.00789	-0.01376	-0.01332	0.0066	-0.00799	-0.01351	0.02046	0.01402	-0.00891	-0.01928	-0.01441
C6N	0.86293	-0.33562	-0.04337	0.12535	-0.04066	-0.10910	-0.01261	-0.03542	0.11169	-0.08739	-0.08319	-0.11800	0.00286	-0.00778	0.04596	-0.12051	0.05464	0.00204	0.03008	0.08224	-0.10850	0.07243	0.00333	-0.00888	0.01679	0.03178	0.04413	0.03977	-0.01086	0.02398	-0.02718	-0.06287	-0.05628	-0.07049	0.02003	0.0279	0.01663	-0.02850	0.02416	-0.01006	-0.02356	-0.00326	0.00629	0.00128	0.00293	0.0039	0.01103	0.04091	0.01129
C6HN	0.5814	-0.05810	0.47945	0.21089	-0.34824	-0.34511	0.17365	0.04022	-0.03460	-0.02838	-0.06841	-0.18584	-0.15821	-0.00389	-0.05498	0.07875	0.04536	-0.00635	-0.05097	0.07628	-0.01348	-0.02735	-0.04900	0.01289	-0.04318	-0.06462	0.02629	0.03871	0.04055	-0.02250	0.00556	-0.00008	0.0168	0.01623	0.0132	0.04237	0.03178	-0.04946	0.01158	0.02598	-0.01106	0.03076	0.04491	0.00517	0.00613	-0.02232	0.02738	-0.02647	0.01375
C6H2N	0.48274	0.63677	-0.34204	-0.16755	-0.09905	-0.02348	0.22754	0.17961	-0.01274	0.01349	-0.13296	0.08822	-0.04197	0.01341	0.08858	0.08196	0.00694	-0.02872	-0.05188	0.21244	-0.03117	0.02136	-0.01180	0.0269	0.04628	-0.05018	-0.04917	-0.01860	-0.00482	0.04137	-0.06213	-0.01337	-0.02786	0.02605	0.05956	0.02337	0.0002	0.06293	-0.01888	-0.03524	0.05274	0.0022	0.02496	-0.01004	-0.02511	0.00734	0.00786	0.00212	-0.00592
C6HO	0.63358	0.32656	-0.29311	-0.12294	-0.33538	0.28371	0.16866	0.14704	0.15523	0.12223	0.13902	-0.03258	0.1084	0.01495	-0.07216	-0.00450	0.04185	-0.05986	0.06453	-0.13493	0.00426	0.05614	0.0524	0.09398	0.05336	0.0022	-0.00840	0.0885	0.02378	0.08295	0.01795	0.01016	-0.05620	0.00348	0.02482	-0.00386	0.03524	-0.01543	-0.02655	0.01623	0.00672	-0.03300	0.00791	0.035	0.00888	-0.01361	-0.01809	-0.00429	0.02601
C5NO	0.37084	0.51547	-0.61127	0.24936	-0.27593	0.10439	-0.10269	-0.05987	-0.07728	0.05155	-0.08960	-0.03079	0.01498	0.06963	-0.03780	0.07283	-0.07268	0.00371	-0.06633	0.02488	-0.01102	0.04541	0.00212	-0.00981	0.00809	-0.01819	0.03497	0.05543	0.05948	0.05374	-0.04815	0.00515	0.01033	0.00437	0.00545	0.00366	-0.00070	0.02189	0.0276	0.01678	-0.01009	0.02781	-0.00596	0.01631	0.01146	0.00278	-0.00931	0.00062	-0.01342
C8	-0.82092	0.07798	-0.09203	0.08879	0.27109	-0.20115	-0.17609	-0.18900	-0.11803	-0.04005	0.13035	0.16306	-0.01654	-0.00130	-0.06956	0.006	0.06323	-0.16344	0.03651	-0.04018	-0.02694	0.03894	0.03784	0.09004	0.02929	0.02938	-0.00059	0.00264	0.02932	-0.02418	-0.03535	0.0045	-0.02250	-0.00312	0.03354	0.00037	-0.00529	-0.04147	-0.01898	-0.01314	0.03913	-0.01961	0.00128	-0.01968	0.02069	-0.01025	0.0329	0.0019	-0.00628
C8H	0.2648	-0.55265	0.11948	0.05047	-0.10366	-0.18373	0.2826	-0.32370	-0.17340	-0.08718	0.29175	0.15086	-0.16402	0.05479	0.26697	0.08784	-0.25267	0.13399	0.00449	0.00144	0.1275	0.01202	0.096	-0.01059	0.08986	-0.02040	0.01923	0.01485	-0.05050	0.02634	-0.01144	0.0196	-0.02502	-0.02421	0.02878	0.01031	0.02997	-0.00894	-0.00082	0.01003	0.00403	0.00723	-0.00249	-0.00890	0.00981	0.00903	-0.00558	-0.00565	0.00464
C7N	0.79056	-0.12682	-0.23553	-0.24015	0.16949	-0.29533	0.14328	0.07368	-0.15744	-0.13351	-0.09810	0.01395	0.0944	-0.06151	0.00476	0.01233	-0.02962	0.00435	0.05399	-0.01024	-0.10676	-0.00119	-0.01984	0.01449	0.04006	-0.02278	-0.01764	0.01357	-0.03296	-0.03017	0.00678	-0.05567	0.01532	-0.00618	-0.06092	0.02766	0.01652	-0.03687	0.0191	-0.00109	0.04735	-0.00756	-0.05383	0.0285	-0.01545	0.03524	0.01254	-0.01306	0.01231
C7HN?	0.45831	0.05401	0.59952	0.38361	-0.26739	-0.34704	-0.06595	-0.06589	0.00249	-0.05206	0.02066	0.03047	0.03293	0.03274	0.03687	-0.08757	0.11728	-0.01694	-0.01569	0.04575	0.00259	0.0681	0.05153	-0.01113	0.02946	0.14739	-0.03669	0.01978	-0.01119	-0.00494	-0.05895	0.01347	-0.02910	-0.00771	-0.00945	-0.02485	-0.08355	0.04461	0.00324	0.00199	0.00558	0.00333	-0.00331	0.00621	0.03528	0.0059	-0.00347	-0.00625	0.01171
C3S2?	-0.59989	0.28103	0.22565	0.36069	0.32949	0.00472	0.16514	0.0755	-0.08787	0.15878	-0.08282	-0.24170	0.03102	0.22417	-0.04096	-0.14521	-0.16699	0.04636	-0.07819	-0.03241	0.05681	0.03849	0.00674	0.02711	0.03081	-0.02046	0.01551	0.02978	-0.00025	-0.07059	-0.07265	-0.00087	-0.00510	-0.00501	0.05288	0.00093	-0.06331	-0.02224	-0.00271	0.03529	0.00532	0.00458	-0.02326	0.02467	-0.02736	-0.00808	0.01044	0.00328	0.0009
C6HS	0.44992	0.00809	0.34848	-0.31165	0.22352	0.4744	-0.05353	-0.29453	0.05782	-0.12770	-0.05976	-0.15698	-0.07541	0.17171	-0.13878	0.23062	0.02977	-0.03381	0.02769	0.03213	0.07467	0.14473	0.03463	-0.05938	0.02969	-0.01710	0.04108	-0.05878	0.03775	-0.00551	0.06576	0.03723	-0.05175	-0.01587	-0.03734	-0.01440	-0.01982	-0.01256	-0.05680	-0.01716	0.0244	0.0233	-0.00008	0.01353	-0.00794	0.00633	0.00848	0.00713	0.00412
C5SN	0.60254	0.37367	0.2338	-0.32843	0.25672	0.21067	0.0388	-0.15213	-0.17460	-0.15166	0.12136	-0.11929	0.06307	0.08075	-0.04793	0.08665	0.09724	-0.01558	0.12822	0.13842	0.06417	-0.09223	0.12545	-0.03555	-0.00271	-0.00666	0.02738	0.00347	0.00081	-0.05857	-0.05379	-0.05660	0.02784	-0.03081	0.01782	-0.03699	0.00687	0.01444	0.06201	-0.02681	-0.03605	-0.03993	0.012	0.0085	-0.01276	-0.00564	-0.00554	-0.00944	0.00224
C9	0.70385	-0.44484	-0.02740	0.05288	0.1286	0.12208	-0.14741	0.02893	-0.26611	-0.00745	0.09152	-0.06732	0.16675	0.09285	0.2213	-0.05744	-0.03226	-0.14299	-0.00262	0.03909	0.08818	-0.09726	0.02229	-0.01496	-0.07889	0.01036	0.02747	0.00915	0.08384	-0.02296	-0.05673	0.03017	0.02444	0.06973	-0.06884	0.04743	0.02074	0.02724	-0.02883	0.02166	0.02785	-0.01598	0.00245	0.00996	0.00458	-0.01821	0.00059	0.01584	0.00673
C9H	0.65874	-0.48373	-0.01573	0.2662	0.22144	0.05783	-0.22696	0.10311	0.04427	0.10886	0.03877	-0.02607	0.0108	0.09468	0.09555	-0.04331	0.00033	-0.15600	-0.16297	0.00901	0.10202	0.05423	-0.15672	-0.03812	-0.00028	-0.00936	0.00354	-0.07360	-0.01065	0.03688	0.00789	-0.01605	-0.03558	0.00934	0.0558	-0.05182	0.04319	-0.02402	0.00819	0.01059	-0.02748	-0.03372	-0.00308	-0.00772	-0.01333	0.02129	0.00521	-0.00023	-0.00236
C8N	0.85731	-0.16372	0.11039	0.18207	0.13031	-0.14572	-0.10313	-0.00797	-0.20695	0.0675	-0.01439	0.05242	0.0568	0.01506	-0.09767	0.1253	0.00618	0.06173	0.03713	-0.12312	-0.04508	0.02665	-0.05565	0.01482	-0.04092	-0.11821	0.04058	0.05256	-0.03763	-0.05516	0.04988	0.0084	-0.02930	-0.02818	0.03291	-0.01811	0.01724	0.05384	0.03089	0.00022	0.02373	-0.00793	-0.02263	-0.00546	0.01762	-0.04435	0.00365	0.01258	-0.01706
C8HN	0.79748	0.0315	0.28103	0.13854	0.00889	-0.25829	-0.18439	0.17386	-0.16442	0.1509	0.00086	0.10723	0.08234	0.03885	-0.10603	0.07225	-0.04147	0.07844	-0.06935	0.05327	-0.04677	-0.04767	-0.02822	0.00607	-0.04066	0.03814	0.00696	0.00863	-0.03275	-0.06308	-0.01225	0.02311	-0.08287	0.03126	-0.01116	-0.08423	0.01497	-0.01446	-0.01250	-0.01236	0.02236	-0.01085	0.01833	3e-05	0.0001	0.01275	-0.00675	-0.02002	0.01055
C8H2N	0.79941	0.09892	0.13855	-0.04169	-0.04359	-0.32816	0.1545	0.13519	-0.09415	0.02494	0.16551	0.01805	0.13301	0.04353	0.07065	-0.01626	0.00089	-0.16741	0.19822	-0.11303	0.02466	0.04173	0.02192	-0.03950	-0.00818	-0.04255	-0.10074	-0.00853	0.00113	0.02388	0.09817	0.01401	-0.00735	0.0268	0.0173	-0.01513	-0.05316	0.02093	0.03604	0.02879	-0.01298	0.03001	0.01678	-0.00995	-0.03099	0.01074	0.00985	0.00363	-0.00008
C8HO	0.23723	0.44589	-0.33622	0.29418	-0.45600	0.37115	-0.05864	-0.16393	-0.16293	0.23159	-0.09110	0.14016	0.03984	0.08136	0.05583	0.01166	0.0209	0.03141	0.02976	-0.02907	0.0239	0.03022	0.03745	0.00929	-0.03693	0.0607	-0.02719	-0.09356	-0.09721	-0.07332	0.03801	0.03205	0.04245	0.04649	0.04523	0.03256	0.01613	-0.02437	0.02401	-0.02889	-0.01225	-0.00110	0.00382	0.04009	0.01245	0.006	0.01632	0.00825	-0.00108
C7NO	0.74257	0.3612	-0.13423	0.25427	-0.10013	-0.07939	-0.06822	-0.10393	0.05707	-0.16153	-0.07841	0.10679	0.19483	0.14605	0.05979	0.02214	0.01389	-0.04585	-0.13826	-0.00556	0.09157	-0.01388	-0.02260	0.03354	-0.06689	0.07895	0.10502	0.12243	-0.07918	0.03898	0.08462	-0.00197	0.04738	-0.05927	-0.02411	0.03107	-0.02403	0.00178	-0.02114	-0.02268	-0.00152	-0.00144	0.0018	-0.01989	-0.02148	-0.00036	0.00711	-0.00946	-0.00248
C6NS	0.41639	0.15956	-0.20360	0.44393	0.21468	-0.00830	-0.41638	-0.16340	0.14963	-0.25465	0.1229	-0.32846	0.00974	-0.19894	-0.02423	0.01012	-0.12160	0.08405	0.02695	-0.03918	-0.01906	-0.06804	0.02937	0.02556	-0.10086	0.0036	0.01997	-0.06368	-0.01985	0.11092	0.00365	0.0352	0.01563	0.01262	0.04037	-0.01090	-0.02608	-0.00560	0.03362	-0.00143	0.04634	-0.00399	0.0124	0.01075	0.00248	0.01147	0.00215	-0.00455	0.00179
C10H	-0.15281	-0.70235	0.06481	0.21619	0.0053	0.35737	0.32403	-0.04308	0.21847	0.11963	-0.06132	0.19437	0.13621	-0.05366	-0.17674	0.04993	-0.08892	0.01761	-0.04204	-0.02335	-0.04863	-0.06005	0.0598	-0.01281	-0.00999	0.04385	-0.02605	0.01687	0.02266	0.00261	-0.02150	0.09214	0.02042	-0.01043	-0.03342	-0.00831	-0.00860	-0.01584	0.03951	-0.00450	-0.00012	-0.01579	0.02306	-0.01023	-0.02254	0.00355	0.02035	0.003	0.0065
C9N	0.69098	-0.12910	-0.24374	-0.08706	0.29787	-0.24856	0.28312	0.14917	-0.02478	-0.14385	-0.17378	0.18321	0.02242	-0.06565	0.05302	0.05616	0.03846	0.00563	-0.10497	-0.00167	0.00946	-0.00793	0.14516	0.01404	-0.12352	0.06778	-0.01880	-0.09190	0.13062	0.02058	0.01804	0.01542	0.00718	-0.04401	0.06412	-0.02906	0.00795	-0.01283	-0.01067	0.00333	-0.01423	0.02056	-0.03193	0.01222	0.00184	-0.01736	-0.00110	-0.00040	0.00305
C11H	0.60051	-0.19860	0.16582	0.47884	0.2464	0.33878	-0.03523	0.01827	0.16517	0.05367	0.06847	0.22271	0.0399	-0.03260	0.00614	0.04906	0.00568	0.00312	0.01477	-0.06400	0.09817	0.03918	-0.03544	0.0489	-0.07076	-0.08807	-0.10155	0.00126	-0.01386	-0.00033	-0.08215	-0.13471	0.04717	-0.04530	-0.02648	-0.01124	-0.02354	-0.03046	-0.02049	-0.00862	0.01585	0.02644	0.02567	0.01599	0.00852	-0.00184	-0.01124	-0.00418	-0.00446
C10N/C6NSO	0.54207	-0.04551	-0.24712	0.47626	0.32698	-0.06319	-0.28321	0.04599	0.20681	-0.02652	0.08727	-0.08582	-0.14514	0.02504	0.09413	0.07337	0.05725	0.01382	-0.18956	-0.00666	-0.09137	-0.06632	0.11586	-0.04942	0.17134	-0.03660	-0.12592	0.05215	0.00122	-0.03037	0.07156	-0.00295	0.04904	0.02738	-0.01272	-0.01051	-0.00756	0.00857	-0.01636	-0.02099	-0.01625	-0.01032	-0.00532	0.01043	-0.00177	-0.01744	0.00776	0.00179	0.00532
C10HN	0.78599	0.10959	0.04062	0.14465	0.27103	-0.00205	-0.01392	0.08213	0.03136	0.15029	-0.23709	0.06023	-0.28595	0.06487	6e-05	0.09382	0.0624	-0.00856	-0.01425	-0.23302	-0.00690	-0.04597	0.0093	-0.04818	0.04412	0.03112	0.04925	-0.06486	0.00489	-0.00107	-0.05615	0.01648	-0.01383	-0.05018	-0.03206	0.04998	0.00189	0.05178	0.02782	0.03899	0.00801	-0.01972	0.02326	-0.00052	0.00104	0.02109	-0.00045	-0.00075	0.00211
C7H4O3	-0.50253	0.18313	-0.02421	0.02818	0.41015	-0.35354	0.08506	-0.26231	0.10795	0.3885	0.03411	-0.07642	0.27197	-0.03426	0.13121	0.11853	0.03442	0.06831	-0.06885	0.03775	-0.06582	0.08434	0.04591	0.11922	0.01002	-0.01030	0.07218	-0.09687	0.00421	0.01255	0.04114	-0.06494	-0.01410	0.03491	-0.05597	0.00355	0.0058	0.02221	0.01239	0.01681	-0.02291	0.01034	0.01623	-0.00108	0.00731	0.00151	8e-05	0.00051	0.00551
C12H	-0.36019	-0.02106	0.13366	0.1711	0.00382	0.43532	0.13275	0.47094	-0.28452	-0.43690	0.11085	0.05979	-0.13906	0.17526	0.05421	-0.05211	0.05029	0.01131	-0.05041	-0.06483	-0.11873	-0.01142	0.00886	0.0681	-0.01208	-0.01222	0.07539	-0.06321	-0.06061	0.0416	0.00946	-0.02370	-0.00707	0.03931	-0.03670	-0.03682	-0.00452	0.00619	0.01068	-0.00942	-0.01341	0.0276	0.00419	0.00193	0.00949	-0.00260	0.00745	0.00604	0.00784
C11N	0.65979	-0.06678	-0.28121	0.2024	0.31581	0.00813	0.32191	-0.12210	0.19013	-0.21954	0.04468	0.14591	0.11642	-0.04562	-0.10679	0.0182	-0.09189	-0.09013	-0.00032	0.11071	-0.10929	0.08692	-0.07604	-0.06799	0.04747	-0.05540	0.07365	0.01539	-0.03210	-0.03753	-0.03489	0.0567	0.06724	0.04037	0.01182	-0.03266	-0.01351	0.00371	0.00025	0.03053	-0.00596	0.00186	0.01131	0.00361	0.0211	0.00396	-0.01140	0.01575	0.00521
C11HO	0.29809	0.39806	0.45738	-0.07440	0.22633	0.12981	-0.26107	0.15496	0.27312	0.2303	-0.22000	0.08422	-0.12181	-0.16427	0.23303	-0.07944	-0.05911	-0.14317	0.16452	0.04818	0.01808	-0.05427	0.05283	0.07819	0.05385	-0.04073	0.10988	0.02369	-0.03327	-0.01220	-0.00452	0.05419	0.03093	-0.01946	0.00623	-0.04861	0.01142	-0.00883	-0.00836	-0.00811	-0.00204	0.0268	-0.01217	0.00426	0.00205	-0.00331	0.00645	-0.00554	0.00609
C10NO	0.08715	0.32015	0.39224	0.49388	0.14191	0.34291	-0.09248	0.22968	0.31382	-0.24596	0.00931	0.12309	0.11058	-0.11986	-0.05137	0.12011	-0.17008	0.04333	0.08067	0.03681	0.05105	-0.02937	-0.01195	0.00861	0.02882	0.07594	0.00357	0.0054	0.03093	-0.04378	0.02147	-0.06243	-0.09006	0.0577	0.0175	0.06928	0.00996	0.02347	0.00346	0.01634	-0.02678	-0.00197	-0.02142	-0.01052	0.00028	-0.00322	0.01275	-0.00441	-0.00263
C12N	0.41587	0.17439	-0.51029	0.38937	0.1574	0.256	0.06443	-0.07055	0.12438	0.02866	0.20496	0.05668	-0.25836	0.08514	0.11626	-0.14716	0.08137	0.11999	0.11064	0.16681	-0.04221	0.06607	-0.09652	0.08888	-0.07578	0.02808	-0.02934	0.00531	0.07237	-0.07255	0.07593	0.03925	-0.01202	-0.03979	-0.03197	-0.00410	-0.00475	0.00743	0.0112	0.03527	0.0115	-0.01649	-0.00069	-0.00099	-0.00556	0.00315	8e-05	-0.01101	-0.00456
C12HN	0.44753	0.20384	-0.08908	0.1878	0.53456	-0.19747	0.31181	-0.18265	0.10843	0.27561	0.06387	-0.01770	-0.21413	0.16584	-0.17508	-0.00194	0.03497	-0.01645	0.10075	0.03259	0.03387	-0.10014	-0.06726	-0.03066	-0.07404	0.05976	-0.03688	0.02053	-0.06534	0.10308	-0.03165	-0.00248	-0.00429	0.0587	-0.01382	0.0088	0.01864	0.00171	-0.00686	-0.03160	-0.01379	0.01967	-0.03554	-0.01024	0.00746	-0.01194	0.00265	0.00491	0.01104
C9H4O3	0.37889	0.49403	0.2678	0.04476	0.55104	0.01998	0.37053	0.11776	-0.06993	0.01503	-0.08644	-0.05671	0.05225	0.01358	0.04377	-0.16450	-0.02304	0.00419	-0.05058	-0.02512	-0.00717	-0.05244	0.07726	-0.01771	-0.01511	-0.05284	-0.00265	0.04487	0.01646	-0.00183	0.0592	0.03572	-0.05948	0.01453	-0.00940	0.03569	-0.00974	-0.05178	0.00181	-0.03645	-0.00091	-0.01179	0.02615	-0.00037	0.03092	0.02115	-0.01975	4e-05	-0.03017
C14H	0.68536	-0.17308	0.14279	0.12509	-0.01740	0.35996	0.18607	-0.22025	-0.24535	0.08549	0.14135	0.02788	-0.00216	-0.29994	-0.03969	-0.12240	0.16264	0.01791	-0.07324	-0.01614	-0.00219	0.0352	0.00768	0.00389	0.01978	-0.08012	0.05248	0.01234	0.00317	0.06361	-0.04054	0.01558	-0.02088	0.017	-0.00492	0.00562	-0.02666	0.03293	-0.02787	-0.00209	-0.03414	-0.01065	-0.02370	0.01111	-0.00875	0.00749	0.02863	-0.02369	-0.01333
C13N	0.73954	0.29675	-0.11744	0.15208	0.10883	0.24236	0.16521	-0.21334	-0.21983	-0.03932	-0.02942	-0.07956	-0.01883	-0.21976	-0.06069	-0.07428	0.15902	0.00676	-0.03026	-0.06939	0.03513	-0.04440	0.01102	-0.00894	0.06886	0.09554	0.02317	-0.01782	-0.03413	-0.07546	0.02321	-0.04543	0.02454	0.03376	0.04442	-0.00126	0.01736	-0.02486	-0.02649	0.04439	0.02786	0.02324	0.00777	-0.03831	-0.01318	-0.00230	-0.02087	0.00776	0.0068
[truncated: 5 more columns]

## Sheet: PCA - Lipids RAW
Theoretical m/Z					48.001	50.004	56.98	57.976	59.014	62.004	63.011	64.019	65.015	65.999	71.025	72.001	74.004	80.98	81.976	84.001	86.009	87.011	88.019	89.003	89.999	96.001	98.004	99.011	100.004	104.98	105.976	108.001	110.004	111.011	112.019	113.003	113.999	117.976	122.004	134.0036/133.9706	135.011	136.017	146.004	149.003	149.999	158.003	159.008	160.016	170.003
No.	Taxonomy	Abbr.	Stub No.	Category	C4	C3N	C2HS	CNS	C2H3O2	C4N	C4HN	C4H2N	C4HO	C3NO	C3H3O2	C6	C5N	C4HS	C3SN	C7	C6N	C6HN	C6H2N	C6HO	C5NO	C8	C7N	C7HN?	C3S2?	C6HS	C5SN	C9	C8N	C8HN	C8H2N	C8HO	C7NO	C6NS	C9N	C10N/C6NSO	C10HN	C7H4O3	C11N	C11HO?	C10NO?	C12N	C12HN	C9H4O3	C13N
1	Chicken	ChickPHEO200 (40)	N/A	200°C	144042	1776012	567330	2945166	146096	249572	318668	352861	410310	775511	89535	195833	737877	856488	1046284	128270	164625	228688	345724	384453	209136	83562	373163	154827	49186	217275	314482	106216	146913	176515	102842	230904	172704	61637	101142	77973	88607	54235	72349	179813	69874	40283	39548	111540	95203
2	Crow	CrowEU200 (46)	N/A	200°C	350177	1824901	191734	327347	194214	292284	245167	382970	215099	677063	128026	330847	341885	217171	263241	198582	237106	227707	326263	211843	272242	173780	537216	138789	16961	82819	118413	123418	163320	175422	130727	189982	150824	39507	264607	94631	124017	122009	90318	62557	23566	49021	61483	68543	51773
3	Chicken	CHIX200 (45)	N/A	200°C	529031	5628024	350410	2065189	254286	614215	565638	1109047	1394253	1881479	156229	525682	2560304	550810	771972	313412	469059	478803	781937	885843	773243	294107	1129235	282425	18696	148868	274734	209604	306615	325506	501991	447696	367757	146510	498816	63162	230330	261321	190112	181655	80215	111372	140001	150651	108621
4	Junco	JNCO200 (42)	N/A	200°C	282196	3477957	567728	2460483	236479	327820	368522	738559	949415	1321938	158700	303691	1492814	1825546	817169	221310	276963	315818	502860	590658	464369	166501	696078	184794	30468	187095	296616	170212	217815	269041	358418	307239	243805	110065	310547	62370	208073	189818	146814	195336	118868	91824	129444	128210	94973
5	Mallard	GRCA200 (44)	N/A	200°C	858351	6002199	1036134	2723799	216959	983510	831643	1366493	1720544	2091618	1136772	587191	2364870	1199398	1143194	406377	580492	724568	761206	811703	538784	281130	937899	422432	245223	369503	491279	236978	292106	354207	405185	413292	148711	116146	394249	33390	215840	201329	161164	189207	119464	88365	117214	120894	92272
6	Dumetella carolinensis	D200 (41)	N/A	200°C	380720	3526487	448252	1380943	156706	162552	350380	270600	732530	1081644	136896	295527	1567850	633744	624600	223380	303154	306778	437585	483288	377339	190057	718996	170959	17443	155922	263553	154047	191083	207657	288382	258726	193100	111727	314494	43800	136812	152541	123025	105343	50846	80818	98089	97316	76621
7	Pigeon	PIGG200 (43)	N/A	200°C	399848	3170819	371744	726379	233612	357583	378100	573182	694679	1042051	108164	296917	1454256	429925	429381	236086	283469	277900	385645	436575	349627	165524	649643	152244	17357	117714	179060	130899	174430	184517	253676	220922	161639	74896	280833	122134	138408	133911	104750	158928	46231	60333	78216	77306	56183
8	Turkey Feather	B200 (47)	N/A	200°C	301089	2604466	241725	418831	217808	381797	252470	431709	536039	888642	81579	265137	1261197	212281	304887	166586	237059	223818	329170	355927	304063	143528	599927	136052	22590	80378	155343	101072	152429	183618	234419	196023	142493	51501	269876	102082	114462	132091	101732	79798	33146	52486	70260	73609	52004
9	Chicken	ChickPHEO250 (48)	N/A	250°C	270542	2462555	892543	1877030	197043	93346	608453	781870	267977	845458	230240	242233	974173	1174197	898253	197493	279179	370644	463543	430706	259321	136368	354829	141088	236434	263631	313686	129391	158788	187351	228090	216108	78266	107895	153435	134863	239559	141832	90255	448174	114706	101146	113885	146916	67634
10	Crow	CrowEU250 (54)	N/A	250°C	481505	3786579	100637	447649	251278	372475	296079	500207	281618	611545	144876	646452	555304	322397	262856	276168	305475	287147	407202	147126	244791	206744	833059	179278	15344	84640	154810	113397	194802	203935	170502	229469	156227	29647	353619	110457	155359	158941	133708	87543	14270	65954	87626	94017	67397
11	House Wren	HOWR250 (49)	N/A	250°C	394789	2601961	487487	910034	170822	323118	319883	433862	460168	381203	90987	225603	1065293	485190	486356	167387	231922	229732	289654	304831	183207	136654	465397	118191	17293	163210	204596	109755	134582	142483	187127	155524	109127	55187	196782	23058	106455	91668	80386	60341	28963	53243	65133	58186	49401
12	Chicken	CHIX250 (53)	N/A	250°C	477456	4559678	170180	776275	146879	202487	423214	792712	928359	918394	170860	367575	1924893	427411	518090	217981	329865	334888	550884	594646	453918	192464	865907	168028	10352	92242	177048	138182	203784	236078	369306	315203	239288	50823	370767	146955	163928	198129	137626	106698	44234	62859	101921	110293	76850
13	Junco	JNCO250 (51)	N/A	250°C	377645	3829634	291200	991556	169848	351607	299677	569913	625595	643500	67412	240160	1502640	1028252	596110	200818	246889	254410	407889	420143	290196	169308	708583	123075	13121	122392	201042	125737	167386	187456	281811	245184	158152	49308	300333	108313	140829	150309	122696	62933	36036	66541	93567	92303	68254
14	Dumetella carolinensis	D250 (50)	N/A	250°C	297439	2756836	268871	610118	132863	328259	287629	480086	583180	521733	104420	212747	1155758	382662	386488	141104	208607	221251	322153	344264	212803	118612	500874	116398	17653	95027	154380	90529	129753	155959	206144	179861	125557	61492	218390	81745	107541	109299	81121	84866	31570	51660	64914	65433	49496
15	Pigeon	PIGG250 (52)	N/A	250°C	355407	2006869	303438	470667	220076	359449	359233	290045	521086	462767	248126	191016	812210	374280	308591	129709	181891	227164	236671	332891	169982	92663	338265	128348	31950	87822	122395	77734	102394	121138	141368	120451	59095	37273	136850	67842	95470	79284	51991	163901	41507	31065	44837	45578	31514
16	Turkey	B250 (55)	N/A	250°C	405287	3666611	95878	391864	181216	824841	316109	566014	659747	827790	197944	549861	1668459	288040	379989	216660	306622	336659	414890	461035	318660	239491	780183	191573	51052	73363	134035	118079	194182	228550	287723	24680	163139	36688	346270	24487	146161	160988	122774	139597	43656	66806	87441	86101	65232
17	Pipidae	BigFROG (9)	N/A	Fossil	618189	1832104	70162	55930	130788	298847	220234	280954	626139	779866	130552	402718	911137	155372	86594	265136	283244	229262	196501	265293	221809	241942	465272	123110	18974	52331	168630	163149	182419	165555	143948	140066	95545	98708	217484	101995	86430	70931	90078	26096	30023	53501	52100	40970	43434
18	Pipidae	SmallFROG (10)	N/A	Fossil	62243	90377	4651	4857	3596	20071	11816	12568	25773	34255	2266	31795	40737	6160	3995	17907	15828	9115	7316	11728	9117	17203	20674	5488	1117	6229	6305	10369	9707	6335	4983	7354	8726	6160	10436	8521	4856	3526	4260	2375	1944	3419	2875	1780	2539
19	Fur Feather	FurBIRD (6)	N/A	Fossil	185775	330734	47500	49881	23178	76353	41622	46191	118373	133200	17553	101823	164304	44079	43305	64703	53033	41474	32123	56161	49682	62899	77424	9080	10046	32092	25567	51941	31836	27261	21052	27040	29592	22207	33634	17599	11601	4723	16597	8997	6328	9320	5425	4245	3636
20	Messel Feather	MESSEL (4)	N/A	Fossil	22412	70833	3773	3741	12727	12431	12782	12987	22740	41423	7867	13353	30580	10675	6214	8901	10408	9068	7893	10938	8379	7368	15313	5388	3130	6818	7833	4359	6491	5865	5224	4375	3673	6341	7340	7574	6012	4300	2812	4284	3538	3019	2791	2462	2480
21	Hassianicterys	HANS (12)	N/A	Fossil	13571	22145	7194	7562	2231	4069	2763	1854	4354	4893	2518	7790	8959	6418	3338	4142	3031	2503	1330	2001	1087	3279	3947	1540	397	2727	1260	1528	1817	1362	329	809	474	619	1290	956	793	268	645	249	102	438	429	209	228
22	Palaeochiroptetryx	POLY (13)	N/A	Fossil	140331	269920	3331	7465	282	61057	33306	47276	61775	183339	810	42563	56849	32837	11692	26014	19608	16646	14662	19769	27658	19803	49762	909	353	602	1331	16465	11630	22874	7858	18461	8307	187	10228	93	461	401	4178	460	335	210	261	207	256
23	Pelobates	TADPOLE (11)	N/A	Fossil	711086	1523441	122491	107945	350767	510661	423278	349273	836718	1094300	374954	374166	614842	329822	152201	269669	339661	293800	214782	367678	277023	165586	301818	174927	48443	155465	152385	148419	210519	211381	142115	230317	141184	179788	134348	282411	169984	55238	132814	118331	55207	135753	129391	44598	62014
24	Keuppia	OCTOPUS (2)	N/A	Fossil	70298	216559	11629	6063	2407	21054	27603	22296	30070	111564	5948	21386	57322	23692	12871	41713	31246	15724	11696	32423	23531	43717	69589	12774	2433	10730	20297	23555	24839	6923	34922	17231	12284	25972	15903	11365	7736	6281	15301	1815	1733	8343	6941	7941	8600
25	Glyphiteuthis	SQUID (3)	N/A	Fossil	333593	990466	80483	79632	11399	143877	123068	90766	206427	504718	10747	190878	346381	163599	94075	140446	144978	119335	138622	143043	159667	166083	329562	54988	33965	73126	83785	85833	117963	101799	93170	98098	80362	52687	182580	84672	92423	79709	83364	23643	25910	38751	55508	52235	48848
26	Indeterminate Cephalopod	OLDSQUID (1)	N/A	Fossil	334043	1116796	78662	85259	20988	148096	122497	152261	118028	348643	18804	205788	553490	182375	93684	137944	141994	116848	138751	123046	152233	180163	326620	81567	41929	72101	102753	105447	116139	96749	65537	103264	90798	51558	189147	83940	91128	81899	90456	27337	24632	52645	53704	51614	47641
27	Messelornis	MESSELORNIS (5)	N/A	Fossil	27179	110323	5411	7256	171399	14894	15844	28387	38716	69147	75138	10618	27079	20339	11490	26516	22022	46834	15892	17900	14123	13128	27173	44099	2344	3622	7646	10086	14701	26886	18729	13954	5930	12745	12884	7016	6555	5320	4034	7135	5217	3515	4026	4113	5782
28	Palaeobatrachus Eye	MesselFROG (7)	N/A	Fossil	28967	74329	3238	2333	4456	12267	10212	9967	18070	29013	3766	16316	31967	4712	3527	10203	10114	7238	6093	8904	9015	8425	15303	4047	2095	3916	2840	4836	6208	5227	2946	4124	2829	6341	6808	3046	3871	2008	2243	986	705	2245	1967	1473	1069
29	Palaeobtrachus Skin	FROGnerve (8)	N/A	Fossil	242648	527343	24548	32393	36434	97385	367477	85375	140937	228705	29003	135015	240339	41500	30028	81660	81469	63426	47498	69501	67993	74817	120495	43773	22151	33521	44810	78217	54639	44829	39699	44439	50562	45798	69199	51882	32956	26404	29993	15773	15739	23884	16210	16872	18404
30	Cyclostome eye	LAMPREYeye (14)	N/A	Fossil	30672	84566	3418	2443	7884	21303	17077	15957	26619	38354	12188	22940	36001	8214	7085	14785	11911	9746	7339	10588	9208	14783	19566	6476	4873	2679	3661	8621	4452	4285	2780	5771	2668	6501	9722	8134	4202	2244	2974	2177	1898	3070	1824	1427	1685
31	Tullymonstrum	Tullymonster_1	N/A	Fossil	111134	177109	16362	4136	47809	9679	28940	4109	70634	62832	4385	9264	84843	38545	9927	29505	31215	30016	18108	36750	15774	25394	40408	17352	7882	5079	3495	16462	18410	17582	12157	13473	5017	1663	20600	15174	12314	6408	9230	1650	736	6568	6606	4734	5359
32	Tullymonstrum	Tullymonster_2	N/A	Fossil	466926	535026	44175	11887	101879	152056	92173	51792	196851	159251	71139	234312	263684	88022	40514	133630	109843	79623	52225	93595	48133	114396	148953	52949	5731	21866	15150	78354	71182	55235	38495	37591	15745	8132	76382	54640	40790	20514	33894	1935	1462	25918	25416	13320	18995
33	Yi qi	AR5_610_	814	Fossil	28405	55527.2	8783.7	15373.7	31580.8	98533.9	27234.2	17827.6	30938.1	59590.3	26872.6	19744.9	27900.8	8753.81	4140.61	15562.9	14475.9	13186.1	10343.9	21421.4	15786.3	18118	14746	11842	5832.06	8666.04	4336.11	3759.09	11384.1	8773.87	6671.23	28269.8	9744.31	7185.5	10764.3	7103.71	7104.71	7813.19	11477	5034.23	8660.66	3615.06	4137.57	3030.86	3225.15
34	Yi qi	AR5_611_	814	Fossil	41615.8	71011.2	15210.4	26282	59997.5	238097	36795	28234	42792.9	79740.5	47734.4	26843.8	35929.1	9593.61	4913.73	19316.1	20971.2	21696.5	14475.7	40879.6	21224.9	17528.2	16877.6	19220.1	7585.87	13181	5679.85	4920.16	13240.1	8978.24	8274.3	34877.3	12591.2	8251.44	12926.4	8398	8400	12348.3	12936.8	5826.1	21219.7	5671.57	5061.4	4095.24	3596.81
35	Sapeornis	AR5_710_	808	Fossil	94094.8	174357	175263	351960	613720	5.14358e+06	129199	200360	167452	267018	1.15172e+06	95030.4	103578	133324	76652.7	86571.6	267197	558843	88672.4	125629	55552	184004	77103.2	625243	91100.5	47405.5	27596.3	26284.4	49855	45700.1	141646	139706	153422	69798.6	42746.7	38369.9	38364.9	48784.8	41219.8	27326.9	40921.6	21751.4	31967.7	19966	21241.2
36	Chicken	ChickPHEO (24)	N/A	Unmatured	280650	3066899	525729	1445278	425927	355151	397490	515003	383300	1898954	743663	273037	790244	781367	1213482	388388	363714	443898	427482	409672	545679	368636	750888	443001	65290	248673	466324	212375	331876	425461	223859	376484	311949	695595	243740	248606	159586	187662	158494	177257	226716	72976	106994	107604	153301
37	Crow	CrowEU (31)	N/A	Unmatured	175141	1777389	210687	459902	285378	202636	214874	382263	543174	1299272	308840	206416	834412	310534	373149	199485	207904	228999	260281	302280	350276	127590	433473	195591	23142	90743	148361	152390	144321	179785	196378	198051	145108	166961	209553	200279	114861	113199	80695	82663	89176	61884	61475	64158	45325
38	House Wren	HOWR (25)	N/A	Unmatured	186981	1987012	564287	1374602	234048	273740	294302	586909	869375	1606330	1051800	423321	913938	1283725	1133470	428193	332210	349615	380006	448669	390953	390141	597305	500945	27502	167826	364348	175539	348842	505000	335561	580388	264883	147260	262285	100299	144114	138273	123494	200076	110514	132796	120887	114094	67848
39	Chicken	CHIX (30)	N/A	Unmatured	396712	3545021	351401	656414	50037	455006	485461	924918	1297587	2728727	623836	451205	1713151	628159	599560	356436	426469	453778	641035	743951	819733	229970	888877	349916	62573	120989	265414	217494	333426	437117	470962	521465	373972	282932	409068	361942	207484	233012	170961	75647	80270	101428	125886	145588	101892
40	Junco	JNCO (27)	N/A	Unmatured	173585	1526369	353132	699001	650181	204075	225185	451162	688306	1268582	1091412	443515	748128	1051879	501211	581689	344979	329122	269306	335503	260034	653121	576097	630963	99392	102870	161487	181728	330111	522399	301343	520872	217282	56018	230433	158416	197431	132643	87974	187341	90036	74012	72724	78704	80762
41	Mallard	GRCA (29)	N/A	Unmatured	434346	4478449	424873	758958	885239	499351	514742	953210	1288479	2927965	766873	484912	2186028	594612	594307	508422	543220	635383	669920	793845	807264	355996	1118153	465044	62160	187664	287387	315650	364245	454704	504678	563702	383934	347663	526287	459737	321219	182238	204928	248724	94977	154985	169465	151180	111820
42	Dumetella carolinensis	D (26)	N/A	Unmatured	152016	1210255	545575	810295	780083	313494	282402	412860	331280	961037	780496	314107	361113	627820	465106	385255	338751	265753	228700	208404	243827	205013	408819	453659	139968	117931	167318	178009	222798	327903	188522	156628	279291	312087	224520	237986	191439	140737	103753	394444	227296	46350	56196	112920	60413
43	Pigeon	PIGG (28)	N/A	Unmatured	200166	1746358	473328	726929	248335	348486	352781	543078	882672	1468608	717394	486829	915065	643468	524279	485522	373935	337255	324957	400221	403348	153753	524501	457773	81933	129382	203453	173724	276227	397451	281596	447260	242547	211605	235649	251379	195286	127746	96067	175822	103607	61485	80515	87231	54856
44	Turkey	B (32)	N/A	Unmatured	596078	6218045	631325	1376310	148719	960401	756795	1309666	1810570	4367675	651026	664333	3025468	771940	1109978	576843	680922	722860	948177	1075786	1190829	361322	1551325	558944	37168	256447	494491	297215	493903	631415	690298	693484	506405	365250	697927	588536	345639	362481	282668	147620	98764	197430	200146	225961	150808
45	Pigeon	PIDGprox (37)	N/A	Unmatured	19607	187041	20097	49934	11990	22379	23966	38896	28878	95935	24554	21560	87795	33298	40176	21989	22728	22030	14137	30506	34628	13187	33962	18957	7594	10532	12382	9294	17092	18547	13176	23024	18722	26242	23721	13010	12475	8692	5983	3729	5196	5257	6473	6892	6215
46	Pigeon	PIDGdistal (38)	N/A	Unmatured	166031	1515523	220708	279131	407840	210159	261790	350131	335005	1052465	294986	228823	774819	395600	369354	236792	254072	297698	162639	294883	350693	180265	439453	259656	206107	106146	132207	91632	185422	216634	125644	240427	152067	129482	12550	126983	121114	93023	60510	46165	51601	45794	69950	49512	56445
47	Frog Liver	FROGliver (35)	N/A	Unmatured	195581	1607305	239542	457533	270980	205450	194920	324576	311158	981187	155340	165366	502973	346943	323326	202282	206199	245880	258487	208566	356211	174098	439135	188020	150539	147396	233390	123739	162422	195053	143723	208927	153104	117283	189986	106002	123053	150047	121447	37356	44685	29887	75369	81092	70754
48	Frog Eye	FROGeye (33)	N/A	Unmatured	244816	1928671	175595	296410	2055156	298396	318369	581832	446012	1614236	2221973	194479	640168	685734	340204	345413	306115	1010177	392521	285969	470336	206150	729674	555335	445613	112142	170106	150170	541559	663500	416491	306195	244962	156770	299189	196111	276763	230873	94903	156589	125367	45312	135607	129071	60900
49	Frog Eye	FROGeye (34)	N/A	Unmatured	278994	2699409	326853	593865	2001505	402513	397224	855376	823099	1965563	1064087	271955	880161	613645	515291	501877	452908	743160	545649	509663	682000	734291	778547	1072147	653535	182472	300111	414621	475940	690235	704139	573540	477981	204155	409902	327816	255811	281552	194760	159464	185700	110346	155745	151522	88607
50	Magpie Feather	MAGfeather (39)	N/A	Unmatured	441508	3065346	382309	744941	425153	414896	373961	657364	516668	1792528	388693	375741	1035284	636703	634669	457550	443959	460206	484582	439237	599062	362003	968014	397710	325058	176294	285833	193375	316674	383158	395758	441933	269479	142920	475142	222863	214172	240161	191150	77437	90154	92896	121944	131480	102475
51	Eumelanin Standard	PUREMEL (36)	N/A	Unmatured	807355	5332415	135812	327806	466583	645020	607938	987138	1579260	3027018	772800	578734	2221014	295010	371916	1209245	835235	599069	593597	641061	793018	486590	1204756	588891	622500	208044	263324	590773	608205	871374	556302	601909	424176	1032761	562281	831096	468149	343845	397104	312557	395293	313186	302394	249325	158821
52	Wrinkled Hornbill - Black	AR8_220_	1031	SEM~190°C	62846.4	206273	4847.35	6992.66	5399.95	39984	25213.6	209220	49543.9	119493	6173.28	26617	106962	12220.3	15010.8	17846	23860.3	17068.3	33231.6	28202.6	50425.8	51330.4	46757.7	10723	13002.1	5574.32	9626.99	6672.75	12359.4	12344.1	10725.9	18055.5	17361.8	22573.6	22110	18966.1	8632.6	22934.2	15243.3	4578.44	6906.84	9381.22	7494.38	6097.25	5040.86
53	Common Pheasant -Reddish Brown	AR8_511_	1041	SEM~190°C	66292.1	125576	6341.12	8867.18	7530.34	32993.3	19651.2	215127	36308.6	74698.7	7631.69	21961.7	56105.9	14277.9	16864.9	12029.9	11472.4	11624.9	16212	14943.4	24600.2	51581.4	18691.7	6237.04	10373.7	5828.23	7467.98	5642.08	5702.58	4474.13	4787.58	5901.34	10355.1	9352.99	8782.11	5442.98	4844.76	17038.4	5870.61	2755.6	2430.44	4481.07	5366.6	3094.8	2078.6
54	Pigeon - Grey	AR8_720_	1035	SEM~190°C	13353.1	9762.14	788.41	1007.67	874.28	3116.06	1545.1	27724.3	2397.74	4546.36	491.16	3480.82	4371.45	1827.31	1599.68	1177.95	749.39	593.24	826.98	824.6	1203.97	9382.63	1491.46	502.18	562.72	563.21	600.24	399.11	523.19	301.07	295.06	209.05	353.09	626.27	764.47	510.17	510.17	349.09	221.04	341.08	200.12	218.05	236.04	138.07	159.03
55	Wrinkled Hornbill - Black	AR8_611_	1037	SEM~190°C	68810.8	263107	4222.89	7315.35	6976.29	48643.7	41588	191618	54951.4	148346	4666.21	33878	139930	12684.9	13219.1	26408.1	32551.8	20421	41458.8	33161.5	59419.9	49997.1	63225.6	13675.9	14255.7	5822.17	7921.28	7497.7	16422.9	16807.2	14010.2	22640.9	18818.9	28140.6	29617.2	25215.6	9944.8	30443	15189.5	5637.34	7834.76	10844.6	6695.77	7119.55	6081.69
56	Pigeon - Grey	AR5_110_	1042	SEM~190°C	62073.8	129695	8349.2	9002.16	13197.4	27142.6	30829.4	211357	35775.1	84088.5	10083.1	25301.5	62372.8	11703.6	13451.6	14372.5	14007.5	12065.5	17022	17017.7	27663.1	47413.8	25533.3	7615.19	9314.73	5990.08	5757.67	5973.38	11011.2	7427.94	6124.88	7545.55	8871.31	12864.2	12201.4	12456.2	12455.2	5239.68	4639.6	6632.37	3938.06	4325.95	4690.67	3091.9	3160.87
57	White-rumped mannikin -Black	AR4_510_	1077	SEM ~200°C	12702.9	145375	1551.01	2481.88	2655.41	19424	24973.2	53811.5	21812.5	350997	9456.24	6299.34	33897.8	5318.81	3750.68	8224.87	9879.4	7187.75	34732.7	39229.1	85105.9	25280.8	11562.4	4437.63	6177.7	4966.6	8503.18	6067.15	9368.44	6286.88	5517.59	176160	20859.6	14703.8	5536.88	9966.18	9964.17	4425.74	4422.14	5334.62	4522.48	10457.9	4482.04	2530.36	8613.69
58	Shrenck's Bittern - Reddish Brown	AR4_610_	1078	SEM ~200°C	30945.3	79375.4	3952	6956.19	10341.6	16774.7	19841.5	42157.3	12151.8	33612.5	2831.45	15498	36637.9	4673.56	6566.56	9650.02	6890.08	4677.82	6225	6204.08	10523.6	10716.6	12697.8	2749.18	6929.2	2984.97	2586.68	3794.8	5270.76	3283.08	2335.39	2896.51	2740.11	6656.67	5838.74	4625.15	4625.15	1639.02	2054.7	2590.53	1641.02	1515.89	1538.87	1505.91	1505.85
59	Shrenck's Bittern - Grey	AR4_710_	1079	SEM ~200°C	15847.2	23732.7	3154.23	2505.06	11530.2	10760.1	13630	26254	6778.3	13784.1	3375.23	6384.31	9013.5	2788.25	1800.48	3428.33	2316.45	3917.73	3048.66	3308.75	3617.05	5947.46	3153.68	1735.25	8202.09	1337.76	1275.61	950.39	1611.16	1028.48	896.33	1192.56	1202.54	1770.35	1735.22	1297.67	1296.67	875.27	923.32	1039.38	1350.72	696.18	702.16	1317.77	584.12
60	Pigeon-iridescent	AR4_810_	1080	SEM ~200°C	6965.25	13886.9	1102.51	1068.54	4845.48	4658.85	4945.23	14446.1	2944.89	9640.19	1086.51	2864.8	5925.71	1161.5	903.36	1796.42	1510.01	1413.8	1707.17	1870.52	2452.68	3831.49	2650.18	835.27	2794.8	607.14	753.18	493.1	1145.57	810.28	609.15	1361.77	857.26	1329.74	1471.85	1309.66	1308.66	640.12	673.16	804.21	612.16	554.11	593.11	616.2	460.07
61	Common Pheasant -Reddish Brown	AR8_321_	1026	SEM ~225°C	23431.2	38393.1	1431.4	1740.07	3635.66	9954.95	12595.4	69400.5	9167.58	22093.1	1234.05	6849.56	17675.1	3896.56	4032.22	3755.61	3950.63	3110.57	5537.03	4596.38	7059.72	23945.5	7913.41	1935.68	3272.39	1275.16	1676.95	1283.18	2867.64	1951.69	1993.78	2139.36	2181.3	3614.04	3816.03	4027.06	1576.77	11854.5	1894.53	1437.6	1427.49	1606.91	1440.44	1030.86	816.5
62	Turkey - iridescent	AR8_411_	1028	SEM ~225°C	14647	24085.5	1019.68	1186.92	2103.89	7520.66	6543.78	42065	7023.08	15029.9	1146.86	3158.5	12324.4	2787.07	2908.56	2519.19	3227.8	2786.07	4363.46	3617.65	5733.51	12300.6	5185.61	1466.45	3567.45	678.31	1409.33	669.31	1528.55	1072.77	1065.76	2169.16	2178.12	2415.87	2531.24	2161.07	1244.03	7021.27	1761.05	659.31	723.37	1351.22	1262.08	925.6	546.21
63	Wrinkled Hornbill - Black	AR8_711_	1030	SEM ~225°C	15300.8	11646.8	830.44	1022.65	707.61	2982.51	1332.93	31628.9	2667.36	5383.63	529.18	4112.27	5137.12	1850.28	1765.94	1440.3	897.53	728.34	859.11	908.71	1433.31	9942.66	1679.77	548.2	428.19	588.22	627.27	418.12	568.21	325.08	343.08	229.05	373.09	755.38	780.49	550.2	379.09	659.61	335.08	149.07	156.03	269.05	451.13	106.05	123.02
64	Pigeon - Grey	AR8_820_	1045	SEM ~225°C	62846	206273	4847	6993	5400	39984	25214	209220	49544	119493	6173	26617	106962	12220	15011	17846	23860	17068	33232	28203	50426	51330	46758	10723	13002	5574	9627	6673	12359	12344	10726	18056	17362	22574	22110	18966	8633	22934	15243	4578	6907	9381	7494	6097	5041
65	Common Pheasant -Reddish Brown	AR9_111_	1065	SEM ~250°C	16055.8	3321.69	1801.68	1216.77	4889.93	9266.6	8197.73	43647.6	3397.95	3149.12	877.4	3793.37	1638.39	2974.66	1831.81	1166.72	648.22	712.27	1729.37	1402.11	769.32	13628.5	1121.68	986.52	4751.86	870.41	1159.71	328.07	376.08	240.04	239.03	176.02	313.06	254.04	970.54	387.08	627.22	5106.29	458.12	938.92	401.1	272.05	1076.62	781.79	164.03
66	Wrinkled Hornbill - Black	AR9_211_	1058	SEM ~250°C	61500.6	79057.6	4643.58	4194.46	11993.1	25145.1	66854.6	173158	20913.3	43257.6	3123.29	21620.6	33593.4	9161.55	8590.84	10276.7	7961.42	5645.26	10281.9	9168.34	12929.6	52193	13659.2	3964.67	9192.27	3754.7	3854.29	2793.35	7169.87	3840.11	5002.72	2750.2	3537.88	8085.47	6606.43	7497.41	3225.74	39131.6	3003.99	3803.29	2818.45	2235.81	2718.09	2180.85	1560.41
67	Pigeon - Grey	AR9_321_	1061	SEM ~250°C	41169.7	16044.3	3557.43	2647.59	8396.54	14783.7	36215.6	121735	8489.71	12730.2	1989.05	9794.68	6689.78	6471.98	5483.49	2942.52	1828.79	1812.72	4052.49	3402.95	3169.18	41037.8	4094.6	1875.82	8595.67	1726.58	1906.95	990.54	1629.4	943.5	966.5	653.24	1056.6	1535.24	2464.33	1488.15	1378.01	26592.9	885.43	1748.68	886.45	697.27	1470.14	1453.17	495.15
68	Turkey - iridescent	AR9_410_	1056	SEM ~250°C	20364.2	14096.2	1885.07	1532.37	4679.56	10736.3	14378.5	62174.3	5705.82	9155.45	1736.77	4681.69	6486.39	3663.09	3517.29	2033.5	1722.75	2104.58	2841.8	2393.36	2859.78	18888.5	3052.46	1419.21	7041.81	1132.78	1524.39	773.37	871.46	691.3	663.27	809.4	1141.78	1104.75	1785.08	1097.71	1054.68	10821.8	751.34	1002.66	526.18	1150.79	1401.17	1135.84	389.11
69	Turkey - iridescent	AR9_510_	1057	SEM ~250°C	19852	12120.8	1560.43	1350.07	4762.71	8981.89	12059.6	49471.4	4373.12	7544.99	1195.84	4897.9	5797.47	2933.22	2588.94	1886.16	1494.34	1418.19	2279.08	1860.04	2211.86	16829.7	2782.54	1099.73	5370.67	852.45	1084.71	601.22	1137.79	764.35	820.41	580.21	731.33	1200.86	1576.57	1261.95	913.5	10737.8	659.27	906.52	541.18	827.41	1035.64	962.59	368.09
70	Common Pheasant -Reddish Brown	AR9_611_	1064	SEM ~250°C	17428.9	3573.83	1969.09	1512.23	9130.18	13152.7	16222.5	47702	3816.81	3487.55	951.49	3887.08	1784.72	3650.27	2078.38	1429.14	715.29	815.37	2423.17	1659.49	745.31	14064.7	1226.83	1117.69	11766.5	885.44	1366.03	311.06	473.13	342.07	299.05	277.05	420.1	340.07	1051.65	536.16	736.31	18877.2	549.17	1695.66	525.16	442.11	1363.01	1664.55	276.07
71	Wrinkled Hornbill - Black	AR9_720_	1059	SEM ~250°C	80073.7	72031.2	6909.16	5973.09	18969.8	34779	74063.9	242888	24507.4	42000.3	4607.88	24496.6	30460.7	13982.2	11744.5	9662.45	7648.05	6766.46	13330.6	10666.2	12544	73885.8	13589.7	5648.4	8623.09	5042.14	6305.63	3145.25	5982.47	3651.02	4125.86	2503.48	3580.71	6832.99	6698.57	6801.88	4207.27	18503.5	4036.53	5959.59	3516.75	2421.2	4609.24	2249.48	1639.5
72	Pigeon - Grey	AR9_820_	1060	SEM ~250°C	71035.8	25541.1	6759.42	5083.86	17417.5	26682.3	70650.1	251939	15701.4	23297.7	4138.16	17741	10991.6	12326.9	11065.5	4904.23	3079.31	3528.78	7684.8	6358.75	5446.02	76077.2	7182.8	3599.04	17278.8	3300.95	3901.35	1815.88	2752.2	1762.72	1631.48	1182.81	1872.96	2408.21	4409.6	2396.16	2549.61	54703.8	1608.5	3371.48	1597.51	1250.9	2991.91	2719.26	905.5
73	Wrinkled Hornbill - Black	AR5_510_	1053	SEM ~300°C	12729.6	4770.03	2354.34	2151.28	13121	8009.57	22836.3	42405.7	4217.11	8735.74	3017.15	3210.6	1519.08	2321.1	1698.3	1195.56	1005.41	1918.36	3182.08	2618.79	1731.3	8847.38	925.38	1572.99	5776.73	1060.47	1597	526.12	389.07	290.04	364.06	1943.74	785.21	381.05	1094.43	655.14	653.14	889.28	566.12	837.26	2167.93	797.25	526.09	1172.61	283.03
74	Common Pheasant -Reddish Brown	AR8_120_	1047	SEM ~300°C	95477.1	252272	6921.32	9386.85	6500.19	53665.3	35828.7	358200	67260.5	156439	11090.7	34577.9	126823	18573.7	24927.5	23426	29452.8	24706.4	39895.3	33923.9	59164.4	87164.5	52858.4	13460.1	15047.7	7301.85	11478	7312.16	13127.6	13159.6	12006.9	19748.1	21667	23741.7	23649.5	18445.2	10220.7	36120.4	14187.3	4672.6	6398.73	11173.6	9136.47	6406.34	4782.93
75	White-rumped mannikin -Black	AR4_110_	1073	SEM ~300°C	20599	7659.2	2485.62	1956.81	10663.1	8414.75	14656.9	77817.5	4325.58	15146.9	2496.8	4451.14	1825.53	3160.08	3420.46	1152.56	983.39	1718.19	2924.55	3633.63	2221.12	25219	1989.79	1324.72	6258.53	1053.43	1486.84	596.15	534.11	336.04	469.08	2276.26	696.17	528.11	1058.4	487.07	487.07	692.16	541.1	588.11	1204.59	572.11	497.08	1013.46	491.08
76	Shrenck's Bittern - Reddish Brown	AR4_210_	1074	SEM ~300°C	14478.5	126772	1627.16	3218.95	8633.41	21519.9	24077	60918	15316.8	277259	6331.87	4151.76	22056	11230.8	5204.59	4566.89	8545.14	5263.38	30353.1	32019.4	64595.7	21543	5723.51	3524.84	9292.13	3380.44	6295.26	3651.66	3124.83	3086.06	2762.89	78438.1	10972.5	8277.45	2464.12	4550.01	4545.01	2192.58	2865.04	3813.18	3153.25	5655.64	2292.48	2082.65	3429.17
77	Shrenck's Bittern - Grey	AR4_310_	1075	SEM ~300°C	1299.79	1677.38	246.02	223.02	1659.6	1514.34	981.64	2113.13	482.1	2990.34	279.03	364.06	354.06	289.03	196.01	282.03	286.03	352.05	479.1	530.12	586.15	656.19	147.01	202.01	1064.96	156.01	252.02	95	99	95	119	726.24	175.01	157.01	197.01	134	134	171.01	128	190.01	258.03	143.01	156.01	210.03	134
78	Pigeon-iridescent	AR5_310_	1051	SEM ~300°C	40807.3	6897.74	6995.16	6618.45	22708	15854.2	23674.2	176337	10888.9	12972.2	9130.51	9427.37	3107.5	7435.58	6775.33	2650.03	1872.44	4062.54	5873.4	5802.21	2539.77	39231.9	3387.12	3442.87	14344.5	2649.04	3493.09	1351.82	1263.65	851.33	948.39	866.28	1590.86	821.25	3158.47	1476.76	1475.76	1785.2	1571.94	1486.84	3588.09	1475.88	932.32	2423.55	646.16
79	Wrinkled Hornbill - Black	AR5_410_	1052	SEM ~300°C	18519.4	4341.04	3458	3600.38	14889	8008.83	30749.1	68181.8	5815.38	7538.02	5006.56	4747.12	1839.57	3453.97	2671.3	1413.79	1177.55	2005.54	4366.19	3225.03	1820.42	13453.6	1390.86	2039.67	4127.66	1515.97	2240.06	718.23	608.14	288.04	517.11	1081.5	1037.35	468.08	1369.61	809.22	809.22	1121.46	863.29	1157.5	3208.51	1061.47	614.12	1079.55	360.05
[truncated: 1 more columns]

## Sheet: PCA-Lipids Norm
Theoretical m/Z					48.001	50.004	56.98	57.976	59.014	62.004	63.011	64.019	65.015	65.999	71.025	72.001	74.004	80.98	81.976	84.001	86.009	87.011	88.019	89.003	89.999	96.001	98.004	99.011	100.004	104.98	105.976	108.001	110.004	111.011	112.019	113.003	113.999	117.976	122.004	134.0036/133.9706	135.011	136.017	146.004	149.003	149.999	158.003	159.008	160.016	170.003
No.	Taxonomy	Abbr.	Stub No.	Category	C4	C3N	C2HS	CNS	C2H3O2	C4N	C4HN	C4H2N	C4HO	C3NO	C3H3O2	C6	C5N	C4HS	C3SN	C7	C6N	C6HN	C6H2N	C6HO	C5NO	C8	C7N	C7HN?	C3S2?	C6HS	C5SN	C9	C8N	C8HN	C8H2N	C8HO	C7NO	C6NS	C9N	C10N/C6NSO	C10HN	C7H4O3	C11N	C11HO?	C10NO?	C12N	C12HN	C9H4O3	C13N
1	Chicken	ChickPHEO200 (40)	N/A	200°C	0.00948064	0.116895	0.0373409	0.193847	0.00961583	0.0164265	0.0209743	0.0232248	0.027006	0.051043	0.00589307	0.0128895	0.048566	0.0563728	0.0688649	0.00844255	0.0108354	0.0150519	0.0227551	0.0253042	0.013765	0.00549993	0.0245611	0.0101905	0.00323735	0.0143007	0.0206988	0.00699099	0.00966961	0.011618	0.00676892	0.0151978	0.0113671	0.00405686	0.00665702	0.00513207	0.00583199	0.00356967	0.00476191	0.011835	0.00459901	0.00265137	0.00260299	0.00734141	0.00626613
2	Crow	CrowEU200 (46)	N/A	200°C	0.0333198	0.173642	0.0182437	0.0311475	0.0184797	0.0278112	0.023328	0.0364401	0.020467	0.0644235	0.0121818	0.0314805	0.0325308	0.0206641	0.0250477	0.0188953	0.022561	0.0216666	0.0310444	0.0201571	0.0259042	0.0165354	0.0511168	0.013206	0.00161386	0.00788034	0.0112672	0.0117434	0.0155401	0.0166916	0.0124389	0.018077	0.0143511	0.00375914	0.0251777	0.00900427	0.0118004	0.0116093	0.00859388	0.00595238	0.00224234	0.00466441	0.00585019	0.00652196	0.00492627
3	Chicken	CHIX200 (45)	N/A	200°C	0.0181617	0.193211	0.0120296	0.0708984	0.00872969	0.0210861	0.0194185	0.0380738	0.047865	0.0645916	0.00536337	0.0180468	0.0878958	0.0189094	0.026502	0.0107595	0.0161029	0.0164374	0.0268441	0.0304112	0.0265456	0.0100968	0.0387669	0.00969571	0.000641838	0.00511067	0.00943168	0.00719575	0.0105262	0.0111747	0.0172335	0.0153695	0.0126252	0.00502972	0.0171245	0.00216836	0.00790728	0.0089712	0.00652658	0.00623625	0.0027538	0.00382342	0.00480626	0.00517188	0.00372898
4	Junco	JNCO200 (42)	N/A	200°C	0.012478	0.153787	0.0251036	0.108797	0.0104565	0.0144954	0.0162952	0.0326573	0.0419809	0.058453	0.00701734	0.0134285	0.0660087	0.0807213	0.0361333	0.0097858	0.0122466	0.0139647	0.0222353	0.0261175	0.0205333	0.00736228	0.0307789	0.00817115	0.00134722	0.0082729	0.0131157	0.00752637	0.00963126	0.0118964	0.0158484	0.0135854	0.0107805	0.00486681	0.0137316	0.00275785	0.00920049	0.0083933	0.00649177	0.00863729	0.00525606	0.00406024	0.00572371	0.00566914	0.00419948
5	Mallard	GRCA200 (44)	N/A	200°C	0.0248558	0.173809	0.0300039	0.0788746	0.00628261	0.0284801	0.0240824	0.0395703	0.0498228	0.0605682	0.0329182	0.0170036	0.0684809	0.0347317	0.0331041	0.0117677	0.0168096	0.0209817	0.0220427	0.0235049	0.0156019	0.00814084	0.0271593	0.0122326	0.00710106	0.0106999	0.0142262	0.00686231	0.00845868	0.010257	0.0117332	0.0119679	0.00430631	0.00336331	0.0114165	0.000966893	0.0062502	0.00583	0.00466692	0.00547898	0.00345939	0.00255884	0.00339423	0.0035008	0.00267197
6	Dumetella carolinensis	D200 (41)	N/A	200°C	0.0210548	0.195024	0.0247895	0.0763698	0.00866626	0.00898956	0.0193769	0.0149649	0.0405109	0.0598178	0.00757071	0.0163434	0.0867063	0.0350477	0.034542	0.0123535	0.0167652	0.0169656	0.0241996	0.0267271	0.0208679	0.0105107	0.0397624	0.00945449	0.000964644	0.0086229	0.0145752	0.00851921	0.0105674	0.011484	0.0159483	0.0143082	0.0106789	0.0061788	0.0173924	0.00242226	0.00756607	0.00843592	0.00680361	0.00582575	0.00281192	0.00446945	0.00542458	0.00538183	0.00423735
7	Pigeon	PIGG200 (43)	N/A	200°C	0.0244172	0.19363	0.022701	0.0443571	0.0142658	0.0218362	0.0230891	0.035002	0.0424213	0.063634	0.00660515	0.0181316	0.0888058	0.0262538	0.0262206	0.0144169	0.0173103	0.0169703	0.0235498	0.0266599	0.0213504	0.0101079	0.0396712	0.00929695	0.00105992	0.00718834	0.0109345	0.00799349	0.0106518	0.0112677	0.015491	0.0134908	0.00987066	0.00457361	0.0171494	0.00745825	0.00845204	0.00817742	0.00639667	0.00970511	0.00282315	0.0036843	0.00477635	0.00472078	0.00343088
8	Turkey Feather	B200 (47)	N/A	200°C	0.022643	0.195866	0.0181786	0.0314977	0.01638	0.0287126	0.0189867	0.0324662	0.0403122	0.0668293	0.00613505	0.0199393	0.0948468	0.0159643	0.0229287	0.0125279	0.0178277	0.016832	0.0247548	0.0267671	0.0228667	0.0107939	0.0451168	0.0102316	0.00169885	0.00604473	0.0116824	0.007601	0.0114632	0.0138088	0.0176292	0.0147417	0.010716	0.00387307	0.0202957	0.00767696	0.00860798	0.00993375	0.00765063	0.00600111	0.00249271	0.00394715	0.00528382	0.00553568	0.0039109
9	Chicken	ChickPHEO250 (48)	N/A	250°C	0.0149296	0.135894	0.0492543	0.103582	0.0108737	0.00515122	0.033577	0.0431469	0.0147881	0.0466559	0.0127056	0.0133674	0.053759	0.0647971	0.0495694	0.0108985	0.0154063	0.0204537	0.0255802	0.0237682	0.0143104	0.00752536	0.019581	0.00778583	0.0130474	0.0145483	0.0173105	0.00714034	0.00876259	0.0103388	0.012587	0.0119257	0.00431905	0.0059541	0.00846719	0.00744231	0.0132199	0.00782689	0.00498065	0.0247321	0.00632996	0.00558166	0.00628465	0.00810744	0.00373233
10	Crow	CrowEU250 (54)	N/A	250°C	0.0329119	0.258821	0.00687876	0.0305978	0.0171754	0.0254595	0.0202376	0.0341902	0.0192492	0.0418004	0.00990259	0.0441864	0.0379562	0.0220365	0.0179668	0.0188767	0.0208799	0.0196271	0.0278331	0.0100564	0.016732	0.0141314	0.0569414	0.012254	0.0010488	0.00578533	0.0105816	0.00775093	0.0133151	0.0139394	0.0116542	0.0156847	0.0106785	0.00202644	0.0241706	0.00754998	0.0106191	0.010864	0.00913923	0.00598376	0.000975386	0.0045081	0.00598943	0.00642627	0.00460673
11	House Wren	HOWR250 (49)	N/A	250°C	0.0302376	0.199289	0.0373375	0.0697011	0.0130836	0.0247482	0.0245004	0.0332303	0.0352451	0.029197	0.00696886	0.0172793	0.0815927	0.0371616	0.0372509	0.0128205	0.0177633	0.0175956	0.0221851	0.0233475	0.0140322	0.0104666	0.0356456	0.00905246	0.0013245	0.0125005	0.0156704	0.00840633	0.0103079	0.010913	0.0143324	0.0119119	0.00835823	0.00422687	0.0150719	0.00176605	0.00815358	0.00702102	0.00615691	0.00462162	0.00221833	0.00407798	0.00498865	0.00445657	0.00378371
12	Chicken	CHIX250 (53)	N/A	250°C	0.0240343	0.229526	0.00856656	0.0390763	0.00739363	0.0101928	0.0213039	0.0399037	0.046732	0.0462303	0.00860079	0.0185031	0.0968957	0.0215151	0.0260797	0.0109728	0.0166048	0.0168577	0.0277305	0.0299334	0.0228494	0.0096883	0.0435882	0.00845824	0.000521102	0.0046433	0.00891229	0.00695584	0.0102581	0.0118838	0.0185902	0.0158668	0.0120453	0.00255834	0.0186638	0.00739746	0.00825185	0.00997347	0.00692785	0.00537099	0.00222666	0.00316421	0.00513052	0.00555196	0.00386849
13	Junco	JNCO250 (51)	N/A	250°C	0.0219564	0.222656	0.0169305	0.0576494	0.00987502	0.0204425	0.0174233	0.0331349	0.0363723	0.0374133	0.00391936	0.013963	0.087364	0.0597829	0.034658	0.0116756	0.0143542	0.0147915	0.0237148	0.0244273	0.0168721	0.00984362	0.0411973	0.00715562	0.000762859	0.00711591	0.0116886	0.00731039	0.00973188	0.0108988	0.0163846	0.0142551	0.00919501	0.00286678	0.0174615	0.00629735	0.00818785	0.00873902	0.00713359	0.00365895	0.00209515	0.00386872	0.00544002	0.00536653	0.00396831
14	Dumetella carolinensis	D250 (50)	N/A	250°C	0.0231334	0.214414	0.0209115	0.0474521	0.0103335	0.0255305	0.0223704	0.0373389	0.045357	0.040578	0.0081213	0.0165465	0.0898895	0.0297617	0.0300592	0.0109744	0.0162245	0.0172079	0.0250556	0.0267753	0.0165508	0.00922509	0.0389556	0.00905289	0.00137297	0.00739076	0.012007	0.00704092	0.0100916	0.0121298	0.0160329	0.0139888	0.00976524	0.00478256	0.0169854	0.00635775	0.00836404	0.00850077	0.00630921	0.00660048	0.00245537	0.00401787	0.00504871	0.00508907	0.00384957
15	Pigeon	PIGG250 (52)	N/A	250°C	0.0328706	0.18561	0.0280641	0.0435307	0.0203542	0.0332444	0.0332245	0.0268255	0.0481938	0.0428	0.0229485	0.0176665	0.0751191	0.0346161	0.0285407	0.0119964	0.0168226	0.0210098	0.021889	0.0307882	0.0157212	0.00857014	0.0312852	0.0118706	0.00295497	0.00812241	0.01132	0.0071894	0.00947014	0.0112037	0.0130747	0.0111402	0.00546553	0.00344728	0.0126569	0.00627452	0.00882976	0.00733276	0.0048085	0.0151588	0.00383887	0.00287312	0.00414685	0.00421538	0.00291464
16	Turkey	B250 (55)	N/A	250°C	0.0240008	0.217134	0.00567781	0.0232059	0.0107315	0.0488464	0.0187197	0.0335189	0.0390697	0.049021	0.0117221	0.0325623	0.0988047	0.0170575	0.0225026	0.0128304	0.0181579	0.0199367	0.0245694	0.0273021	0.0188708	0.0141825	0.0462018	0.0113448	0.00302326	0.0043445	0.00793744	0.00699254	0.0114993	0.0135345	0.0170387	0.00146153	0.00966095	0.00217263	0.0205058	0.0014501	0.00865553	0.00953357	0.00727057	0.00826682	0.00258527	0.0039562	0.00517818	0.00509883	0.00386298
17	Pipidae	BigFROG (9)	N/A	Fossil	0.0565407	0.167568	0.00641715	0.00511546	0.0119621	0.0273331	0.020143	0.0256966	0.0572678	0.071328	0.0119405	0.0368333	0.0833343	0.0142106	0.00792005	0.0242498	0.025906	0.0209687	0.0179723	0.0242642	0.0202871	0.0221285	0.0425546	0.0112599	0.0017354	0.00478629	0.0154232	0.0149219	0.0166844	0.015142	0.0131657	0.0128107	0.00873872	0.00902801	0.0198915	0.00932865	0.00790505	0.00648748	0.0082387	0.00238679	0.00274596	0.0048933	0.00476516	0.00374719	0.00397255
18	Pipidae	SmallFROG (10)	N/A	Fossil	0.106699	0.154927	0.00797289	0.00832602	0.00616437	0.0344063	0.0202554	0.0215445	0.0441809	0.058721	0.00388445	0.054504	0.0698326	0.0105597	0.00684835	0.0306967	0.0271328	0.0156252	0.0125413	0.0201045	0.0156286	0.0294899	0.03544	0.0094077	0.0019148	0.0106779	0.0108082	0.0177749	0.01664	0.0108597	0.00854201	0.0126065	0.0149584	0.0105597	0.0178897	0.014607	0.00832431	0.00604438	0.00730262	0.0040713	0.00333246	0.00586096	0.00492841	0.00305133	0.00435243
19	Fur Feather	FurBIRD (6)	N/A	Fossil	0.0817964	0.145622	0.0209142	0.0219625	0.0102052	0.0336181	0.0183261	0.0203378	0.0521194	0.0586477	0.00772855	0.0448325	0.0723427	0.0194079	0.0190671	0.0284886	0.0233503	0.0182609	0.0141437	0.0247276	0.0218749	0.0276943	0.0340896	0.00399791	0.00442323	0.01413	0.0112571	0.0228695	0.0140173	0.012003	0.00926915	0.0119057	0.0130293	0.0097777	0.014809	0.0077488	0.0051079	0.00207953	0.00730763	0.00396136	0.00278621	0.00410358	0.00238862	0.00186907	0.00160092
20	Messel Feather	MESSEL (4)	N/A	Fossil	0.0477954	0.151057	0.00804623	0.00797799	0.0271414	0.0265101	0.0272587	0.0276959	0.0484949	0.088338	0.016777	0.0284764	0.0652144	0.0227653	0.0132519	0.0189821	0.0221959	0.0193383	0.0168325	0.0233262	0.0178689	0.0157129	0.0326562	0.0114904	0.00667498	0.0145399	0.0167045	0.00929593	0.0138426	0.0125076	0.0111406	0.00933005	0.00783298	0.0135227	0.0156532	0.0161522	0.0128211	0.00917011	0.00599682	0.00913598	0.00754508	0.00643827	0.00595204	0.00525042	0.00528881
21	Hassianicterys	HANS (12)	N/A	Fossil	0.0973194	0.158805	0.0515891	0.0542281	0.0159988	0.0291793	0.0198138	0.0132953	0.0312231	0.0350883	0.0180569	0.0558631	0.0642462	0.0460243	0.0239372	0.0297028	0.0217357	0.0179493	0.00953761	0.0143494	0.00779502	0.0235141	0.0283045	0.0110435	0.00284694	0.0195557	0.00903563	0.0109575	0.0130299	0.00976708	0.0023593	0.00580145	0.00339912	0.00443893	0.00925076	0.0068556	0.00568671	0.00192186	0.00462538	0.00178561	0.000731455	0.00314096	0.00307642	0.00149877	0.00163502
22	Palaeochiroptetryx	POLY (13)	N/A	Fossil	0.112012	0.21545	0.0026588	0.00595855	0.000225092	0.0487356	0.0265848	0.0377356	0.0493087	0.146341	0.00064654	0.0339737	0.0453768	0.0262104	0.00933253	0.0207643	0.0156511	0.0132868	0.0117032	0.0157796	0.0220766	0.0158067	0.0397199	0.000725562	0.000281764	0.000480515	0.0010624	0.0131423	0.00928304	0.018258	0.00627224	0.0147355	0.00663063	0.000149263	0.00816397	7.42324e-05	0.000367969	0.000320077	0.00333487	0.000367171	0.000267396	0.000167622	0.00020833	0.000165227	0.000204339
23	Pelobates	TADPOLE (11)	N/A	Fossil	0.0537846	0.115229	0.00926489	0.00816467	0.0265311	0.038625	0.0320156	0.0264181	0.0632871	0.0827699	0.0283605	0.0283009	0.046505	0.0249468	0.0115121	0.020397	0.025691	0.0222222	0.0162455	0.0278102	0.0209533	0.0125245	0.0228287	0.013231	0.0036641	0.0117589	0.011526	0.011226	0.0159231	0.0159883	0.0107492	0.0174206	0.0106788	0.0135987	0.0101617	0.0213608	0.0128571	0.00417805	0.0100457	0.00895023	0.00417571	0.010268	0.00978678	0.00337327	0.00469057
24	Keuppia	OCTOPUS (2)	N/A	Fossil	0.0588603	0.181324	0.00973692	0.00507653	0.00201537	0.0176284	0.0231119	0.0186684	0.0251775	0.0934122	0.00498024	0.0179064	0.0479955	0.0198372	0.0107768	0.0349262	0.0261622	0.0131657	0.00979302	0.0271477	0.0197024	0.0366041	0.0582666	0.0106956	0.00203714	0.00898419	0.0169946	0.0197225	0.0207976	0.0057966	0.0292401	0.0144275	0.0102854	0.0217463	0.0133155	0.00951588	0.00647733	0.00525906	0.0128115	0.00151969	0.00145103	0.00698557	0.00581168	0.00664897	0.00720075
25	Glyphiteuthis	SQUID (3)	N/A	Fossil	0.0524908	0.15585	0.012664	0.0125301	0.00179363	0.022639	0.0193647	0.014282	0.0324813	0.0794173	0.00169104	0.0300346	0.054503	0.0257423	0.0148027	0.0220992	0.0228123	0.0187773	0.0218122	0.0225078	0.0251236	0.0261331	0.0518565	0.00865235	0.00534439	0.0115064	0.0131836	0.0135058	0.0185615	0.0160181	0.0146603	0.0154357	0.012645	0.00829029	0.0287289	0.0133231	0.0145427	0.0125422	0.0131173	0.00372022	0.00407694	0.00609747	0.00873418	0.00821917	0.00768623
26	Indeterminate Cephalopod	OLDSQUID (1)	N/A	Fossil	0.0504673	0.168726	0.0118843	0.012881	0.00317087	0.0223744	0.0185069	0.0230036	0.0178317	0.0526731	0.00284091	0.0310905	0.0836214	0.0275533	0.0141538	0.0208406	0.0214525	0.0176534	0.0209625	0.0185898	0.0229994	0.0272191	0.0493458	0.0123232	0.00633464	0.010893	0.015524	0.015931	0.0175463	0.0146169	0.00990135	0.0156012	0.0137178	0.0077894	0.0285764	0.0126817	0.0137676	0.0123733	0.0136661	0.00413008	0.00372141	0.00795362	0.00811361	0.00779786	0.00719762
27	Messelornis	MESSELORNIS (5)	N/A	Fossil	0.0260548	0.10576	0.00518719	0.00695587	0.16431	0.0142779	0.0151887	0.0272128	0.0371146	0.0662869	0.0720301	0.0101788	0.0259589	0.0194977	0.0110147	0.0254192	0.0211111	0.0448968	0.0152347	0.0171596	0.0135388	0.012585	0.0260491	0.042275	0.00224705	0.00347219	0.00732974	0.00966882	0.0140929	0.0257739	0.0179543	0.0133768	0.00568472	0.0122178	0.0123511	0.0067258	0.00628387	0.00509995	0.00386714	0.00683988	0.00500121	0.00336961	0.00385948	0.00394288	0.00554284
28	Palaeobatrachus Eye	MesselFROG (7)	N/A	Fossil	0.0723696	0.185699	0.00808964	0.00582864	0.0111326	0.0306472	0.0255131	0.024901	0.0451451	0.0724845	0.00940877	0.040763	0.0798646	0.0117722	0.00881166	0.0254906	0.0252683	0.018083	0.0152224	0.0222453	0.0225226	0.0210486	0.0382322	0.0101108	0.00523403	0.00978352	0.0070953	0.012082	0.0155097	0.0130588	0.00736012	0.0103032	0.00706782	0.015842	0.0170087	0.00760996	0.00967109	0.00501668	0.00560379	0.00246337	0.00176133	0.00560878	0.00491424	0.00368006	0.00267073
29	Palaeobtrachus Skin	FROGnerve (8)	N/A	Fossil	0.0658342	0.143076	0.00666026	0.00878873	0.00988512	0.0264221	0.0997023	0.0231636	0.0382384	0.0620513	0.00786897	0.0366317	0.0652077	0.0112596	0.00814707	0.0221556	0.0221038	0.0172085	0.012887	0.0188567	0.0184476	0.020299	0.0326922	0.0118763	0.00600991	0.00909477	0.0121577	0.0212215	0.0148244	0.0121628	0.010771	0.012057	0.0137183	0.0124257	0.0187748	0.0140764	0.00894148	0.00716382	0.00813757	0.00427946	0.00427024	0.0064801	0.00439803	0.00457764	0.00499329
30	Cyclostome eye	LAMPREYeye (14)	N/A	Fossil	0.0584484	0.161148	0.00651332	0.00465536	0.0150237	0.0405948	0.0325418	0.0304075	0.050725	0.0730871	0.0232254	0.0437143	0.0686033	0.0156525	0.0135011	0.0281742	0.0226975	0.0185719	0.0139851	0.0201764	0.0175467	0.0281704	0.0372848	0.0123406	0.00928596	0.00510508	0.00697638	0.0164281	0.0084837	0.00816547	0.00529755	0.0109972	0.00508412	0.0123883	0.0185262	0.0155001	0.0080073	0.00427615	0.00566723	0.00414848	0.00361682	0.00585017	0.0034758	0.00271928	0.00321092
31	Tullymonstrum	Tullymonster_1	N/A	Fossil	0.099687	0.158867	0.0146767	0.00370999	0.0428846	0.00868205	0.0259591	0.00368577	0.0633586	0.0563602	0.00393334	0.00830979	0.076104	0.0345748	0.0089045	0.0264659	0.0279998	0.0269243	0.0162428	0.0329647	0.0141493	0.0227784	0.0362459	0.0155647	0.00707014	0.00455586	0.00313501	0.0147664	0.0165137	0.015771	0.0109048	0.0120853	0.00450024	0.00149171	0.0184782	0.0136111	0.0110456	0.00574797	0.0082793	0.00148005	0.000660191	0.00589149	0.00592557	0.00424639	0.00480702
32	Tullymonstrum	Tullymonster_2	N/A	Fossil	0.116621	0.13363	0.0110333	0.00296894	0.0254457	0.0379781	0.0230215	0.0129358	0.0491663	0.0397752	0.017768	0.0585227	0.0658587	0.0219847	0.0101189	0.033376	0.0274348	0.019887	0.0130439	0.0233767	0.0120219	0.028572	0.0372031	0.0132247	0.0014314	0.00546134	0.00378392	0.01957	0.0177787	0.0137957	0.00961466	0.00938888	0.00393253	0.00203108	0.0190775	0.0136471	0.0101879	0.00512366	0.0084655	0.000483293	0.000365155	0.00647338	0.006348	0.00332686	0.00474427
33	Yi qi	AR5_610_	814	Fossil	0.0372145	0.0727483	0.0115079	0.0201416	0.0413752	0.129093	0.0356806	0.0233566	0.0405332	0.0780716	0.0352068	0.0258686	0.0365539	0.0114687	0.00542477	0.0203896	0.0189654	0.0172756	0.013552	0.028065	0.0206822	0.0237371	0.0193193	0.0155147	0.0076408	0.0113537	0.0056809	0.00492493	0.0149148	0.011495	0.00874023	0.0370373	0.0127664	0.009414	0.0141027	0.00930684	0.00930815	0.0102364	0.0150364	0.00659554	0.0113467	0.00473623	0.00542079	0.00397084	0.00422539
34	Yi qi	AR5_611_	814	Fossil	0.0354165	0.0604329	0.0129446	0.0223669	0.0510599	0.202629	0.0313138	0.0240281	0.0364182	0.0678619	0.0406236	0.022845	0.0305769	0.00816449	0.00418175	0.0164386	0.0178472	0.0184645	0.0123193	0.0347899	0.0180631	0.0149171	0.0143634	0.016357	0.00645583	0.0112175	0.00483375	0.00418722	0.0112678	0.00764079	0.00704171	0.0296818	0.0107156	0.00702226	0.0110008	0.00714698	0.00714869	0.0105088	0.0110096	0.00495821	0.0180587	0.0048267	0.00430742	0.00348519	0.00306101
35	Sapeornis	AR5_710_	808	Fossil	0.00776917	0.0143962	0.014471	0.0290605	0.0506733	0.424693	0.0106676	0.0165432	0.0138261	0.022047	0.0950949	0.00784642	0.0085522	0.0110083	0.00632902	0.007148	0.0220618	0.0461422	0.00732146	0.0103729	0.00458679	0.0151927	0.00636622	0.0516247	0.00752194	0.00391415	0.00227856	0.00217024	0.0041164	0.00377334	0.0116953	0.0115352	0.0126677	0.0057631	0.00352948	0.00316811	0.00316769	0.00402804	0.00340342	0.00225631	0.00337879	0.00179596	0.00263949	0.00164854	0.00175383
36	Chicken	ChickPHEO (24)	N/A	Unmatured	0.0125076	0.136681	0.0234299	0.0644111	0.0189821	0.0158279	0.0177148	0.0229519	0.0170824	0.0846298	0.0331425	0.0121683	0.0352184	0.0348228	0.0540807	0.0173091	0.0162095	0.019783	0.0190514	0.0182577	0.024319	0.0164288	0.0334645	0.019743	0.00290975	0.0110825	0.0207825	0.00946482	0.0147906	0.0189613	0.00997662	0.0167786	0.0139025	0.0310003	0.0108627	0.0110795	0.0071122	0.00836345	0.00706353	0.00789973	0.0101039	0.00325229	0.00476835	0.00479554	0.0068321
37	Crow	CrowEU (31)	N/A	Unmatured	0.014058	0.142665	0.0169112	0.0369149	0.0229064	0.0162649	0.0172472	0.030683	0.0435988	0.104288	0.0247896	0.0165683	0.0669756	0.0249256	0.0299515	0.016012	0.0166878	0.018381	0.0208919	0.024263	0.0281155	0.0102412	0.0347935	0.0156995	0.00185753	0.00728365	0.0119085	0.0122319	0.0115842	0.0144308	0.0157626	0.0158969	0.0116474	0.0134014	0.0168201	0.0160758	0.00921952	0.00908612	0.00647713	0.00663509	0.00715787	0.00496723	0.0049344	0.00514976	0.00363809
38	House Wren	HOWR (25)	N/A	Unmatured	0.00888959	0.094468	0.0268277	0.0653523	0.0111273	0.0130143	0.0139919	0.0279033	0.0413325	0.0763693	0.0500055	0.0201258	0.0434511	0.0610318	0.0538883	0.0203575	0.0157942	0.0166217	0.0180665	0.021331	0.018587	0.0185484	0.0283975	0.0238163	0.00130752	0.00797891	0.0173221	0.0083456	0.0165849	0.0240091	0.0159535	0.0275932	0.0125933	0.00700114	0.0124697	0.00476849	0.00685157	0.00657388	0.00587124	0.00951216	0.00525414	0.00631349	0.0057473	0.00542434	0.00322568
39	Chicken	CHIX (30)	N/A	Unmatured	0.0159214	0.142274	0.0141029	0.0263441	0.00200816	0.018261	0.0194832	0.0371201	0.0520766	0.109513	0.0250367	0.0181084	0.0687546	0.0252102	0.0240624	0.014305	0.0171157	0.0182117	0.0257269	0.0298573	0.0328987	0.00922949	0.0356737	0.0140433	0.00251127	0.0048557	0.010652	0.00872878	0.0133815	0.017543	0.0189013	0.0209282	0.0150088	0.011355	0.0164173	0.014526	0.00832705	0.00935157	0.00686125	0.00303597	0.00322151	0.00407065	0.00505224	0.00584295	0.00408928
40	Junco	JNCO (27)	N/A	Unmatured	0.00967559	0.0850794	0.0196835	0.0389621	0.0362409	0.0113751	0.0125518	0.0251477	0.038366	0.0707105	0.060835	0.0247214	0.0417005	0.0586315	0.0279374	0.0324232	0.019229	0.0183452	0.0150111	0.0187009	0.0144942	0.0364048	0.0321115	0.0351697	0.00554009	0.00573395	0.00900125	0.0101295	0.0184003	0.0291184	0.0167968	0.0290333	0.0121112	0.00312243	0.0128443	0.00883007	0.0110048	0.00739349	0.00490365	0.0104423	0.00501859	0.00412541	0.00405362	0.00438694	0.00450165
41	Mallard	GRCA (29)	N/A	Unmatured	0.0145818	0.150349	0.0142637	0.0254796	0.029719	0.0167641	0.0172808	0.0320009	0.0432565	0.0982969	0.0257453	0.0162794	0.0733888	0.0199622	0.0199519	0.0170686	0.0182369	0.0213309	0.0224904	0.0266508	0.0271013	0.0119514	0.0375384	0.0156123	0.00208682	0.00630021	0.00964809	0.0105969	0.0122283	0.0152652	0.0169429	0.0189245	0.0128893	0.0116717	0.0176684	0.0154342	0.0107839	0.00611805	0.00687979	0.0083501	0.00318855	0.00520312	0.00568924	0.00507538	0.00375399
42	Dumetella carolinensis	D (26)	N/A	Unmatured	0.0101529	0.0808312	0.0364382	0.0541184	0.0521006	0.0209378	0.0188612	0.0275743	0.0221257	0.0641863	0.0521282	0.0209787	0.0241182	0.0419312	0.0310637	0.0257306	0.0226247	0.0177493	0.0152745	0.013919	0.0162848	0.0136925	0.0273044	0.0302992	0.00934826	0.00787644	0.0111749	0.011889	0.0148804	0.0219002	0.0125911	0.010461	0.0186534	0.0208438	0.0149954	0.0158947	0.0127859	0.00939962	0.00692951	0.0263443	0.0151808	0.00309565	0.00375325	0.00754176	0.0040349
43	Pigeon	PIGG (28)	N/A	Unmatured	0.0113384	0.0989222	0.0268116	0.0411768	0.0140669	0.0197399	0.0199832	0.0307626	0.0499988	0.083189	0.0406367	0.0275763	0.0518337	0.0364491	0.0296977	0.0275023	0.0211815	0.0191038	0.0184071	0.0226705	0.0228476	0.00870931	0.0297103	0.0259305	0.00464108	0.00732882	0.0115246	0.00984057	0.0156468	0.0225135	0.015951	0.025335	0.013739	0.0119863	0.0133483	0.0142393	0.0110619	0.00723615	0.0054417	0.00995941	0.0058688	0.00348281	0.00456076	0.00494119	0.00310731
44	Turkey	B (32)	N/A	Unmatured	0.0149658	0.156117	0.0158507	0.0345551	0.0037339	0.0241129	0.0190009	0.0328819	0.0454581	0.10966	0.0163454	0.0166795	0.0759607	0.0193812	0.0278683	0.0144828	0.017096	0.0181489	0.023806	0.0270099	0.0298982	0.00907174	0.0389493	0.0140335	0.00093318	0.00643864	0.0124152	0.0074622	0.0124005	0.015853	0.0173314	0.0174114	0.0127144	0.00917036	0.0175229	0.0147764	0.00867799	0.00910084	0.00709697	0.00370631	0.00247968	0.00495689	0.00502508	0.00567322	0.00378635
45	Pigeon	PIDGprox (37)	N/A	Unmatured	0.0167227	0.159526	0.0171406	0.0425884	0.0102262	0.0190869	0.0204405	0.0331742	0.0246299	0.0818224	0.020942	0.0183884	0.0748799	0.0283997	0.0342659	0.0187543	0.0193846	0.0187893	0.0120574	0.0260184	0.029534	0.0112471	0.028966	0.0161683	0.00647688	0.00898268	0.0105605	0.0079268	0.0145777	0.0158186	0.0112377	0.019637	0.0159679	0.0223817	0.0202315	0.0110962	0.0106399	0.00741336	0.00510287	0.00318044	0.00443164	0.00448367	0.00552079	0.00587815	0.00530074
46	Pigeon	PIDGdistal (38)	N/A	Unmatured	0.0142419	0.129999	0.018932	0.0239434	0.0349839	0.0180271	0.022456	0.0300337	0.0287362	0.0902789	0.0253035	0.0196281	0.0664628	0.033934	0.0316826	0.0203117	0.0217939	0.0255361	0.0139509	0.0252946	0.0300819	0.0154629	0.0376956	0.0222729	0.0176796	0.00910505	0.0113405	0.00786006	0.0159052	0.0185825	0.0107776	0.0206235	0.0130441	0.0111068	0.00107652	0.0108924	0.010389	0.00797937	0.00519046	0.00395997	0.00442626	0.00392814	0.00600021	0.00424707	0.00484177
47	Frog Liver	FROGliver (35)	N/A	Unmatured	0.0174217	0.143173	0.0213376	0.0407554	0.0241379	0.0183008	0.0173628	0.0289121	0.0277168	0.0874007	0.0138371	0.0147302	0.044803	0.0309045	0.0288007	0.0180186	0.0183675	0.0219021	0.0230251	0.0185783	0.03173	0.015508	0.0391166	0.0167482	0.0134095	0.0131295	0.0207896	0.0110222	0.014468	0.0173746	0.0128023	0.0186105	0.013638	0.0104472	0.0169233	0.00944228	0.0109611	0.0133657	0.0108181	0.00332754	0.00398038	0.00266223	0.0067136	0.00722339	0.00630252
48	Frog Eye	FROGeye (33)	N/A	Unmatured	0.0114927	0.0905397	0.00824315	0.0139147	0.0964774	0.0140079	0.0149455	0.0273136	0.0209376	0.0757788	0.104309	0.00912964	0.0300521	0.0321912	0.0159706	0.0162151	0.0143703	0.0474218	0.0184265	0.0134246	0.0220795	0.00967753	0.0342539	0.0260697	0.0209189	0.0052644	0.00798547	0.00704959	0.025423	0.0311474	0.0195518	0.014374	0.0114995	0.00735943	0.0140452	0.00920625	0.0129924	0.0108381	0.00445514	0.00735093	0.00588524	0.00212713	0.00636595	0.00605912	0.0028589
49	Frog Eye	FROGeye (34)	N/A	Unmatured	0.0104462	0.101072	0.0122381	0.0222357	0.074941	0.015071	0.014873	0.0320273	0.0308187	0.0735953	0.0398419	0.0101826	0.0329553	0.0229763	0.0192937	0.0187914	0.0169579	0.0278256	0.0204304	0.019083	0.0255357	0.0274936	0.0291506	0.0401437	0.0244699	0.00683218	0.0112369	0.0155244	0.0178203	0.025844	0.0263646	0.0214747	0.0178967	0.00764404	0.0153477	0.0122742	0.00957816	0.010542	0.00729227	0.0059707	0.00695304	0.00413161	0.00583146	0.00567334	0.00331765
50	Magpie Feather	MAGfeather (39)	N/A	Unmatured	0.0206424	0.143318	0.0178746	0.0348291	0.0198777	0.0193981	0.0174843	0.0307345	0.0241564	0.0838083	0.018173	0.0175675	0.0484039	0.0297686	0.0296735	0.0213924	0.020757	0.0215166	0.0226563	0.0205362	0.0280087	0.0169252	0.0452587	0.0185946	0.0151978	0.00824249	0.0133639	0.0090411	0.0148058	0.0179143	0.0185034	0.0206622	0.0125993	0.00668211	0.0222149	0.0104198	0.0100134	0.0112285	0.00893707	0.00362051	0.00421508	0.00434328	0.0057014	0.00614725	0.00479114
51	Eumelanin Standard	PUREMEL (36)	N/A	Unmatured	0.0229227	0.1514	0.00385603	0.0093072	0.0132474	0.0183137	0.0172608	0.0280272	0.044839	0.0859443	0.0219416	0.0164316	0.0630599	0.00837604	0.0105596	0.0343334	0.0237143	0.017009	0.0168536	0.0182013	0.0225157	0.0138155	0.0342059	0.01672	0.0176743	0.00590687	0.0074764	0.0167735	0.0172684	0.0247404	0.0157947	0.0170896	0.0120434	0.0293226	0.0159645	0.0235968	0.0132919	0.00976258	0.0112747	0.00887424	0.0112233	0.0088921	0.00858569	0.00707893	0.00450931
52	Wrinkled Hornbill - Black	AR8_220_	1031	SEM~190°C	0.0438895	0.144053	0.0033852	0.0048834	0.00377111	0.0279233	0.0176082	0.146111	0.0345995	0.0834489	0.00431118	0.0185883	0.0746982	0.00853419	0.010483	0.012463	0.0166631	0.0119199	0.0232077	0.0196956	0.0352154	0.0358471	0.0326538	0.00748849	0.00908013	0.00389289	0.00672311	0.00465999	0.00863133	0.00862064	0.00749057	0.0126093	0.0121248	0.0157645	0.0154407	0.0132452	0.00602867	0.0160163	0.0106453	0.0031974	0.00482347	0.00655148	0.00523378	0.00425808	0.00352034
53	Common Pheasant -Reddish Brown	AR8_511_	1041	SEM~190°C	0.0656557	0.124371	0.00628025	0.00878206	0.00745805	0.0326766	0.0194626	0.213062	0.03596	0.0739816	0.00755843	0.0217509	0.0555673	0.0141408	0.016703	0.0119145	0.0113622	0.0115133	0.0160564	0.0147999	0.0243641	0.0510862	0.0185122	0.00617717	0.0102742	0.00577228	0.00739629	0.00558792	0.00564784	0.00443118	0.00474162	0.00584469	0.0102557	0.0092632	0.0086978	0.00539073	0.00479825	0.0168748	0.00581425	0.00272915	0.00240711	0.00443805	0.00531508	0.00306509	0.00205865
54	Pigeon - Grey	AR8_720_	1035	SEM~190°C	0.131275	0.0959723	0.00775091	0.00990647	0.00859511	0.0306342	0.01519	0.27256	0.0235723	0.0446956	0.00482863	0.0342202	0.042976	0.0179644	0.0157266	0.0115805	0.0073673	0.00583218	0.0081301	0.0081067	0.0118363	0.0922413	0.0146626	0.00493697	0.00553214	0.00553696	0.005901	0.00392368	0.00514352	0.00295984	0.00290075	0.00205518	0.00347125	0.0061569	0.00751556	0.00501552	0.00501552	0.00343193	0.00217306	0.00335318	0.00196739	0.00214366	0.00232053	0.00135738	0.00156343
55	Wrinkled Hornbill - Black	AR8_611_	1037	SEM~190°C	0.040783	0.155939	0.00250284	0.00433569	0.00413473	0.0288304	0.0246485	0.113569	0.0325688	0.0879225	0.00276559	0.0200789	0.0829345	0.00751815	0.00783475	0.0156517	0.019293	0.0121032	0.024572	0.0196543	0.0352172	0.0296325	0.0374728	0.00810546	0.00844911	0.00345071	0.00469481	0.00444377	0.00973358	0.00996136	0.00830361	0.0134189	0.0111536	0.0166785	0.0175536	0.0149449	0.00589412	0.0180431	0.00900258	0.00334116	0.00464354	0.00642741	0.00396847	0.00421964	0.00360452
56	Pigeon - Grey	AR5_110_	1042	SEM~190°C	0.057967	0.121114	0.00779682	0.00840659	0.0123243	0.0253469	0.0287898	0.197374	0.0334082	0.0785253	0.00941605	0.0236276	0.0582463	0.0109293	0.0125617	0.0134217	0.0130808	0.0112672	0.0158959	0.0158918	0.0258329	0.044277	0.023844	0.00711138	0.00869848	0.00559378	0.00537675	0.00557819	0.0102827	0.00693651	0.00571966	0.00704634	0.00828439	0.0120131	0.0113942	0.0116321	0.0116311	0.00489303	0.00433265	0.00619358	0.00367752	0.00403975	0.00438034	0.00288734	0.00295175
57	White-rumped mannikin -Black	AR4_510_	1077	SEM ~200°C	0.0101703	0.116392	0.00124179	0.00198707	0.002126	0.0155514	0.0199943	0.0430831	0.0174637	0.281019	0.00757096	0.00504345	0.0271396	0.00425841	0.00300291	0.00658509	0.00790976	0.00575474	0.0278081	0.031408	0.0681384	0.0202406	0.0092572	0.0035529	0.00494606	0.00397641	0.00680791	0.00485755	0.00750067	0.00503347	0.00441755	0.141039	0.0167008	0.0117723	0.004433	0.00797923	0.00797763	0.00354339	0.0035405	0.00427106	0.00362084	0.00837292	0.00358846	0.00202589	0.00689639
58	Shrenck's Bittern - Reddish Brown	AR4_610_	1078	SEM ~200°C	0.0670961	0.172103	0.00856878	0.0150825	0.0224228	0.0363712	0.0430207	0.0914061	0.0263477	0.0728791	0.00613919	0.0336031	0.0794388	0.0101333	0.0142377	0.0209233	0.0149392	0.0101425	0.0134971	0.0134518	0.0228173	0.0232359	0.0275314	0.00596081	0.015024	0.00647206	0.00560848	0.00822794	0.0114281	0.00711842	0.00506363	0.00628025	0.00594115	0.0144331	0.0126596	0.0100283	0.0100283	0.00355375	0.00445503	0.00561682	0.00355808	0.00328677	0.0033366	0.00326514	0.00326501
59	Shrenck's Bittern - Grey	AR4_710_	1079	SEM ~200°C	0.0743662	0.11137	0.0148019	0.0117555	0.0541077	0.0504942	0.0639615	0.123202	0.0318086	0.0646845	0.015839	0.0299597	0.0422977	0.0130844	0.00844912	0.0160881	0.0108704	0.0183848	0.0143065	0.015527	0.0169738	0.0279097	0.0147993	0.00814302	0.03849	0.00627771	0.00598606	0.0044599	0.0075607	0.00482635	0.00420621	0.00559633	0.00564317	0.00830773	0.00814288	0.00608958	0.00608489	0.00410738	0.00433287	0.0048775	0.00633853	0.00326697	0.00329503	0.00618391	0.0027411
60	Pigeon-iridescent	AR4_810_	1080	SEM ~200°C	0.0609284	0.121475	0.00964418	0.00934703	0.0423857	0.0407532	0.0432583	0.126367	0.0257604	0.0843273	0.00950422	0.0250598	0.051835	0.0101602	0.00790212	0.0157141	0.0132088	0.0123672	0.0149334	0.0163623	0.0214548	0.0335159	0.0231824	0.0073065	0.0244474	0.00531094	0.00658842	0.00431338	0.0100208	0.00708791	0.00532853	0.0119121	0.00749886	0.0116319	0.012875	0.0114562	0.0114475	0.00559943	0.00588845	0.00703481	0.00535486	0.00484706	0.00518822	0.0053902	0.00402445
61	Common Pheasant -Reddish Brown	AR8_321_	1026	SEM ~225°C	0.0688101	0.112749	0.00420358	0.00511005	0.0106768	0.0292346	0.0369889	0.203808	0.0269223	0.0648807	0.00362402	0.020115	0.0519064	0.011443	0.0118414	0.0110291	0.0116018	0.00913478	0.0162605	0.0134981	0.0207322	0.0703204	0.0232392	0.00568449	0.00961	0.00374475	0.00492468	0.0037683	0.00842137	0.00573151	0.00585512	0.00628264	0.0064058	0.0106133	0.0112065	0.0118262	0.00463049	0.0348132	0.00556365	0.00422179	0.0041921	0.004719	0.00423013	0.00302732	0.00239781
62	Turkey - iridescent	AR8_411_	1028	SEM ~225°C	0.066069	0.108644	0.00459953	0.00535391	0.00949015	0.0339239	0.0295174	0.189745	0.0316794	0.0677961	0.00517321	0.0142472	0.0555922	0.0125718	0.0131198	0.0113635	0.0145598	0.0125673	0.0196825	0.0163184	0.0258625	0.0554851	0.023391	0.00661481	0.0160919	0.00305969	0.00635715	0.0030191	0.00689492	0.00483901	0.00480739	0.00978456	0.00982498	0.0108974	0.0114178	0.00974807	0.00561152	0.0316713	0.00794368	0.00297399	0.00326295	0.00609503	0.00569294	0.00417516	0.00246382
63	Wrinkled Hornbill - Black	AR8_711_	1030	SEM ~225°C	0.134275	0.102209	0.0072877	0.00897448	0.00620978	0.0261736	0.0116974	0.277566	0.023408	0.0472452	0.00464393	0.0360881	0.0450819	0.0162375	0.0154974	0.0126397	0.00787646	0.0063917	0.0075393	0.00797458	0.0125783	0.0872539	0.0147412	0.00481084	0.00375767	0.00516205	0.00550474	0.0036693	0.00498645	0.00285281	0.00301077	0.00201008	0.00327413	0.006629	0.00684935	0.0048284	0.00332678	0.00578855	0.00294056	0.0013082	0.00136927	0.0023611	0.00395899	0.000930664	0.00107959
64	Pigeon - Grey	AR8_820_	1045	SEM ~225°C	0.0438892	0.144053	0.00338496	0.00488364	0.00377115	0.0279233	0.0176085	0.146111	0.0345996	0.0834493	0.00431098	0.0185883	0.0746981	0.00853397	0.0104831	0.012463	0.0166629	0.0119196	0.0232079	0.0196959	0.0352156	0.0358469	0.032654	0.00748853	0.00908009	0.00389266	0.00672312	0.00466016	0.00863104	0.00862057	0.00749062	0.0126096	0.0121249	0.0157648	0.0154408	0.0132451	0.00602895	0.0160162	0.0106451	0.0031971	0.00482358	0.00655133	0.00523352	0.00425791	0.00352044
65	Common Pheasant -Reddish Brown	AR9_111_	1065	SEM ~250°C	0.108399	0.0224261	0.0121639	0.00821491	0.0330139	0.0625626	0.0553462	0.294683	0.022941	0.021261	0.00592369	0.0256106	0.0110614	0.0200832	0.0123673	0.00787701	0.0043764	0.00480883	0.0116757	0.00946622	0.005194	0.0920116	0.00757292	0.0066604	0.0320818	0.0058765	0.00782968	0.00221494	0.00253907	0.00162061	0.00161379	0.00118838	0.0021136	0.00171513	0.00655251	0.00261334	0.00423462	0.0344747	0.00309296	0.00633903	0.00270799	0.00183672	0.0072687	0.00527819	0.00110743
66	Wrinkled Hornbill - Black	AR9_211_	1058	SEM ~250°C	0.0752163	0.0966887	0.00567918	0.0051299	0.0146678	0.0307529	0.0817643	0.211775	0.0255774	0.0529048	0.00381984	0.0264424	0.0410853	0.0112047	0.0105067	0.0125685	0.00973695	0.00690425	0.0125749	0.011213	0.0158131	0.0638329	0.0167054	0.00484886	0.0112423	0.00459206	0.00471386	0.00341631	0.00876887	0.00469652	0.00611841	0.00336354	0.00432689	0.00988867	0.00807978	0.00916946	0.00394513	0.0478586	0.00367393	0.00465149	0.00344701	0.00273443	0.00332427	0.00266722	0.00190841
67	Pigeon - Grey	AR9_321_	1061	SEM ~250°C	0.0980278	0.0382026	0.00847048	0.00630409	0.0199927	0.035201	0.0862318	0.28986	0.0202146	0.0303115	0.00473606	0.0233218	0.0159288	0.0154102	0.0130566	0.00700634	0.00435447	0.00431621	0.00964925	0.00810266	0.00754603	0.0977137	0.00974952	0.00446645	0.0204669	0.0041111	0.00454058	0.00235854	0.00387971	0.00224654	0.0023013	0.00155541	0.00251584	0.00365551	0.00586774	0.00354339	0.00328114	0.0633195	0.00210827	0.00416373	0.0021107	0.00166025	0.0035005	0.0034601	0.00117899
68	Turkey - iridescent	AR9_410_	1056	SEM ~250°C	0.0852132	0.0589849	0.00788799	0.00641214	0.0195814	0.0449255	0.0601663	0.260166	0.0238758	0.0383106	0.00726744	0.0195903	0.027142	0.015328	0.0147179	0.00850909	0.00720877	0.00880652	0.0118914	0.0100149	0.0119666	0.0790383	0.0127729	0.00593862	0.0294661	0.00474007	0.00637874	0.00323613	0.00364659	0.00289271	0.00277542	0.0033869	0.00477773	0.00462278	0.00746959	0.00459332	0.00441326	0.0452831	0.00314395	0.00419559	0.00220178	0.00481543	0.00586314	0.00475287	0.00162821
69	Turkey - iridescent	AR9_510_	1057	SEM ~250°C	0.0971771	0.0593324	0.00763844	0.00660871	0.0233139	0.0439671	0.0590327	0.242167	0.0214068	0.0369334	0.00585374	0.0239756	0.0283791	0.0143584	0.0126731	0.00923291	0.00731492	0.00694216	0.0111563	0.00910505	0.0108272	0.082383	0.0136208	0.00538327	0.0262899	0.00417281	0.00530975	0.00294302	0.00556958	0.00374156	0.00401598	0.00284018	0.00357992	0.00587831	0.00771744	0.00617735	0.00447166	0.0525626	0.00322718	0.00443749	0.00264912	0.00405024	0.00506954	0.00471196	0.00180183
70	Common Pheasant -Reddish Brown	AR9_611_	1064	SEM ~250°C	0.0876959	0.0179822	0.00990775	0.007609	0.0459398	0.0661794	0.0816258	0.240019	0.0192048	0.0175481	0.00478755	0.0195584	0.00898007	0.0183668	0.0104577	0.00719092	0.00359908	0.00410265	0.0121925	0.00834995	0.00375013	0.0707687	0.00617297	0.00562381	0.059205	0.00445521	0.00687337	0.00156514	0.00238062	0.00172117	0.00150471	0.00139402	0.00211379	0.00171111	0.00529152	0.00269776	0.00370485	0.0949835	0.00276323	0.00853195	0.00264242	0.00222454	0.00685817	0.00837541	0.00138908
71	Wrinkled Hornbill - Black	AR9_720_	1059	SEM ~250°C	0.0841407	0.0756897	0.00726008	0.00627646	0.0199333	0.0365454	0.0778256	0.255224	0.0257521	0.0441335	0.00484191	0.0257408	0.0320078	0.0146924	0.012341	0.0101532	0.0080365	0.00711013	0.0140077	0.011208	0.0131811	0.0776384	0.0142799	0.00593528	0.00906106	0.00529823	0.00662589	0.003305	0.00628632	0.00383646	0.00433541	0.00263063	0.00376257	0.00718004	0.00703879	0.00714735	0.00442096	0.0194433	0.00424155	0.00626228	0.00369537	0.00254417	0.00484334	0.00236373	0.00172277
72	Pigeon - Grey	AR9_820_	1060	SEM ~250°C	0.0882823	0.0317421	0.00840051	0.00631815	0.0216462	0.0331604	0.087803	0.313106	0.0195135	0.0289541	0.00514285	0.0220482	0.0136602	0.0153197	0.0137521	0.00609491	0.00382692	0.00438552	0.00955056	0.00790257	0.00676824	0.0945478	0.00892669	0.00447284	0.0214739	0.00410238	0.00484854	0.00225675	0.0034204	0.00219068	0.00202758	0.00146998	0.00232769	0.00299289	0.00548019	0.00297791	0.00316862	0.0679851	0.00199902	0.00419003	0.00198536	0.0015546	0.0037183	0.00337946	0.00112534
73	Wrinkled Hornbill - Black	AR5_510_	1053	SEM ~300°C	0.0711747	0.0266706	0.0131638	0.0120284	0.0733632	0.0447837	0.127684	0.237102	0.023579	0.048844	0.0168697	0.0179514	0.0084936	0.0129779	0.00949567	0.00668471	0.00562153	0.0107261	0.0177919	0.0146424	0.00968018	0.0494682	0.00517406	0.00879503	0.0322993	0.00592938	0.00892927	0.00294168	0.0021754	0.00162169	0.00203556	0.010868	0.00439033	0.00213056	0.00611926	0.00366307	0.00365189	0.00497221	0.00316534	0.00468135	0.0121215	0.00445765	0.00294152	0.00655639	0.0015825
74	Common Pheasant -Reddish Brown	AR8_120_	1047	SEM ~300°C	0.0499415	0.131957	0.00362035	0.00491001	0.00340007	0.0280708	0.018741	0.187365	0.0351821	0.081829	0.00580126	0.0180867	0.0663374	0.00971541	0.0130389	0.0122535	0.015406	0.0129232	0.0208682	0.0177447	0.0309473	0.0455934	0.0276488	0.0070406	0.00787106	0.0038194	0.00600385	0.00382479	0.00686672	0.00688344	0.00628048	0.0103297	0.0113334	0.0124186	0.0123704	0.0096482	0.00534616	0.0188936	0.00742099	0.00244411	0.003347	0.00584459	0.00477904	0.00335098	0.00250182
75	White-rumped mannikin -Black	AR4_110_	1073	SEM ~300°C	0.0850799	0.0316348	0.0102664	0.00808221	0.0440419	0.0347554	0.0605374	0.32141	0.0178659	0.0625611	0.0103125	0.0183845	0.00753999	0.0130521	0.0141275	0.00476042	0.00406169	0.00709664	0.0120793	0.015008	0.00917389	0.104162	0.00821843	0.00547149	0.0258496	0.00435098	0.00614109	0.00246228	0.00220603	0.00138795	0.00193744	0.00940163	0.00287539	0.00218125	0.00437151	0.00201174	0.00201174	0.00285883	0.0022349	0.00242907	0.00497532	0.00236299	0.00205309	0.00418589	0.00202831
76	Shrenck's Bittern - Reddish Brown	AR4_210_	1074	SEM ~300°C	0.015317	0.134114	0.0017214	0.00340538	0.00913342	0.0227662	0.0254714	0.0644461	0.0162038	0.293316	0.00669858	0.00439221	0.0233334	0.0118812	0.00550601	0.00483138	0.00904003	0.00556821	0.032111	0.0338738	0.0683367	0.0227907	0.00605499	0.00372898	0.00983029	0.00357622	0.00665985	0.00386315	0.00330581	0.00326479	0.0029229	0.0829809	0.011608	0.00875684	0.00260683	0.00481352	0.00480824	0.00231956	0.00303097	0.00403402	0.00333587	0.00598319	0.00242525	0.00220327	0.00362777
77	Shrenck's Bittern - Grey	AR4_310_	1075	SEM ~300°C	0.0565505	0.0729784	0.0107037	0.00970302	0.0722049	0.065885	0.0427086	0.0919368	0.0209749	0.130102	0.0121399	0.0158393	0.0154042	0.0125749	0.00852788	0.0122704	0.0124444	0.0153168	0.0208444	0.0230641	0.0255019	0.0285491	0.00639602	0.00878893	0.0463336	0.00678759	0.0109647	0.0041332	0.00430723	0.0041332	0.00517738	0.0315968	0.00761423	0.0068311	0.00857139	0.00582999	0.00582999	0.0074402	0.00556895	0.00826684	0.0112262	0.00622199	0.00678759	0.00913786	0.00582999
78	Pigeon-iridescent	AR5_310_	1051	SEM ~300°C	0.0856051	0.01447	0.0146743	0.0138841	0.0476364	0.0332588	0.0496634	0.369917	0.0228426	0.027213	0.0191539	0.0197766	0.00651887	0.0155983	0.0142132	0.0055592	0.00392798	0.00852234	0.0123211	0.0121718	0.00532789	0.0823002	0.00710545	0.00722241	0.0300916	0.00555712	0.00732776	0.00283583	0.00265087	0.00178591	0.00198952	0.00181727	0.00333728	0.00172281	0.00662579	0.00309793	0.00309583	0.00374497	0.00329759	0.00311907	0.00752705	0.00309608	0.00195581	0.00508409	0.00135551
79	Wrinkled Hornbill - Black	AR5_410_	1052	SEM ~300°C	0.0775622	0.018181	0.0144827	0.015079	0.0623576	0.0335423	0.128782	0.285556	0.0243558	0.0315704	0.0209683	0.0198817	0.00770442	0.0144658	0.0111878	0.00592118	0.00493177	0.00839953	0.0182863	0.0135069	0.00762421	0.0563459	0.00582515	0.00854247	0.0172873	0.00634913	0.00938173	0.00300806	0.00254699	0.00120636	0.00216574	0.0045295	0.00434459	0.00196039	0.00573615	0.00338914	0.00338914	0.00469686	0.0036156	0.0048478	0.0134378	0.00444561	0.00257203	0.00452133	0.00150795
				AVERAGE	0.048914	0.128828	0.0139959	0.0264676	0.0236984	0.0364331	0.0326322	0.0915765	0.0337216	0.0707334	0.0172615	0.0230211	0.0529555	0.0231325	0.0192477	0.0162273	0.0161146	0.0163792	0.0180451	0.0201293	0.0206475	0.0314589	0.0285051	0.0122599	0.0103692	0.0071145	0.00955004	0.00818996	0.0108781	0.0112519	0.0102436	0.0153188	0.00931532	0.00859875	0.0132215	0.00865719	0.00776564	0.0130536	0.00634168	0.00575542	0.00448727	0.00442807	0.00484973	0.00465298	0.00357053

## Sheet: PCA-Lipids MeanCentred
Theoretical m/Z					48.001	50.004	56.98	57.976	59.014	62.004	63.011	64.019	65.015	65.999	71.025	72.001	74.004	80.98	81.976	84.001	86.009	87.011	88.019	89.003	89.999	96.001	98.004	99.011	100.004	104.98	105.976	108.001	110.004	111.011	112.019	113.003	113.999	117.976	122.004	134.0036/133.9706	135.011	136.017	146.004	149.003	149.999	158.003	159.008	160.016	170.003
No.	Taxonomy	Abbr.	Stub No.	Category	C4	C3N	C2HS	CNS	C2H3O2	C4N	C4HN	C4H2N	C4HO	C3NO	C3H3O2	C6	C5N	C4HS	C3SN	C7	C6N	C6HN	C6H2N	C6HO	C5NO	C8	C7N	C7HN?	C3S2?	C6HS	C5SN	C9	C8N	C8HN	C8H2N	C8HO	C7NO	C6NS	C9N	C10N/C6NSO	C10HN	C7H4O3	C11N	C11HO?	C10NO?	C12N	C12HN	C9H4O3	C13N
1	Chicken	ChickPHEO200 (40)	N/A	200°C	-0.00948064	-0.116895	-0.0373409	-0.193847	-0.00961583	-0.0164265	-0.0209743	-0.0232248	-0.027006	-0.051043	-0.00589307	-0.0128895	-0.048566	-0.0563728	-0.0688649	-0.00844255	-0.0108354	-0.0150519	-0.0227551	-0.0253042	-0.013765	-0.00549993	-0.0245611	-0.0101905	-0.00323735	-0.0143007	-0.0206988	-0.00699099	-0.00966961	-0.011618	-0.00676892	-0.0151978	-0.0113671	-0.00405686	-0.00665702	-0.00513207	-0.00583199	-0.00356967	-0.00476191	-0.011835	-0.00459901	-0.00265137	-0.00260299	-0.00734141	-0.00626613
2	Crow	CrowEU200 (46)	N/A	200°C	-0.0333198	-0.173642	-0.0182437	-0.0311475	-0.0184797	-0.0278112	-0.023328	-0.0364401	-0.020467	-0.0644235	-0.0121818	-0.0314805	-0.0325308	-0.0206641	-0.0250477	-0.0188953	-0.022561	-0.0216666	-0.0310444	-0.0201571	-0.0259042	-0.0165354	-0.0511168	-0.013206	-0.00161386	-0.00788034	-0.0112672	-0.0117434	-0.0155401	-0.0166916	-0.0124389	-0.018077	-0.0143511	-0.00375914	-0.0251777	-0.00900427	-0.0118004	-0.0116093	-0.00859388	-0.00595238	-0.00224234	-0.00466441	-0.00585019	-0.00652196	-0.00492627
3	Chicken	CHIX200 (45)	N/A	200°C	-0.0181617	-0.193211	-0.0120296	-0.0708984	-0.00872969	-0.0210861	-0.0194185	-0.0380738	-0.047865	-0.0645916	-0.00536337	-0.0180468	-0.0878958	-0.0189094	-0.026502	-0.0107595	-0.0161029	-0.0164374	-0.0268441	-0.0304112	-0.0265456	-0.0100968	-0.0387669	-0.00969571	-0.000641838	-0.00511067	-0.00943168	-0.00719575	-0.0105262	-0.0111747	-0.0172335	-0.0153695	-0.0126252	-0.00502972	-0.0171245	-0.00216836	-0.00790728	-0.0089712	-0.00652658	-0.00623625	-0.0027538	-0.00382342	-0.00480626	-0.00517188	-0.00372898
4	Junco	JNCO200 (42)	N/A	200°C	-0.012478	-0.153787	-0.0251036	-0.108797	-0.0104565	-0.0144954	-0.0162952	-0.0326573	-0.0419809	-0.058453	-0.00701734	-0.0134285	-0.0660087	-0.0807213	-0.0361333	-0.0097858	-0.0122466	-0.0139647	-0.0222353	-0.0261175	-0.0205333	-0.00736228	-0.0307789	-0.00817115	-0.00134722	-0.0082729	-0.0131157	-0.00752637	-0.00963126	-0.0118964	-0.0158484	-0.0135854	-0.0107805	-0.00486681	-0.0137316	-0.00275785	-0.00920049	-0.0083933	-0.00649177	-0.00863729	-0.00525606	-0.00406024	-0.00572371	-0.00566914	-0.00419948
5	Mallard	GRCA200 (44)	N/A	200°C	-0.0248558	-0.173809	-0.0300039	-0.0788746	-0.00628261	-0.0284801	-0.0240824	-0.0395703	-0.0498228	-0.0605682	-0.0329182	-0.0170036	-0.0684809	-0.0347317	-0.0331041	-0.0117677	-0.0168096	-0.0209817	-0.0220427	-0.0235049	-0.0156019	-0.00814084	-0.0271593	-0.0122326	-0.00710106	-0.0106999	-0.0142262	-0.00686231	-0.00845868	-0.010257	-0.0117332	-0.0119679	-0.00430631	-0.00336331	-0.0114165	-0.000966893	-0.0062502	-0.00583	-0.00466692	-0.00547898	-0.00345939	-0.00255884	-0.00339423	-0.0035008	-0.00267197
6	Dumetella carolinensis	D200 (41)	N/A	200°C	-0.0210548	-0.195024	-0.0247895	-0.0763698	-0.00866626	-0.00898956	-0.0193769	-0.0149649	-0.0405109	-0.0598178	-0.00757071	-0.0163434	-0.0867063	-0.0350477	-0.034542	-0.0123535	-0.0167652	-0.0169656	-0.0241996	-0.0267271	-0.0208679	-0.0105107	-0.0397624	-0.00945449	-0.000964644	-0.0086229	-0.0145752	-0.00851921	-0.0105674	-0.011484	-0.0159483	-0.0143082	-0.0106789	-0.0061788	-0.0173924	-0.00242226	-0.00756607	-0.00843592	-0.00680361	-0.00582575	-0.00281192	-0.00446945	-0.00542458	-0.00538183	-0.00423735
7	Pigeon	PIGG200 (43)	N/A	200°C	-0.0244172	-0.19363	-0.022701	-0.0443571	-0.0142658	-0.0218362	-0.0230891	-0.035002	-0.0424213	-0.063634	-0.00660515	-0.0181316	-0.0888058	-0.0262538	-0.0262206	-0.0144169	-0.0173103	-0.0169703	-0.0235498	-0.0266599	-0.0213504	-0.0101079	-0.0396712	-0.00929695	-0.00105992	-0.00718834	-0.0109345	-0.00799349	-0.0106518	-0.0112677	-0.015491	-0.0134908	-0.00987066	-0.00457361	-0.0171494	-0.00745825	-0.00845204	-0.00817742	-0.00639667	-0.00970511	-0.00282315	-0.0036843	-0.00477635	-0.00472078	-0.00343088
8	Turkey Feather	B200 (47)	N/A	200°C	-0.022643	-0.195866	-0.0181786	-0.0314977	-0.01638	-0.0287126	-0.0189867	-0.0324662	-0.0403122	-0.0668293	-0.00613505	-0.0199393	-0.0948468	-0.0159643	-0.0229287	-0.0125279	-0.0178277	-0.016832	-0.0247548	-0.0267671	-0.0228667	-0.0107939	-0.0451168	-0.0102316	-0.00169885	-0.00604473	-0.0116824	-0.007601	-0.0114632	-0.0138088	-0.0176292	-0.0147417	-0.010716	-0.00387307	-0.0202957	-0.00767696	-0.00860798	-0.00993375	-0.00765063	-0.00600111	-0.00249271	-0.00394715	-0.00528382	-0.00553568	-0.0039109
9	Chicken	ChickPHEO250 (48)	N/A	250°C	-0.0149296	-0.135894	-0.0492543	-0.103582	-0.0108737	-0.00515122	-0.033577	-0.0431469	-0.0147881	-0.0466559	-0.0127056	-0.0133674	-0.053759	-0.0647971	-0.0495694	-0.0108985	-0.0154063	-0.0204537	-0.0255802	-0.0237682	-0.0143104	-0.00752536	-0.019581	-0.00778583	-0.0130474	-0.0145483	-0.0173105	-0.00714034	-0.00876259	-0.0103388	-0.012587	-0.0119257	-0.00431905	-0.0059541	-0.00846719	-0.00744231	-0.0132199	-0.00782689	-0.00498065	-0.0247321	-0.00632996	-0.00558166	-0.00628465	-0.00810744	-0.00373233
10	Crow	CrowEU250 (54)	N/A	250°C	-0.0329119	-0.258821	-0.00687876	-0.0305978	-0.0171754	-0.0254595	-0.0202376	-0.0341902	-0.0192492	-0.0418004	-0.00990259	-0.0441864	-0.0379562	-0.0220365	-0.0179668	-0.0188767	-0.0208799	-0.0196271	-0.0278331	-0.0100564	-0.016732	-0.0141314	-0.0569414	-0.012254	-0.0010488	-0.00578533	-0.0105816	-0.00775093	-0.0133151	-0.0139394	-0.0116542	-0.0156847	-0.0106785	-0.00202644	-0.0241706	-0.00754998	-0.0106191	-0.010864	-0.00913923	-0.00598376	-0.000975386	-0.0045081	-0.00598943	-0.00642627	-0.00460673
11	House Wren	HOWR250 (49)	N/A	250°C	-0.0302376	-0.199289	-0.0373375	-0.0697011	-0.0130836	-0.0247482	-0.0245004	-0.0332303	-0.0352451	-0.029197	-0.00696886	-0.0172793	-0.0815927	-0.0371616	-0.0372509	-0.0128205	-0.0177633	-0.0175956	-0.0221851	-0.0233475	-0.0140322	-0.0104666	-0.0356456	-0.00905246	-0.0013245	-0.0125005	-0.0156704	-0.00840633	-0.0103079	-0.010913	-0.0143324	-0.0119119	-0.00835823	-0.00422687	-0.0150719	-0.00176605	-0.00815358	-0.00702102	-0.00615691	-0.00462162	-0.00221833	-0.00407798	-0.00498865	-0.00445657	-0.00378371
12	Chicken	CHIX250 (53)	N/A	250°C	-0.0240343	-0.229526	-0.00856656	-0.0390763	-0.00739363	-0.0101928	-0.0213039	-0.0399037	-0.046732	-0.0462303	-0.00860079	-0.0185031	-0.0968957	-0.0215151	-0.0260797	-0.0109728	-0.0166048	-0.0168577	-0.0277305	-0.0299334	-0.0228494	-0.0096883	-0.0435882	-0.00845824	-0.000521102	-0.0046433	-0.00891229	-0.00695584	-0.0102581	-0.0118838	-0.0185902	-0.0158668	-0.0120453	-0.00255834	-0.0186638	-0.00739746	-0.00825185	-0.00997347	-0.00692785	-0.00537099	-0.00222666	-0.00316421	-0.00513052	-0.00555196	-0.00386849
13	Junco	JNCO250 (51)	N/A	250°C	-0.0219564	-0.222656	-0.0169305	-0.0576494	-0.00987502	-0.0204425	-0.0174233	-0.0331349	-0.0363723	-0.0374133	-0.00391936	-0.013963	-0.087364	-0.0597829	-0.034658	-0.0116756	-0.0143542	-0.0147915	-0.0237148	-0.0244273	-0.0168721	-0.00984362	-0.0411973	-0.00715562	-0.000762859	-0.00711591	-0.0116886	-0.00731039	-0.00973188	-0.0108988	-0.0163846	-0.0142551	-0.00919501	-0.00286678	-0.0174615	-0.00629735	-0.00818785	-0.00873902	-0.00713359	-0.00365895	-0.00209515	-0.00386872	-0.00544002	-0.00536653	-0.00396831
14	Dumetella carolinensis	D250 (50)	N/A	250°C	-0.0231334	-0.214414	-0.0209115	-0.0474521	-0.0103335	-0.0255305	-0.0223704	-0.0373389	-0.045357	-0.040578	-0.0081213	-0.0165465	-0.0898895	-0.0297617	-0.0300592	-0.0109744	-0.0162245	-0.0172079	-0.0250556	-0.0267753	-0.0165508	-0.00922509	-0.0389556	-0.00905289	-0.00137297	-0.00739076	-0.012007	-0.00704092	-0.0100916	-0.0121298	-0.0160329	-0.0139888	-0.00976524	-0.00478256	-0.0169854	-0.00635775	-0.00836404	-0.00850077	-0.00630921	-0.00660048	-0.00245537	-0.00401787	-0.00504871	-0.00508907	-0.00384957
15	Pigeon	PIGG250 (52)	N/A	250°C	-0.0328706	-0.18561	-0.0280641	-0.0435307	-0.0203542	-0.0332444	-0.0332245	-0.0268255	-0.0481938	-0.0428	-0.0229485	-0.0176665	-0.0751191	-0.0346161	-0.0285407	-0.0119964	-0.0168226	-0.0210098	-0.021889	-0.0307882	-0.0157212	-0.00857014	-0.0312852	-0.0118706	-0.00295497	-0.00812241	-0.01132	-0.0071894	-0.00947014	-0.0112037	-0.0130747	-0.0111402	-0.00546553	-0.00344728	-0.0126569	-0.00627452	-0.00882976	-0.00733276	-0.0048085	-0.0151588	-0.00383887	-0.00287312	-0.00414685	-0.00421538	-0.00291464
16	Turkey	B250 (55)	N/A	250°C	-0.0240008	-0.217134	-0.00567781	-0.0232059	-0.0107315	-0.0488464	-0.0187197	-0.0335189	-0.0390697	-0.049021	-0.0117221	-0.0325623	-0.0988047	-0.0170575	-0.0225026	-0.0128304	-0.0181579	-0.0199367	-0.0245694	-0.0273021	-0.0188708	-0.0141825	-0.0462018	-0.0113448	-0.00302326	-0.0043445	-0.00793744	-0.00699254	-0.0114993	-0.0135345	-0.0170387	-0.00146153	-0.00966095	-0.00217263	-0.0205058	-0.0014501	-0.00865553	-0.00953357	-0.00727057	-0.00826682	-0.00258527	-0.0039562	-0.00517818	-0.00509883	-0.00386298
17	Pipidae	BigFROG (9)	N/A	Fossil	-0.0565407	-0.167568	-0.00641715	-0.00511546	-0.0119621	-0.0273331	-0.020143	-0.0256966	-0.0572678	-0.071328	-0.0119405	-0.0368333	-0.0833343	-0.0142106	-0.00792005	-0.0242498	-0.025906	-0.0209687	-0.0179723	-0.0242642	-0.0202871	-0.0221285	-0.0425546	-0.0112599	-0.0017354	-0.00478629	-0.0154232	-0.0149219	-0.0166844	-0.015142	-0.0131657	-0.0128107	-0.00873872	-0.00902801	-0.0198915	-0.00932865	-0.00790505	-0.00648748	-0.0082387	-0.00238679	-0.00274596	-0.0048933	-0.00476516	-0.00374719	-0.00397255
18	Pipidae	SmallFROG (10)	N/A	Fossil	-0.106699	-0.154927	-0.00797289	-0.00832602	-0.00616437	-0.0344063	-0.0202554	-0.0215445	-0.0441809	-0.058721	-0.00388445	-0.054504	-0.0698326	-0.0105597	-0.00684835	-0.0306967	-0.0271328	-0.0156252	-0.0125413	-0.0201045	-0.0156286	-0.0294899	-0.03544	-0.0094077	-0.0019148	-0.0106779	-0.0108082	-0.0177749	-0.01664	-0.0108597	-0.00854201	-0.0126065	-0.0149584	-0.0105597	-0.0178897	-0.014607	-0.00832431	-0.00604438	-0.00730262	-0.0040713	-0.00333246	-0.00586096	-0.00492841	-0.00305133	-0.00435243
19	Fur Feather	FurBIRD (6)	N/A	Fossil	-0.0817964	-0.145622	-0.0209142	-0.0219625	-0.0102052	-0.0336181	-0.0183261	-0.0203378	-0.0521194	-0.0586477	-0.00772855	-0.0448325	-0.0723427	-0.0194079	-0.0190671	-0.0284886	-0.0233503	-0.0182609	-0.0141437	-0.0247276	-0.0218749	-0.0276943	-0.0340896	-0.00399791	-0.00442323	-0.01413	-0.0112571	-0.0228695	-0.0140173	-0.012003	-0.00926915	-0.0119057	-0.0130293	-0.0097777	-0.014809	-0.0077488	-0.0051079	-0.00207953	-0.00730763	-0.00396136	-0.00278621	-0.00410358	-0.00238862	-0.00186907	-0.00160092
20	Messel Feather	MESSEL (4)	N/A	Fossil	-0.0477954	-0.151057	-0.00804623	-0.00797799	-0.0271414	-0.0265101	-0.0272587	-0.0276959	-0.0484949	-0.088338	-0.016777	-0.0284764	-0.0652144	-0.0227653	-0.0132519	-0.0189821	-0.0221959	-0.0193383	-0.0168325	-0.0233262	-0.0178689	-0.0157129	-0.0326562	-0.0114904	-0.00667498	-0.0145399	-0.0167045	-0.00929593	-0.0138426	-0.0125076	-0.0111406	-0.00933005	-0.00783298	-0.0135227	-0.0156532	-0.0161522	-0.0128211	-0.00917011	-0.00599682	-0.00913598	-0.00754508	-0.00643827	-0.00595204	-0.00525042	-0.00528881
21	Hassianicterys	HANS (12)	N/A	Fossil	-0.0973194	-0.158805	-0.0515891	-0.0542281	-0.0159988	-0.0291793	-0.0198138	-0.0132953	-0.0312231	-0.0350883	-0.0180569	-0.0558631	-0.0642462	-0.0460243	-0.0239372	-0.0297028	-0.0217357	-0.0179493	-0.00953761	-0.0143494	-0.00779502	-0.0235141	-0.0283045	-0.0110435	-0.00284694	-0.0195557	-0.00903563	-0.0109575	-0.0130299	-0.00976708	-0.0023593	-0.00580145	-0.00339912	-0.00443893	-0.00925076	-0.0068556	-0.00568671	-0.00192186	-0.00462538	-0.00178561	-0.000731455	-0.00314096	-0.00307642	-0.00149877	-0.00163502
22	Palaeochiroptetryx	POLY (13)	N/A	Fossil	-0.112012	-0.21545	-0.0026588	-0.00595855	-0.000225092	-0.0487356	-0.0265848	-0.0377356	-0.0493087	-0.146341	-0.00064654	-0.0339737	-0.0453768	-0.0262104	-0.00933253	-0.0207643	-0.0156511	-0.0132868	-0.0117032	-0.0157796	-0.0220766	-0.0158067	-0.0397199	-0.000725562	-0.000281764	-0.000480515	-0.0010624	-0.0131423	-0.00928304	-0.018258	-0.00627224	-0.0147355	-0.00663063	-0.000149263	-0.00816397	-7.42324e-05	-0.000367969	-0.000320077	-0.00333487	-0.000367171	-0.000267396	-0.000167622	-0.00020833	-0.000165227	-0.000204339
23	Pelobates	TADPOLE (11)	N/A	Fossil	-0.0537846	-0.115229	-0.00926489	-0.00816467	-0.0265311	-0.038625	-0.0320156	-0.0264181	-0.0632871	-0.0827699	-0.0283605	-0.0283009	-0.046505	-0.0249468	-0.0115121	-0.020397	-0.025691	-0.0222222	-0.0162455	-0.0278102	-0.0209533	-0.0125245	-0.0228287	-0.013231	-0.0036641	-0.0117589	-0.011526	-0.011226	-0.0159231	-0.0159883	-0.0107492	-0.0174206	-0.0106788	-0.0135987	-0.0101617	-0.0213608	-0.0128571	-0.00417805	-0.0100457	-0.00895023	-0.00417571	-0.010268	-0.00978678	-0.00337327	-0.00469057
24	Keuppia	OCTOPUS (2)	N/A	Fossil	-0.0588603	-0.181324	-0.00973692	-0.00507653	-0.00201537	-0.0176284	-0.0231119	-0.0186684	-0.0251775	-0.0934122	-0.00498024	-0.0179064	-0.0479955	-0.0198372	-0.0107768	-0.0349262	-0.0261622	-0.0131657	-0.00979302	-0.0271477	-0.0197024	-0.0366041	-0.0582666	-0.0106956	-0.00203714	-0.00898419	-0.0169946	-0.0197225	-0.0207976	-0.0057966	-0.0292401	-0.0144275	-0.0102854	-0.0217463	-0.0133155	-0.00951588	-0.00647733	-0.00525906	-0.0128115	-0.00151969	-0.00145103	-0.00698557	-0.00581168	-0.00664897	-0.00720075
25	Glyphiteuthis	SQUID (3)	N/A	Fossil	-0.0524908	-0.15585	-0.012664	-0.0125301	-0.00179363	-0.022639	-0.0193647	-0.014282	-0.0324813	-0.0794173	-0.00169104	-0.0300346	-0.054503	-0.0257423	-0.0148027	-0.0220992	-0.0228123	-0.0187773	-0.0218122	-0.0225078	-0.0251236	-0.0261331	-0.0518565	-0.00865235	-0.00534439	-0.0115064	-0.0131836	-0.0135058	-0.0185615	-0.0160181	-0.0146603	-0.0154357	-0.012645	-0.00829029	-0.0287289	-0.0133231	-0.0145427	-0.0125422	-0.0131173	-0.00372022	-0.00407694	-0.00609747	-0.00873418	-0.00821917	-0.00768623
26	Indeterminate Cephalopod	OLDSQUID (1)	N/A	Fossil	-0.0504673	-0.168726	-0.0118843	-0.012881	-0.00317087	-0.0223744	-0.0185069	-0.0230036	-0.0178317	-0.0526731	-0.00284091	-0.0310905	-0.0836214	-0.0275533	-0.0141538	-0.0208406	-0.0214525	-0.0176534	-0.0209625	-0.0185898	-0.0229994	-0.0272191	-0.0493458	-0.0123232	-0.00633464	-0.010893	-0.015524	-0.015931	-0.0175463	-0.0146169	-0.00990135	-0.0156012	-0.0137178	-0.0077894	-0.0285764	-0.0126817	-0.0137676	-0.0123733	-0.0136661	-0.00413008	-0.00372141	-0.00795362	-0.00811361	-0.00779786	-0.00719762
27	Messelornis	MESSELORNIS (5)	N/A	Fossil	-0.0260548	-0.10576	-0.00518719	-0.00695587	-0.16431	-0.0142779	-0.0151887	-0.0272128	-0.0371146	-0.0662869	-0.0720301	-0.0101788	-0.0259589	-0.0194977	-0.0110147	-0.0254192	-0.0211111	-0.0448968	-0.0152347	-0.0171596	-0.0135388	-0.012585	-0.0260491	-0.042275	-0.00224705	-0.00347219	-0.00732974	-0.00966882	-0.0140929	-0.0257739	-0.0179543	-0.0133768	-0.00568472	-0.0122178	-0.0123511	-0.0067258	-0.00628387	-0.00509995	-0.00386714	-0.00683988	-0.00500121	-0.00336961	-0.00385948	-0.00394288	-0.00554284
28	Palaeobatrachus Eye	MesselFROG (7)	N/A	Fossil	-0.0723696	-0.185699	-0.00808964	-0.00582864	-0.0111326	-0.0306472	-0.0255131	-0.024901	-0.0451451	-0.0724845	-0.00940877	-0.040763	-0.0798646	-0.0117722	-0.00881166	-0.0254906	-0.0252683	-0.018083	-0.0152224	-0.0222453	-0.0225226	-0.0210486	-0.0382322	-0.0101108	-0.00523403	-0.00978352	-0.0070953	-0.012082	-0.0155097	-0.0130588	-0.00736012	-0.0103032	-0.00706782	-0.015842	-0.0170087	-0.00760996	-0.00967109	-0.00501668	-0.00560379	-0.00246337	-0.00176133	-0.00560878	-0.00491424	-0.00368006	-0.00267073
29	Palaeobtrachus Skin	FROGnerve (8)	N/A	Fossil	-0.0658342	-0.143076	-0.00666026	-0.00878873	-0.00988512	-0.0264221	-0.0997023	-0.0231636	-0.0382384	-0.0620513	-0.00786897	-0.0366317	-0.0652077	-0.0112596	-0.00814707	-0.0221556	-0.0221038	-0.0172085	-0.012887	-0.0188567	-0.0184476	-0.020299	-0.0326922	-0.0118763	-0.00600991	-0.00909477	-0.0121577	-0.0212215	-0.0148244	-0.0121628	-0.010771	-0.012057	-0.0137183	-0.0124257	-0.0187748	-0.0140764	-0.00894148	-0.00716382	-0.00813757	-0.00427946	-0.00427024	-0.0064801	-0.00439803	-0.00457764	-0.00499329
30	Cyclostome eye	LAMPREYeye (14)	N/A	Fossil	-0.0584484	-0.161148	-0.00651332	-0.00465536	-0.0150237	-0.0405948	-0.0325418	-0.0304075	-0.050725	-0.0730871	-0.0232254	-0.0437143	-0.0686033	-0.0156525	-0.0135011	-0.0281742	-0.0226975	-0.0185719	-0.0139851	-0.0201764	-0.0175467	-0.0281704	-0.0372848	-0.0123406	-0.00928596	-0.00510508	-0.00697638	-0.0164281	-0.0084837	-0.00816547	-0.00529755	-0.0109972	-0.00508412	-0.0123883	-0.0185262	-0.0155001	-0.0080073	-0.00427615	-0.00566723	-0.00414848	-0.00361682	-0.00585017	-0.0034758	-0.00271928	-0.00321092
31	Tullymonstrum	Tullymonster_1	N/A	Fossil	-0.099687	-0.158867	-0.0146767	-0.00370999	-0.0428846	-0.00868205	-0.0259591	-0.00368577	-0.0633586	-0.0563602	-0.00393334	-0.00830979	-0.076104	-0.0345748	-0.0089045	-0.0264659	-0.0279998	-0.0269243	-0.0162428	-0.0329647	-0.0141493	-0.0227784	-0.0362459	-0.0155647	-0.00707014	-0.00455586	-0.00313501	-0.0147664	-0.0165137	-0.015771	-0.0109048	-0.0120853	-0.00450024	-0.00149171	-0.0184782	-0.0136111	-0.0110456	-0.00574797	-0.0082793	-0.00148005	-0.000660191	-0.00589149	-0.00592557	-0.00424639	-0.00480702
32	Tullymonstrum	Tullymonster_2	N/A	Fossil	-0.116621	-0.13363	-0.0110333	-0.00296894	-0.0254457	-0.0379781	-0.0230215	-0.0129358	-0.0491663	-0.0397752	-0.017768	-0.0585227	-0.0658587	-0.0219847	-0.0101189	-0.033376	-0.0274348	-0.019887	-0.0130439	-0.0233767	-0.0120219	-0.028572	-0.0372031	-0.0132247	-0.0014314	-0.00546134	-0.00378392	-0.01957	-0.0177787	-0.0137957	-0.00961466	-0.00938888	-0.00393253	-0.00203108	-0.0190775	-0.0136471	-0.0101879	-0.00512366	-0.0084655	-0.000483293	-0.000365155	-0.00647338	-0.006348	-0.00332686	-0.00474427
33	Yi qi	AR5_610_	814	Fossil	-0.0372145	-0.0727483	-0.0115079	-0.0201416	-0.0413752	-0.129093	-0.0356806	-0.0233566	-0.0405332	-0.0780716	-0.0352068	-0.0258686	-0.0365539	-0.0114687	-0.00542477	-0.0203896	-0.0189654	-0.0172756	-0.013552	-0.028065	-0.0206822	-0.0237371	-0.0193193	-0.0155147	-0.0076408	-0.0113537	-0.0056809	-0.00492493	-0.0149148	-0.011495	-0.00874023	-0.0370373	-0.0127664	-0.009414	-0.0141027	-0.00930684	-0.00930815	-0.0102364	-0.0150364	-0.00659554	-0.0113467	-0.00473623	-0.00542079	-0.00397084	-0.00422539
34	Yi qi	AR5_611_	814	Fossil	-0.0354165	-0.0604329	-0.0129446	-0.0223669	-0.0510599	-0.202629	-0.0313138	-0.0240281	-0.0364182	-0.0678619	-0.0406236	-0.022845	-0.0305769	-0.00816449	-0.00418175	-0.0164386	-0.0178472	-0.0184645	-0.0123193	-0.0347899	-0.0180631	-0.0149171	-0.0143634	-0.016357	-0.00645583	-0.0112175	-0.00483375	-0.00418722	-0.0112678	-0.00764079	-0.00704171	-0.0296818	-0.0107156	-0.00702226	-0.0110008	-0.00714698	-0.00714869	-0.0105088	-0.0110096	-0.00495821	-0.0180587	-0.0048267	-0.00430742	-0.00348519	-0.00306101
35	Sapeornis	AR5_710_	808	Fossil	-0.00776917	-0.0143962	-0.014471	-0.0290605	-0.0506733	-0.424693	-0.0106676	-0.0165432	-0.0138261	-0.022047	-0.0950949	-0.00784642	-0.0085522	-0.0110083	-0.00632902	-0.007148	-0.0220618	-0.0461422	-0.00732146	-0.0103729	-0.00458679	-0.0151927	-0.00636622	-0.0516247	-0.00752194	-0.00391415	-0.00227856	-0.00217024	-0.0041164	-0.00377334	-0.0116953	-0.0115352	-0.0126677	-0.0057631	-0.00352948	-0.00316811	-0.00316769	-0.00402804	-0.00340342	-0.00225631	-0.00337879	-0.00179596	-0.00263949	-0.00164854	-0.00175383
36	Chicken	ChickPHEO (24)	N/A	Unmatured	-0.0125076	-0.136681	-0.0234299	-0.0644111	-0.0189821	-0.0158279	-0.0177148	-0.0229519	-0.0170824	-0.0846298	-0.0331425	-0.0121683	-0.0352184	-0.0348228	-0.0540807	-0.0173091	-0.0162095	-0.019783	-0.0190514	-0.0182577	-0.024319	-0.0164288	-0.0334645	-0.019743	-0.00290975	-0.0110825	-0.0207825	-0.00946482	-0.0147906	-0.0189613	-0.00997662	-0.0167786	-0.0139025	-0.0310003	-0.0108627	-0.0110795	-0.0071122	-0.00836345	-0.00706353	-0.00789973	-0.0101039	-0.00325229	-0.00476835	-0.00479554	-0.0068321
37	Crow	CrowEU (31)	N/A	Unmatured	-0.014058	-0.142665	-0.0169112	-0.0369149	-0.0229064	-0.0162649	-0.0172472	-0.030683	-0.0435988	-0.104288	-0.0247896	-0.0165683	-0.0669756	-0.0249256	-0.0299515	-0.016012	-0.0166878	-0.018381	-0.0208919	-0.024263	-0.0281155	-0.0102412	-0.0347935	-0.0156995	-0.00185753	-0.00728365	-0.0119085	-0.0122319	-0.0115842	-0.0144308	-0.0157626	-0.0158969	-0.0116474	-0.0134014	-0.0168201	-0.0160758	-0.00921952	-0.00908612	-0.00647713	-0.00663509	-0.00715787	-0.00496723	-0.0049344	-0.00514976	-0.00363809
38	House Wren	HOWR (25)	N/A	Unmatured	-0.00888959	-0.094468	-0.0268277	-0.0653523	-0.0111273	-0.0130143	-0.0139919	-0.0279033	-0.0413325	-0.0763693	-0.0500055	-0.0201258	-0.0434511	-0.0610318	-0.0538883	-0.0203575	-0.0157942	-0.0166217	-0.0180665	-0.021331	-0.018587	-0.0185484	-0.0283975	-0.0238163	-0.00130752	-0.00797891	-0.0173221	-0.0083456	-0.0165849	-0.0240091	-0.0159535	-0.0275932	-0.0125933	-0.00700114	-0.0124697	-0.00476849	-0.00685157	-0.00657388	-0.00587124	-0.00951216	-0.00525414	-0.00631349	-0.0057473	-0.00542434	-0.00322568
39	Chicken	CHIX (30)	N/A	Unmatured	-0.0159214	-0.142274	-0.0141029	-0.0263441	-0.00200816	-0.018261	-0.0194832	-0.0371201	-0.0520766	-0.109513	-0.0250367	-0.0181084	-0.0687546	-0.0252102	-0.0240624	-0.014305	-0.0171157	-0.0182117	-0.0257269	-0.0298573	-0.0328987	-0.00922949	-0.0356737	-0.0140433	-0.00251127	-0.0048557	-0.010652	-0.00872878	-0.0133815	-0.017543	-0.0189013	-0.0209282	-0.0150088	-0.011355	-0.0164173	-0.014526	-0.00832705	-0.00935157	-0.00686125	-0.00303597	-0.00322151	-0.00407065	-0.00505224	-0.00584295	-0.00408928
40	Junco	JNCO (27)	N/A	Unmatured	-0.00967559	-0.0850794	-0.0196835	-0.0389621	-0.0362409	-0.0113751	-0.0125518	-0.0251477	-0.038366	-0.0707105	-0.060835	-0.0247214	-0.0417005	-0.0586315	-0.0279374	-0.0324232	-0.019229	-0.0183452	-0.0150111	-0.0187009	-0.0144942	-0.0364048	-0.0321115	-0.0351697	-0.00554009	-0.00573395	-0.00900125	-0.0101295	-0.0184003	-0.0291184	-0.0167968	-0.0290333	-0.0121112	-0.00312243	-0.0128443	-0.00883007	-0.0110048	-0.00739349	-0.00490365	-0.0104423	-0.00501859	-0.00412541	-0.00405362	-0.00438694	-0.00450165
41	Mallard	GRCA (29)	N/A	Unmatured	-0.0145818	-0.150349	-0.0142637	-0.0254796	-0.029719	-0.0167641	-0.0172808	-0.0320009	-0.0432565	-0.0982969	-0.0257453	-0.0162794	-0.0733888	-0.0199622	-0.0199519	-0.0170686	-0.0182369	-0.0213309	-0.0224904	-0.0266508	-0.0271013	-0.0119514	-0.0375384	-0.0156123	-0.00208682	-0.00630021	-0.00964809	-0.0105969	-0.0122283	-0.0152652	-0.0169429	-0.0189245	-0.0128893	-0.0116717	-0.0176684	-0.0154342	-0.0107839	-0.00611805	-0.00687979	-0.0083501	-0.00318855	-0.00520312	-0.00568924	-0.00507538	-0.00375399
42	Dumetella carolinensis	D (26)	N/A	Unmatured	-0.0101529	-0.0808312	-0.0364382	-0.0541184	-0.0521006	-0.0209378	-0.0188612	-0.0275743	-0.0221257	-0.0641863	-0.0521282	-0.0209787	-0.0241182	-0.0419312	-0.0310637	-0.0257306	-0.0226247	-0.0177493	-0.0152745	-0.013919	-0.0162848	-0.0136925	-0.0273044	-0.0302992	-0.00934826	-0.00787644	-0.0111749	-0.011889	-0.0148804	-0.0219002	-0.0125911	-0.010461	-0.0186534	-0.0208438	-0.0149954	-0.0158947	-0.0127859	-0.00939962	-0.00692951	-0.0263443	-0.0151808	-0.00309565	-0.00375325	-0.00754176	-0.0040349
43	Pigeon	PIGG (28)	N/A	Unmatured	-0.0113384	-0.0989222	-0.0268116	-0.0411768	-0.0140669	-0.0197399	-0.0199832	-0.0307626	-0.0499988	-0.083189	-0.0406367	-0.0275763	-0.0518337	-0.0364491	-0.0296977	-0.0275023	-0.0211815	-0.0191038	-0.0184071	-0.0226705	-0.0228476	-0.00870931	-0.0297103	-0.0259305	-0.00464108	-0.00732882	-0.0115246	-0.00984057	-0.0156468	-0.0225135	-0.015951	-0.025335	-0.013739	-0.0119863	-0.0133483	-0.0142393	-0.0110619	-0.00723615	-0.0054417	-0.00995941	-0.0058688	-0.00348281	-0.00456076	-0.00494119	-0.00310731
44	Turkey	B (32)	N/A	Unmatured	-0.0149658	-0.156117	-0.0158507	-0.0345551	-0.0037339	-0.0241129	-0.0190009	-0.0328819	-0.0454581	-0.10966	-0.0163454	-0.0166795	-0.0759607	-0.0193812	-0.0278683	-0.0144828	-0.017096	-0.0181489	-0.023806	-0.0270099	-0.0298982	-0.00907174	-0.0389493	-0.0140335	-0.00093318	-0.00643864	-0.0124152	-0.0074622	-0.0124005	-0.015853	-0.0173314	-0.0174114	-0.0127144	-0.00917036	-0.0175229	-0.0147764	-0.00867799	-0.00910084	-0.00709697	-0.00370631	-0.00247968	-0.00495689	-0.00502508	-0.00567322	-0.00378635
45	Pigeon	PIDGprox (37)	N/A	Unmatured	-0.0167227	-0.159526	-0.0171406	-0.0425884	-0.0102262	-0.0190869	-0.0204405	-0.0331742	-0.0246299	-0.0818224	-0.020942	-0.0183884	-0.0748799	-0.0283997	-0.0342659	-0.0187543	-0.0193846	-0.0187893	-0.0120574	-0.0260184	-0.029534	-0.0112471	-0.028966	-0.0161683	-0.00647688	-0.00898268	-0.0105605	-0.0079268	-0.0145777	-0.0158186	-0.0112377	-0.019637	-0.0159679	-0.0223817	-0.0202315	-0.0110962	-0.0106399	-0.00741336	-0.00510287	-0.00318044	-0.00443164	-0.00448367	-0.00552079	-0.00587815	-0.00530074
46	Pigeon	PIDGdistal (38)	N/A	Unmatured	-0.0142419	-0.129999	-0.018932	-0.0239434	-0.0349839	-0.0180271	-0.022456	-0.0300337	-0.0287362	-0.0902789	-0.0253035	-0.0196281	-0.0664628	-0.033934	-0.0316826	-0.0203117	-0.0217939	-0.0255361	-0.0139509	-0.0252946	-0.0300819	-0.0154629	-0.0376956	-0.0222729	-0.0176796	-0.00910505	-0.0113405	-0.00786006	-0.0159052	-0.0185825	-0.0107776	-0.0206235	-0.0130441	-0.0111068	-0.00107652	-0.0108924	-0.010389	-0.00797937	-0.00519046	-0.00395997	-0.00442626	-0.00392814	-0.00600021	-0.00424707	-0.00484177
47	Frog Liver	FROGliver (35)	N/A	Unmatured	-0.0174217	-0.143173	-0.0213376	-0.0407554	-0.0241379	-0.0183008	-0.0173628	-0.0289121	-0.0277168	-0.0874007	-0.0138371	-0.0147302	-0.044803	-0.0309045	-0.0288007	-0.0180186	-0.0183675	-0.0219021	-0.0230251	-0.0185783	-0.03173	-0.015508	-0.0391166	-0.0167482	-0.0134095	-0.0131295	-0.0207896	-0.0110222	-0.014468	-0.0173746	-0.0128023	-0.0186105	-0.013638	-0.0104472	-0.0169233	-0.00944228	-0.0109611	-0.0133657	-0.0108181	-0.00332754	-0.00398038	-0.00266223	-0.0067136	-0.00722339	-0.00630252
48	Frog Eye	FROGeye (33)	N/A	Unmatured	-0.0114927	-0.0905397	-0.00824315	-0.0139147	-0.0964774	-0.0140079	-0.0149455	-0.0273136	-0.0209376	-0.0757788	-0.104309	-0.00912964	-0.0300521	-0.0321912	-0.0159706	-0.0162151	-0.0143703	-0.0474218	-0.0184265	-0.0134246	-0.0220795	-0.00967753	-0.0342539	-0.0260697	-0.0209189	-0.0052644	-0.00798547	-0.00704959	-0.025423	-0.0311474	-0.0195518	-0.014374	-0.0114995	-0.00735943	-0.0140452	-0.00920625	-0.0129924	-0.0108381	-0.00445514	-0.00735093	-0.00588524	-0.00212713	-0.00636595	-0.00605912	-0.0028589
49	Frog Eye	FROGeye (34)	N/A	Unmatured	-0.0104462	-0.101072	-0.0122381	-0.0222357	-0.074941	-0.015071	-0.014873	-0.0320273	-0.0308187	-0.0735953	-0.0398419	-0.0101826	-0.0329553	-0.0229763	-0.0192937	-0.0187914	-0.0169579	-0.0278256	-0.0204304	-0.019083	-0.0255357	-0.0274936	-0.0291506	-0.0401437	-0.0244699	-0.00683218	-0.0112369	-0.0155244	-0.0178203	-0.025844	-0.0263646	-0.0214747	-0.0178967	-0.00764404	-0.0153477	-0.0122742	-0.00957816	-0.010542	-0.00729227	-0.0059707	-0.00695304	-0.00413161	-0.00583146	-0.00567334	-0.00331765
50	Magpie Feather	MAGfeather (39)	N/A	Unmatured	-0.0206424	-0.143318	-0.0178746	-0.0348291	-0.0198777	-0.0193981	-0.0174843	-0.0307345	-0.0241564	-0.0838083	-0.018173	-0.0175675	-0.0484039	-0.0297686	-0.0296735	-0.0213924	-0.020757	-0.0215166	-0.0226563	-0.0205362	-0.0280087	-0.0169252	-0.0452587	-0.0185946	-0.0151978	-0.00824249	-0.0133639	-0.0090411	-0.0148058	-0.0179143	-0.0185034	-0.0206622	-0.0125993	-0.00668211	-0.0222149	-0.0104198	-0.0100134	-0.0112285	-0.00893707	-0.00362051	-0.00421508	-0.00434328	-0.0057014	-0.00614725	-0.00479114
51	Eumelanin Standard	PUREMEL (36)	N/A	Unmatured	-0.0229227	-0.1514	-0.00385603	-0.0093072	-0.0132474	-0.0183137	-0.0172608	-0.0280272	-0.044839	-0.0859443	-0.0219416	-0.0164316	-0.0630599	-0.00837604	-0.0105596	-0.0343334	-0.0237143	-0.017009	-0.0168536	-0.0182013	-0.0225157	-0.0138155	-0.0342059	-0.01672	-0.0176743	-0.00590687	-0.0074764	-0.0167735	-0.0172684	-0.0247404	-0.0157947	-0.0170896	-0.0120434	-0.0293226	-0.0159645	-0.0235968	-0.0132919	-0.00976258	-0.0112747	-0.00887424	-0.0112233	-0.0088921	-0.00858569	-0.00707893	-0.00450931
52	Wrinkled Hornbill - Black	AR8_220_	1031	SEM~190°C	-0.0438895	-0.144053	-0.0033852	-0.0048834	-0.00377111	-0.0279233	-0.0176082	-0.146111	-0.0345995	-0.0834489	-0.00431118	-0.0185883	-0.0746982	-0.00853419	-0.010483	-0.012463	-0.0166631	-0.0119199	-0.0232077	-0.0196956	-0.0352154	-0.0358471	-0.0326538	-0.00748849	-0.00908013	-0.00389289	-0.00672311	-0.00465999	-0.00863133	-0.00862064	-0.00749057	-0.0126093	-0.0121248	-0.0157645	-0.0154407	-0.0132452	-0.00602867	-0.0160163	-0.0106453	-0.0031974	-0.00482347	-0.00655148	-0.00523378	-0.00425808	-0.00352034
53	Common Pheasant -Reddish Brown	AR8_511_	1041	SEM~190°C	-0.0656557	-0.124371	-0.00628025	-0.00878206	-0.00745805	-0.0326766	-0.0194626	-0.213062	-0.03596	-0.0739816	-0.00755843	-0.0217509	-0.0555673	-0.0141408	-0.016703	-0.0119145	-0.0113622	-0.0115133	-0.0160564	-0.0147999	-0.0243641	-0.0510862	-0.0185122	-0.00617717	-0.0102742	-0.00577228	-0.00739629	-0.00558792	-0.00564784	-0.00443118	-0.00474162	-0.00584469	-0.0102557	-0.0092632	-0.0086978	-0.00539073	-0.00479825	-0.0168748	-0.00581425	-0.00272915	-0.00240711	-0.00443805	-0.00531508	-0.00306509	-0.00205865
54	Pigeon - Grey	AR8_720_	1035	SEM~190°C	-0.131275	-0.0959723	-0.00775091	-0.00990647	-0.00859511	-0.0306342	-0.01519	-0.27256	-0.0235723	-0.0446956	-0.00482863	-0.0342202	-0.042976	-0.0179644	-0.0157266	-0.0115805	-0.0073673	-0.00583218	-0.0081301	-0.0081067	-0.0118363	-0.0922413	-0.0146626	-0.00493697	-0.00553214	-0.00553696	-0.005901	-0.00392368	-0.00514352	-0.00295984	-0.00290075	-0.00205518	-0.00347125	-0.0061569	-0.00751556	-0.00501552	-0.00501552	-0.00343193	-0.00217306	-0.00335318	-0.00196739	-0.00214366	-0.00232053	-0.00135738	-0.00156343
55	Wrinkled Hornbill - Black	AR8_611_	1037	SEM~190°C	-0.040783	-0.155939	-0.00250284	-0.00433569	-0.00413473	-0.0288304	-0.0246485	-0.113569	-0.0325688	-0.0879225	-0.00276559	-0.0200789	-0.0829345	-0.00751815	-0.00783475	-0.0156517	-0.019293	-0.0121032	-0.024572	-0.0196543	-0.0352172	-0.0296325	-0.0374728	-0.00810546	-0.00844911	-0.00345071	-0.00469481	-0.00444377	-0.00973358	-0.00996136	-0.00830361	-0.0134189	-0.0111536	-0.0166785	-0.0175536	-0.0149449	-0.00589412	-0.0180431	-0.00900258	-0.00334116	-0.00464354	-0.00642741	-0.00396847	-0.00421964	-0.00360452
56	Pigeon - Grey	AR5_110_	1042	SEM~190°C	-0.057967	-0.121114	-0.00779682	-0.00840659	-0.0123243	-0.0253469	-0.0287898	-0.197374	-0.0334082	-0.0785253	-0.00941605	-0.0236276	-0.0582463	-0.0109293	-0.0125617	-0.0134217	-0.0130808	-0.0112672	-0.0158959	-0.0158918	-0.0258329	-0.044277	-0.023844	-0.00711138	-0.00869848	-0.00559378	-0.00537675	-0.00557819	-0.0102827	-0.00693651	-0.00571966	-0.00704634	-0.00828439	-0.0120131	-0.0113942	-0.0116321	-0.0116311	-0.00489303	-0.00433265	-0.00619358	-0.00367752	-0.00403975	-0.00438034	-0.00288734	-0.00295175
57	White-rumped mannikin -Black	AR4_510_	1077	SEM ~200°C	-0.0101703	-0.116392	-0.00124179	-0.00198707	-0.002126	-0.0155514	-0.0199943	-0.0430831	-0.0174637	-0.281019	-0.00757096	-0.00504345	-0.0271396	-0.00425841	-0.00300291	-0.00658509	-0.00790976	-0.00575474	-0.0278081	-0.031408	-0.0681384	-0.0202406	-0.0092572	-0.0035529	-0.00494606	-0.00397641	-0.00680791	-0.00485755	-0.00750067	-0.00503347	-0.00441755	-0.141039	-0.0167008	-0.0117723	-0.004433	-0.00797923	-0.00797763	-0.00354339	-0.0035405	-0.00427106	-0.00362084	-0.00837292	-0.00358846	-0.00202589	-0.00689639
58	Shrenck's Bittern - Reddish Brown	AR4_610_	1078	SEM ~200°C	-0.0670961	-0.172103	-0.00856878	-0.0150825	-0.0224228	-0.0363712	-0.0430207	-0.0914061	-0.0263477	-0.0728791	-0.00613919	-0.0336031	-0.0794388	-0.0101333	-0.0142377	-0.0209233	-0.0149392	-0.0101425	-0.0134971	-0.0134518	-0.0228173	-0.0232359	-0.0275314	-0.00596081	-0.015024	-0.00647206	-0.00560848	-0.00822794	-0.0114281	-0.00711842	-0.00506363	-0.00628025	-0.00594115	-0.0144331	-0.0126596	-0.0100283	-0.0100283	-0.00355375	-0.00445503	-0.00561682	-0.00355808	-0.00328677	-0.0033366	-0.00326514	-0.00326501
59	Shrenck's Bittern - Grey	AR4_710_	1079	SEM ~200°C	-0.0743662	-0.11137	-0.0148019	-0.0117555	-0.0541077	-0.0504942	-0.0639615	-0.123202	-0.0318086	-0.0646845	-0.015839	-0.0299597	-0.0422977	-0.0130844	-0.00844912	-0.0160881	-0.0108704	-0.0183848	-0.0143065	-0.015527	-0.0169738	-0.0279097	-0.0147993	-0.00814302	-0.03849	-0.00627771	-0.00598606	-0.0044599	-0.0075607	-0.00482635	-0.00420621	-0.00559633	-0.00564317	-0.00830773	-0.00814288	-0.00608958	-0.00608489	-0.00410738	-0.00433287	-0.0048775	-0.00633853	-0.00326697	-0.00329503	-0.00618391	-0.0027411
60	Pigeon-iridescent	AR4_810_	1080	SEM ~200°C	-0.0609284	-0.121475	-0.00964418	-0.00934703	-0.0423857	-0.0407532	-0.0432583	-0.126367	-0.0257604	-0.0843273	-0.00950422	-0.0250598	-0.051835	-0.0101602	-0.00790212	-0.0157141	-0.0132088	-0.0123672	-0.0149334	-0.0163623	-0.0214548	-0.0335159	-0.0231824	-0.0073065	-0.0244474	-0.00531094	-0.00658842	-0.00431338	-0.0100208	-0.00708791	-0.00532853	-0.0119121	-0.00749886	-0.0116319	-0.012875	-0.0114562	-0.0114475	-0.00559943	-0.00588845	-0.00703481	-0.00535486	-0.00484706	-0.00518822	-0.0053902	-0.00402445
61	Common Pheasant -Reddish Brown	AR8_321_	1026	SEM ~225°C	-0.0688101	-0.112749	-0.00420358	-0.00511005	-0.0106768	-0.0292346	-0.0369889	-0.203808	-0.0269223	-0.0648807	-0.00362402	-0.020115	-0.0519064	-0.011443	-0.0118414	-0.0110291	-0.0116018	-0.00913478	-0.0162605	-0.0134981	-0.0207322	-0.0703204	-0.0232392	-0.00568449	-0.00961	-0.00374475	-0.00492468	-0.0037683	-0.00842137	-0.00573151	-0.00585512	-0.00628264	-0.0064058	-0.0106133	-0.0112065	-0.0118262	-0.00463049	-0.0348132	-0.00556365	-0.00422179	-0.0041921	-0.004719	-0.00423013	-0.00302732	-0.00239781
62	Turkey - iridescent	AR8_411_	1028	SEM ~225°C	-0.066069	-0.108644	-0.00459953	-0.00535391	-0.00949015	-0.0339239	-0.0295174	-0.189745	-0.0316794	-0.0677961	-0.00517321	-0.0142472	-0.0555922	-0.0125718	-0.0131198	-0.0113635	-0.0145598	-0.0125673	-0.0196825	-0.0163184	-0.0258625	-0.0554851	-0.023391	-0.00661481	-0.0160919	-0.00305969	-0.00635715	-0.0030191	-0.00689492	-0.00483901	-0.00480739	-0.00978456	-0.00982498	-0.0108974	-0.0114178	-0.00974807	-0.00561152	-0.0316713	-0.00794368	-0.00297399	-0.00326295	-0.00609503	-0.00569294	-0.00417516	-0.00246382
63	Wrinkled Hornbill - Black	AR8_711_	1030	SEM ~225°C	-0.134275	-0.102209	-0.0072877	-0.00897448	-0.00620978	-0.0261736	-0.0116974	-0.277566	-0.023408	-0.0472452	-0.00464393	-0.0360881	-0.0450819	-0.0162375	-0.0154974	-0.0126397	-0.00787646	-0.0063917	-0.0075393	-0.00797458	-0.0125783	-0.0872539	-0.0147412	-0.00481084	-0.00375767	-0.00516205	-0.00550474	-0.0036693	-0.00498645	-0.00285281	-0.00301077	-0.00201008	-0.00327413	-0.006629	-0.00684935	-0.0048284	-0.00332678	-0.00578855	-0.00294056	-0.0013082	-0.00136927	-0.0023611	-0.00395899	-0.000930664	-0.00107959
64	Pigeon - Grey	AR8_820_	1045	SEM ~225°C	-0.0438892	-0.144053	-0.00338496	-0.00488364	-0.00377115	-0.0279233	-0.0176085	-0.146111	-0.0345996	-0.0834493	-0.00431098	-0.0185883	-0.0746981	-0.00853397	-0.0104831	-0.012463	-0.0166629	-0.0119196	-0.0232079	-0.0196959	-0.0352156	-0.0358469	-0.032654	-0.00748853	-0.00908009	-0.00389266	-0.00672312	-0.00466016	-0.00863104	-0.00862057	-0.00749062	-0.0126096	-0.0121249	-0.0157648	-0.0154408	-0.0132451	-0.00602895	-0.0160162	-0.0106451	-0.0031971	-0.00482358	-0.00655133	-0.00523352	-0.00425791	-0.00352044
65	Common Pheasant -Reddish Brown	AR9_111_	1065	SEM ~250°C	-0.108399	-0.0224261	-0.0121639	-0.00821491	-0.0330139	-0.0625626	-0.0553462	-0.294683	-0.022941	-0.021261	-0.00592369	-0.0256106	-0.0110614	-0.0200832	-0.0123673	-0.00787701	-0.0043764	-0.00480883	-0.0116757	-0.00946622	-0.005194	-0.0920116	-0.00757292	-0.0066604	-0.0320818	-0.0058765	-0.00782968	-0.00221494	-0.00253907	-0.00162061	-0.00161379	-0.00118838	-0.0021136	-0.00171513	-0.00655251	-0.00261334	-0.00423462	-0.0344747	-0.00309296	-0.00633903	-0.00270799	-0.00183672	-0.0072687	-0.00527819	-0.00110743
66	Wrinkled Hornbill - Black	AR9_211_	1058	SEM ~250°C	-0.0752163	-0.0966887	-0.00567918	-0.0051299	-0.0146678	-0.0307529	-0.0817643	-0.211775	-0.0255774	-0.0529048	-0.00381984	-0.0264424	-0.0410853	-0.0112047	-0.0105067	-0.0125685	-0.00973695	-0.00690425	-0.0125749	-0.011213	-0.0158131	-0.0638329	-0.0167054	-0.00484886	-0.0112423	-0.00459206	-0.00471386	-0.00341631	-0.00876887	-0.00469652	-0.00611841	-0.00336354	-0.00432689	-0.00988867	-0.00807978	-0.00916946	-0.00394513	-0.0478586	-0.00367393	-0.00465149	-0.00344701	-0.00273443	-0.00332427	-0.00266722	-0.00190841
67	Pigeon - Grey	AR9_321_	1061	SEM ~250°C	-0.0980278	-0.0382026	-0.00847048	-0.00630409	-0.0199927	-0.035201	-0.0862318	-0.28986	-0.0202146	-0.0303115	-0.00473606	-0.0233218	-0.0159288	-0.0154102	-0.0130566	-0.00700634	-0.00435447	-0.00431621	-0.00964925	-0.00810266	-0.00754603	-0.0977137	-0.00974952	-0.00446645	-0.0204669	-0.0041111	-0.00454058	-0.00235854	-0.00387971	-0.00224654	-0.0023013	-0.00155541	-0.00251584	-0.00365551	-0.00586774	-0.00354339	-0.00328114	-0.0633195	-0.00210827	-0.00416373	-0.0021107	-0.00166025	-0.0035005	-0.0034601	-0.00117899
68	Turkey - iridescent	AR9_410_	1056	SEM ~250°C	-0.0852132	-0.0589849	-0.00788799	-0.00641214	-0.0195814	-0.0449255	-0.0601663	-0.260166	-0.0238758	-0.0383106	-0.00726744	-0.0195903	-0.027142	-0.015328	-0.0147179	-0.00850909	-0.00720877	-0.00880652	-0.0118914	-0.0100149	-0.0119666	-0.0790383	-0.0127729	-0.00593862	-0.0294661	-0.00474007	-0.00637874	-0.00323613	-0.00364659	-0.00289271	-0.00277542	-0.0033869	-0.00477773	-0.00462278	-0.00746959	-0.00459332	-0.00441326	-0.0452831	-0.00314395	-0.00419559	-0.00220178	-0.00481543	-0.00586314	-0.00475287	-0.00162821
69	Turkey - iridescent	AR9_510_	1057	SEM ~250°C	-0.0971771	-0.0593324	-0.00763844	-0.00660871	-0.0233139	-0.0439671	-0.0590327	-0.242167	-0.0214068	-0.0369334	-0.00585374	-0.0239756	-0.0283791	-0.0143584	-0.0126731	-0.00923291	-0.00731492	-0.00694216	-0.0111563	-0.00910505	-0.0108272	-0.082383	-0.0136208	-0.00538327	-0.0262899	-0.00417281	-0.00530975	-0.00294302	-0.00556958	-0.00374156	-0.00401598	-0.00284018	-0.00357992	-0.00587831	-0.00771744	-0.00617735	-0.00447166	-0.0525626	-0.00322718	-0.00443749	-0.00264912	-0.00405024	-0.00506954	-0.00471196	-0.00180183
70	Common Pheasant -Reddish Brown	AR9_611_	1064	SEM ~250°C	-0.0876959	-0.0179822	-0.00990775	-0.007609	-0.0459398	-0.0661794	-0.0816258	-0.240019	-0.0192048	-0.0175481	-0.00478755	-0.0195584	-0.00898007	-0.0183668	-0.0104577	-0.00719092	-0.00359908	-0.00410265	-0.0121925	-0.00834995	-0.00375013	-0.0707687	-0.00617297	-0.00562381	-0.059205	-0.00445521	-0.00687337	-0.00156514	-0.00238062	-0.00172117	-0.00150471	-0.00139402	-0.00211379	-0.00171111	-0.00529152	-0.00269776	-0.00370485	-0.0949835	-0.00276323	-0.00853195	-0.00264242	-0.00222454	-0.00685817	-0.00837541	-0.00138908
71	Wrinkled Hornbill - Black	AR9_720_	1059	SEM ~250°C	-0.0841407	-0.0756897	-0.00726008	-0.00627646	-0.0199333	-0.0365454	-0.0778256	-0.255224	-0.0257521	-0.0441335	-0.00484191	-0.0257408	-0.0320078	-0.0146924	-0.012341	-0.0101532	-0.0080365	-0.00711013	-0.0140077	-0.011208	-0.0131811	-0.0776384	-0.0142799	-0.00593528	-0.00906106	-0.00529823	-0.00662589	-0.003305	-0.00628632	-0.00383646	-0.00433541	-0.00263063	-0.00376257	-0.00718004	-0.00703879	-0.00714735	-0.00442096	-0.0194433	-0.00424155	-0.00626228	-0.00369537	-0.00254417	-0.00484334	-0.00236373	-0.00172277
72	Pigeon - Grey	AR9_820_	1060	SEM ~250°C	-0.0882823	-0.0317421	-0.00840051	-0.00631815	-0.0216462	-0.0331604	-0.087803	-0.313106	-0.0195135	-0.0289541	-0.00514285	-0.0220482	-0.0136602	-0.0153197	-0.0137521	-0.00609491	-0.00382692	-0.00438552	-0.00955056	-0.00790257	-0.00676824	-0.0945478	-0.00892669	-0.00447284	-0.0214739	-0.00410238	-0.00484854	-0.00225675	-0.0034204	-0.00219068	-0.00202758	-0.00146998	-0.00232769	-0.00299289	-0.00548019	-0.00297791	-0.00316862	-0.0679851	-0.00199902	-0.00419003	-0.00198536	-0.0015546	-0.0037183	-0.00337946	-0.00112534
73	Wrinkled Hornbill - Black	AR5_510_	1053	SEM ~300°C	-0.0711747	-0.0266706	-0.0131638	-0.0120284	-0.0733632	-0.0447837	-0.127684	-0.237102	-0.023579	-0.048844	-0.0168697	-0.0179514	-0.0084936	-0.0129779	-0.00949567	-0.00668471	-0.00562153	-0.0107261	-0.0177919	-0.0146424	-0.00968018	-0.0494682	-0.00517406	-0.00879503	-0.0322993	-0.00592938	-0.00892927	-0.00294168	-0.0021754	-0.00162169	-0.00203556	-0.010868	-0.00439033	-0.00213056	-0.00611926	-0.00366307	-0.00365189	-0.00497221	-0.00316534	-0.00468135	-0.0121215	-0.00445765	-0.00294152	-0.00655639	-0.0015825
74	Common Pheasant -Reddish Brown	AR8_120_	1047	SEM ~300°C	-0.0499415	-0.131957	-0.00362035	-0.00491001	-0.00340007	-0.0280708	-0.018741	-0.187365	-0.0351821	-0.081829	-0.00580126	-0.0180867	-0.0663374	-0.00971541	-0.0130389	-0.0122535	-0.015406	-0.0129232	-0.0208682	-0.0177447	-0.0309473	-0.0455934	-0.0276488	-0.0070406	-0.00787106	-0.0038194	-0.00600385	-0.00382479	-0.00686672	-0.00688344	-0.00628048	-0.0103297	-0.0113334	-0.0124186	-0.0123704	-0.0096482	-0.00534616	-0.0188936	-0.00742099	-0.00244411	-0.003347	-0.00584459	-0.00477904	-0.00335098	-0.00250182
75	White-rumped mannikin -Black	AR4_110_	1073	SEM ~300°C	-0.0850799	-0.0316348	-0.0102664	-0.00808221	-0.0440419	-0.0347554	-0.0605374	-0.32141	-0.0178659	-0.0625611	-0.0103125	-0.0183845	-0.00753999	-0.0130521	-0.0141275	-0.00476042	-0.00406169	-0.00709664	-0.0120793	-0.015008	-0.00917389	-0.104162	-0.00821843	-0.00547149	-0.0258496	-0.00435098	-0.00614109	-0.00246228	-0.00220603	-0.00138795	-0.00193744	-0.00940163	-0.00287539	-0.00218125	-0.00437151	-0.00201174	-0.00201174	-0.00285883	-0.0022349	-0.00242907	-0.00497532	-0.00236299	-0.00205309	-0.00418589	-0.00202831
76	Shrenck's Bittern - Reddish Brown	AR4_210_	1074	SEM ~300°C	-0.015317	-0.134114	-0.0017214	-0.00340538	-0.00913342	-0.0227662	-0.0254714	-0.0644461	-0.0162038	-0.293316	-0.00669858	-0.00439221	-0.0233334	-0.0118812	-0.00550601	-0.00483138	-0.00904003	-0.00556821	-0.032111	-0.0338738	-0.0683367	-0.0227907	-0.00605499	-0.00372898	-0.00983029	-0.00357622	-0.00665985	-0.00386315	-0.00330581	-0.00326479	-0.0029229	-0.0829809	-0.011608	-0.00875684	-0.00260683	-0.00481352	-0.00480824	-0.00231956	-0.00303097	-0.00403402	-0.00333587	-0.00598319	-0.00242525	-0.00220327	-0.00362777
77	Shrenck's Bittern - Grey	AR4_310_	1075	SEM ~300°C	-0.0565505	-0.0729784	-0.0107037	-0.00970302	-0.0722049	-0.065885	-0.0427086	-0.0919368	-0.0209749	-0.130102	-0.0121399	-0.0158393	-0.0154042	-0.0125749	-0.00852788	-0.0122704	-0.0124444	-0.0153168	-0.0208444	-0.0230641	-0.0255019	-0.0285491	-0.00639602	-0.00878893	-0.0463336	-0.00678759	-0.0109647	-0.0041332	-0.00430723	-0.0041332	-0.00517738	-0.0315968	-0.00761423	-0.0068311	-0.00857139	-0.00582999	-0.00582999	-0.0074402	-0.00556895	-0.00826684	-0.0112262	-0.00622199	-0.00678759	-0.00913786	-0.00582999
78	Pigeon-iridescent	AR5_310_	1051	SEM ~300°C	-0.0856051	-0.01447	-0.0146743	-0.0138841	-0.0476364	-0.0332588	-0.0496634	-0.369917	-0.0228426	-0.027213	-0.0191539	-0.0197766	-0.00651887	-0.0155983	-0.0142132	-0.0055592	-0.00392798	-0.00852234	-0.0123211	-0.0121718	-0.00532789	-0.0823002	-0.00710545	-0.00722241	-0.0300916	-0.00555712	-0.00732776	-0.00283583	-0.00265087	-0.00178591	-0.00198952	-0.00181727	-0.00333728	-0.00172281	-0.00662579	-0.00309793	-0.00309583	-0.00374497	-0.00329759	-0.00311907	-0.00752705	-0.00309608	-0.00195581	-0.00508409	-0.00135551
79	Wrinkled Hornbill - Black	AR5_410_	1052	SEM ~300°C	-0.0775622	-0.018181	-0.0144827	-0.015079	-0.0623576	-0.0335423	-0.128782	-0.285556	-0.0243558	-0.0315704	-0.0209683	-0.0198817	-0.00770442	-0.0144658	-0.0111878	-0.00592118	-0.00493177	-0.00839953	-0.0182863	-0.0135069	-0.00762421	-0.0563459	-0.00582515	-0.00854247	-0.0172873	-0.00634913	-0.00938173	-0.00300806	-0.00254699	-0.00120636	-0.00216574	-0.0045295	-0.00434459	-0.00196039	-0.00573615	-0.00338914	-0.00338914	-0.00469686	-0.0036156	-0.0048478	-0.0134378	-0.00444561	-0.00257203	-0.00452133	-0.00150795
